# Supplementary material for: Antimicrobial removal on piglets promotes health and higher bacterial diversity in the nasal microbiota
Source: PubMed Central journal article supplement (PMC6484018; doi:10.1038/s41598-019-43022-y), 2019-04-25
Supplement: 41598_2019_43022_MOESM1_ESM.pdf [file 41598_2019_43022_MOESM1_ESM.pdf]

## **Antimicrobial removal on piglets promotes health and higher bacterial diversity in the nasal microbiota**

Florencia Correa-Fiz<sup>1,\*</sup>, José Maurício Gonçalves dos Santos<sup>2</sup>, Francesc Illas<sup>3</sup>, Virginia Aragon<sup>1</sup>

<sup>1</sup> IRTA, Centre de Recerca en Sanitat Animal (CReSA, IRTA-UAB), Campus de la Universitat Autònoma de Barcelona, 08193 Bellaterra, Spain

<sup>2</sup> Unicesumar-Centro Universitário de Maringá, Maringá, Paraná, Brazil

<sup>3</sup> Selección Batallé. Avinguda dels segadors. 17421 Riudarenes, Spain

\*Corresponding author: Florencia Correa-Fiz

email: [flor.correa@irta.cat](mailto:flor.correa@irta.cat)

José Maurício Gonçalves dos Santos

email: [jmgds@hotmail.com](mailto:jmgds@hotmail.com)

Francesc Illas

email: [fillas@batalle.com](mailto:fillas@batalle.com)

Virginia Aragon

email: [virginia.aragon@irta.cat](mailto:virginia.aragon@irta.cat)

**Additional file 1A. Frequencies of OTUs assigned at genus level from farm MT at the two sampling times (MT1 and MT2).**

| OTU             | Phylum                | Class                      | Order                    | Family                                      | Genus                      | Frquency    |                 | FDR_P           |
|-----------------|-----------------------|----------------------------|--------------------------|---------------------------------------------|----------------------------|-------------|-----------------|-----------------|
|                 |                       |                            |                          |                                             |                            | MT1         | MT2             |                 |
| <i>Bacteria</i> | <i>Firmicutes</i>     | <i>Bacilli</i>             | <i>Lactobacillales</i>   | <i>Aerococcaceae</i>                        | <i>Abiotrophia</i>         | 1,46812E-05 | 0               | 0,11760<br>1295 |
| <i>Bacteria</i> | <i>Firmicutes</i>     | <i>Clostridia</i>          | <i>Clostridiales</i>     | <i>Ruminococcaceae</i>                      | <i>Acetanaerobacterium</i> | 9,19829E-05 | 0,0024192<br>22 | 0,02052<br>4464 |
| <i>Bacteria</i> | <i>Firmicutes</i>     | <i>Clostridia</i>          | <i>Clostridiales</i>     | <i>Lachnospiraceae</i>                      | <i>Acetitomaculum</i>      | 0           | 7,84276E-<br>06 | 0,03758<br>8881 |
| <i>Bacteria</i> | <i>Firmicutes</i>     | <i>Clostridia</i>          | <i>Clostridiales</i>     | <i>Ruminococcaceae</i>                      | <i>Acetivibrio</i>         | 1,44989E-05 | 0,0001603<br>01 | 0,03646<br>983  |
| <i>Bacteria</i> | <i>Firmicutes</i>     | <i>Clostridia</i>          | <i>Clostridiales</i>     | <i>Peptostreptococcaceae</i>                | <i>Acetoanaerobium</i>     | 0           | 1,19968E-<br>06 | 0,34957<br>4806 |
| <i>Bacteria</i> | <i>Proteobacteria</i> | <i>Alphaproteobacteria</i> | <i>Rhodospirillales</i>  | <i>Acetobacteraceae</i>                     | <i>Acetobacter</i>         | 0           | 0,000037        | 0,08235<br>5525 |
| <i>Bacteria</i> | <i>Tenericutes</i>    | <i>Mollicutes</i>          | <i>Acholeplasmatales</i> | <i>Acholeplasmataceae</i>                   | <i>Acholeplasma</i>        | 0,00025045  | 9,1606E-06      | 0,65591<br>049  |
| <i>Bacteria</i> | <i>Proteobacteria</i> | <i>Betaproteobacteria</i>  | <i>Burkholderiales</i>   | <i>Alcaligenaceae</i>                       | <i>Achromobacter</i>       | 0           | 2,99919E-<br>06 | 0,34957<br>4806 |
| <i>Bacteria</i> | <i>Firmicutes</i>     | <i>Clostridia</i>          | <i>Clostridiales</i>     | <i>Clostridiales_Incertae<br/>Sedis XII</i> | <i>Acidaminobacter</i>     | 0           | 5,87721E-<br>07 | 0,34957<br>4806 |
| <i>Bacteria</i> | <i>Firmicutes</i>     | <i>Negativicutes</i>       | <i>Selenomonadales</i>   | <i>Acidaminococcaceae</i>                   | <i>Acidaminococcus</i>     | 1,37351E-05 | 0,0007320<br>89 | 0,01427<br>6949 |
| <i>Bacteria</i> | <i>Proteobacteria</i> | <i>Alphaproteobacteria</i> | <i>Rhodospirillales</i>  | <i>Acetobacteraceae</i>                     | <i>Acidicaldus</i>         | 3,94286E-06 | 0               | 0,28504<br>9407 |
| <i>Bacteria</i> | <i>Proteobacteria</i> | <i>Betaproteobacteria</i>  | <i>Burkholderiales</i>   | <i>Comamonadaceae</i>                       | <i>Acidovorax</i>          | 3,50182E-05 | 1,23301E-<br>05 | 0,94507<br>1382 |
| <i>Bacteria</i> | <i>Proteobacteria</i> | <i>Gammaproteobacteria</i> | <i>Pseudomonadales</i>   | <i>Moraxellaceae</i>                        | <i>Acinetobacter</i>       | 0,010899768 | 0,0083482<br>8  | 0,13246<br>3567 |
| <i>Bacteria</i> | <i>Proteobacteria</i> | <i>Gammaproteobacteria</i> | <i>Pasteurellales</i>    | <i>Pasteurellaceae</i>                      | <i>Actinobacillus</i>      | 0,005321002 | 0,0089672<br>38 | 0,72845<br>4189 |
| <i>Bacteria</i> | <i>Actinobacteria</i> | <i>Actinobacteria</i>      | <i>Actinomycetales</i>   | <i>Actinomycetaceae</i>                     | <i>Actinobaculum</i>       | 5,29732E-06 | 8,99757E-<br>07 | 0,36284<br>8315 |

|                 |                        |                            |                           |                            |                      |             |                 |                 |
|-----------------|------------------------|----------------------------|---------------------------|----------------------------|----------------------|-------------|-----------------|-----------------|
| <i>Bacteria</i> | <i>Actinobacteria</i>  | <i>Actinobacteria</i>      | <i>Actinomycetales</i>    | <i>Actinomycetaceae</i>    | <i>Actinomyces</i>   | 6,98171E-05 | 0,0001628<br>29 | 0,03555<br>7906 |
| <i>Bacteria</i> | <i>Actinobacteria</i>  | <i>Actinobacteria</i>      | <i>Actinomycetales</i>    | <i>Micromonosporaceae</i>  | <i>Actinoplanes</i>  | 7,80857E-06 | 0               | 0,28504<br>9407 |
| <i>Bacteria</i> | <i>Actinobacteria</i>  | <i>Actinobacteria</i>      | <i>Coriobacteriales</i>   | <i>Coriobacteriaceae</i>   | <i>Adlercreutzia</i> | 0,000000862 | 2,22611E-<br>06 | 0,61965<br>6703 |
| <i>Bacteria</i> | <i>Proteobacteria</i>  | <i>Betaproteobacteria</i>  | <i>Burkholderiales</i>    | <i>Alcaligenaceae</i>      | <i>Advenella</i>     | 0,000100444 | 3,25633E-<br>05 | 0,55568<br>979  |
| <i>Bacteria</i> | <i>Firmicutes</i>      | <i>Bacilli</i>             | <i>Bacillales</i>         | <i>Bacillaceae 1</i>       | <i>Aeribacillus</i>  | 1,41306E-06 | 0               | 0,28504<br>9407 |
| <i>Bacteria</i> | <i>Firmicutes</i>      | <i>Bacilli</i>             | <i>Lactobacillales</i>    | <i>Aerococcaceae</i>       | <i>Aerococcus</i>    | 0,001004635 | 0,0016340<br>28 | 0,10488<br>1801 |
| <i>Bacteria</i> | <i>Proteobacteria</i>  | <i>Gammaproteobacteria</i> | <i>Aeromonadales</i>      | <i>Aeromonadaceae</i>      | <i>Aeromonas</i>     | 7,18931E-05 | 1,14766E-<br>05 | 0,14887<br>1993 |
| <i>Bacteria</i> | <i>Proteobacteria</i>  | <i>Alphaproteobacteria</i> | <i>Rhizobiales</i>        | <i>Bradyrhizobiaceae</i>   | <i>Afipia</i>        | 8,50657E-06 | 0,0007256<br>63 | 0,03389<br>4854 |
| <i>Bacteria</i> | <i>Actinobacteria</i>  | <i>Actinobacteria</i>      | <i>Actinomycetales</i>    | <i>Microbacteriaceae</i>   | <i>Agrococcus</i>    | 7,06532E-07 | 0               | 0,28504<br>9407 |
| <i>Bacteria</i> | <i>Verrucomicrobia</i> | <i>Verrucomicrobiae</i>    | <i>Verrucomicrobiales</i> | <i>Verrucomicrobiaceae</i> | <i>Akkermansia</i>   | 1,98358E-05 | 0,0002378<br>14 | 0,04099<br>7061 |
| <i>Bacteria</i> | <i>Proteobacteria</i>  | <i>Betaproteobacteria</i>  | <i>Burkholderiales</i>    | <i>Comamonadaceae</i>      | <i>Albidiferax</i>   | 0           | 1,48386E-<br>06 | 0,34957<br>4806 |
| <i>Bacteria</i> | <i>Proteobacteria</i>  | <i>Betaproteobacteria</i>  | <i>Burkholderiales</i>    | <i>Alcaligenaceae</i>      | <i>Alcaligenes</i>   | 5,36476E-05 | 2,91662E-<br>07 | 0,01311<br>5904 |
| <i>Bacteria</i> | <i>Proteobacteria</i>  | <i>Gammaproteobacteria</i> | <i>Alteromonadales</i>    | <i>Alteromonadaceae</i>    | <i>Alishewanella</i> | 0,000001393 | 4,79871E-<br>06 | 1               |
| <i>Bacteria</i> | <i>Bacteroidetes</i>   | <i>Bacteroidia</i>         | <i>Bacteroidales</i>      | <i>Rikenellaceae</i>       | <i>Alistipes</i>     | 0,000157418 | 1,40027E-<br>05 | 0,00218<br>3045 |
| <i>Bacteria</i> | <i>Bacteroidetes</i>   | <i>Bacteroidia</i>         | <i>Bacteroidales</i>      | <i>Marinilabiaceae</i>     | <i>Alkaliflexus</i>  | 0           | 4,19887E-<br>06 | 0,34957<br>4806 |
| <i>Bacteria</i> | <i>Bacteroidetes</i>   | <i>Bacteroidia</i>         | <i>Bacteroidales</i>      | <i>Marinilabiliaceae</i>   | <i>Alkalitalea</i>   | 0           | 4,73698E-<br>07 | 0,34957<br>4806 |
| <i>Bacteria</i> | <i>Proteobacteria</i>  | <i>Gammaproteobacteria</i> | <i>Pseudomonadales</i>    | <i>Moraxellaceae</i>       | <i>Alkanindiges</i>  | 2,43212E-05 | 6,25013E-<br>06 | 0,69529<br>8567 |
| <i>Bacteria</i> | <i>Firmicutes</i>      | <i>Negativicutes</i>       | <i>Selenomonadales</i>    | <i>Veillonellaceae</i>     | <i>Allisonella</i>   | 7,17768E-06 | 0,0003782<br>33 | 0,02046<br>2223 |

|                 |                       |                            |                           |                                        |                           |             |             |             |
|-----------------|-----------------------|----------------------------|---------------------------|----------------------------------------|---------------------------|-------------|-------------|-------------|
| <i>Bacteria</i> | <i>Firmicutes</i>     | <i>Erysipelotrichia</i>    | <i>Erysipelotrichales</i> | <i>Erysipelotrichaceae</i>             | <i>Allobaculum</i>        | 0,000000862 | 4,42176E-07 | 0,844911363 |
| <i>Bacteria</i> | <i>Firmicutes</i>     | <i>Bacilli</i>             | <i>Lactobacillales</i>    | <i>Carnobacteriaceae</i>               | <i>Alloiococcus</i>       | 1,97927E-05 | 0,000363317 | 0,79400268  |
| <i>Bacteria</i> | <i>Proteobacteria</i> | <i>Gammaproteobacteria</i> | <i>Vibrionales</i>        | <i>Vibrionaceae</i>                    | <i>Allomonas</i>          | 3,86271E-05 | 0           | 0,117601295 |
| <i>Bacteria</i> | <i>Bacteroidetes</i>  | <i>Bacteroidia</i>         | <i>Bacteroidales</i>      | <i>Prevotellaceae</i>                  | <i>Alloprevotella</i>     | 0,00048278  | 0,018995671 | 0,064077507 |
| <i>Bacteria</i> | <i>Proteobacteria</i> | <i>Betaproteobacteria</i>  | <i>Neisseriales</i>       | <i>Neisseriaceae</i>                   | <i>Alysiella</i>          | 0,000533679 | 3,99027E-05 | 0,706491451 |
| <i>Bacteria</i> | <i>Proteobacteria</i> | <i>Alphaproteobacteria</i> | <i>Rhodobacterales</i>    | <i>Rhodobacteraceae</i>                | <i>Amaricoccus</i>        | 1,66233E-05 | 0           | 0,117601295 |
| <i>Bacteria</i> | <i>Firmicutes</i>     | <i>Clostridia</i>          | <i>Clostridiales</i>      | <i>Clostridiaceae 1</i>                | <i>Anaerobacter</i>       | 1,90093E-05 | 5,64288E-05 | 0,082579274 |
| <i>Bacteria</i> | <i>Proteobacteria</i> | <i>Gammaproteobacteria</i> | <i>Aeromonadales</i>      | <i>Succinivibrionaceae</i>             | <i>Anaerobiospirillum</i> | 0           | 7,36337E-05 | 0,037588881 |
| <i>Bacteria</i> | <i>Firmicutes</i>     | <i>Clostridia</i>          | <i>Clostridiales</i>      | <i>Clostridiales_Incertae_Sedis XI</i> | <i>Anaerococcus</i>       | 0,000135921 | 0,000346854 | 0,813663716 |
| <i>Bacteria</i> | <i>Firmicutes</i>     | <i>Clostridia</i>          | <i>Clostridiales</i>      | <i>Ruminococcaceae</i>                 | <i>Anaerofilum</i>        | 1,84716E-05 | 2,25993E-05 | 0,473289465 |
| <i>Bacteria</i> | <i>Firmicutes</i>     | <i>Clostridia</i>          | <i>Clostridiales</i>      | <i>Eubacteriaceae</i>                  | <i>Anaerofustis</i>       | 0           | 3,78847E-06 | 0,037588881 |
| <i>Bacteria</i> | <i>Firmicutes</i>     | <i>Negativicutes</i>       | <i>Selenomonadales</i>    | <i>Veillonellaceae</i>                 | <i>Anaeroglobus</i>       | 0           | 1,97729E-06 | 0,082355525 |
| <i>Bacteria</i> | <i>Proteobacteria</i> | <i>Deltaproteobacteria</i> | <i>Myxococcales</i>       | <i>Cystobacteraceae</i>                | <i>Anaeromyxobacter</i>   | 0           | 1,8518E-06  | 0,349574806 |
| <i>Bacteria</i> | <i>Bacteroidetes</i>  | <i>Bacteroidia</i>         | <i>Bacteroidales</i>      | <i>Marinilabiaceae</i>                 | <i>Anaerophaga</i>        | 0,000179729 | 0,003246126 | 0,036566184 |
| <i>Bacteria</i> | <i>Tenericutes</i>    | <i>Mollicutes</i>          | <i>Anaeroplasmatales</i>  | <i>Anaeroplasmataceae</i>              | <i>Anaeroplasma</i>       | 5,59218E-05 | 0,00015883  | 0,765087193 |
| <i>Bacteria</i> | <i>Bacteroidetes</i>  | <i>Bacteroidia</i>         | <i>Bacteroidales</i>      | <i>Bacteroidaceae</i>                  | <i>Anaerorhabdus</i>      | 0           | 2,24169E-06 | 0,17090352  |
| <i>Bacteria</i> | <i>Firmicutes</i>     | <i>Clostridia</i>          | <i>Clostridiales</i>      | <i>Incertae Sedis XI</i>               | <i>Anaerosphaera</i>      | 8,75623E-06 | 4,28835E-06 | 0,740726595 |
| <i>Bacteria</i> | <i>Firmicutes</i>     | <i>Clostridia</i>          | <i>Clostridiales</i>      | <i>Clostridiaceae 1</i>                | <i>Anaerosporobacter</i>  | 4,77613E-06 | 0,000100381 | 0,007280692 |

|                 |                        |                              |                            |                                              |                            |             |                 |                 |
|-----------------|------------------------|------------------------------|----------------------------|----------------------------------------------|----------------------------|-------------|-----------------|-----------------|
| <i>Bacteria</i> | <i>Firmicutes</i>      | <i>Clostridia</i>            | <i>Clostridiales</i>       | <i>Lachnospiraceae</i>                       | <i>Anaerostipes</i>        | 6,89563E-05 | 0,0001539<br>87 | 1               |
| <i>Bacteria</i> | <i>Firmicutes</i>      | <i>Clostridia</i>            | <i>Clostridiales</i>       | <i>Ruminococcaceae</i>                       | <i>Anaerotruncus</i>       | 9,9237E-06  | 5,35615E-<br>05 | 0,09426<br>4307 |
| <i>Bacteria</i> | <i>Firmicutes</i>      | <i>Negativicutes</i>         | <i>Selenomonadales</i>     | <i>Veillonellaceae</i>                       | <i>Anaerovibrio</i>        | 0,000112203 | 0,0100874<br>87 | 0,03724<br>2545 |
| <i>Bacteria</i> | <i>Firmicutes</i>      | <i>Clostridia</i>            | <i>Clostridiales</i>       | <i>Clostridiales_Incertae<br/>Sedis XIII</i> | <i>Anaerovorax</i>         | 2,32093E-05 | 0,0005313<br>62 | 0,00381<br>3532 |
| <i>Bacteria</i> | <i>Firmicutes</i>      | <i>Bacilli</i>               | <i>Bacillales</i>          | <i>Bacillaceae 1</i>                         | <i>Anoxybacillus</i>       | 8,76192E-07 | 0               | 0,28504<br>9407 |
| <i>Bacteria</i> | <i>Proteobacteria</i>  | <i>Betaproteobacteria</i>    | <i>Burkholderiales</i>     | <i>Burkholderiales_incertae_<br/>sedis</i>   | <i>Aquabacterium</i>       | 2,17767E-05 | 7,42095E-<br>07 | 0,33476<br>4268 |
| <i>Bacteria</i> | <i>Proteobacteria</i>  | <i>Alphaproteobacteria</i>   | <i>Rhizobiales</i>         | <i>Phyllobacteriaceae</i>                    | <i>Aquamicrobium</i>       | 1,41546E-05 | 2,09943E-<br>06 | 0,45657<br>0763 |
| <i>Bacteria</i> | <i>Actinobacteria</i>  | <i>Actinobacteria</i>        | <i>Actinomycetales</i>     | <i>Actinomycetaceae</i>                      | <i>Arcanobacterium</i>     | 8,15922E-06 | 0,0002629<br>03 | 0,37285<br>7936 |
| <i>Bacteria</i> | <i>Proteobacteria</i>  | <i>Epsilonproteobacteria</i> | <i>Campylobacterales</i>   | <i>Campylobacteraceae</i>                    | <i>Arcobacter</i>          | 0,003726715 | 0,0001773<br>86 | 0,48352<br>206  |
| <i>Bacteria</i> | <i>Armatimonadetes</i> | <i>Armatimonadetes_gp5</i>   | <i>Armatimonadetes_gp5</i> | <i>Armatimonadetes_gp5</i>                   | <i>Armatimonadetes_gp5</i> | 5,14343E-05 | 0               | 0,01748<br>4674 |
| <i>Bacteria</i> | <i>Actinobacteria</i>  | <i>Actinobacteria</i>        | <i>Actinomycetales</i>     | <i>Micrococcaceae</i>                        | <i>Arthrobacter</i>        | 6,80457E-05 | 2,37748E-<br>05 | 0,14323<br>4908 |
| <i>Bacteria</i> | <i>Tenericutes</i>     | <i>Mollicutes</i>            | <i>Anaeroplasmatales</i>   | <i>Anaeroplasmataceae</i>                    | <i>Asteroleplasma</i>      | 0,000024146 | 0,0012113<br>65 | 0,05582<br>9295 |
| <i>Bacteria</i> | <i>Proteobacteria</i>  | <i>Alphaproteobacteria</i>   | <i>Caulobacterales</i>     | <i>Caulobacteraceae</i>                      | <i>Asticcacaulis</i>       | 3,02417E-06 | 7,86281E-<br>07 | 0,76643<br>2717 |
| <i>Bacteria</i> | <i>Firmicutes</i>      | <i>Bacilli</i>               | <i>Lactobacillales</i>     | <i>Carnobacteriaceae</i>                     | <i>Atopobacter</i>         | 0,00000362  | 3,22388E-<br>06 | 0,90010<br>8638 |
| <i>Bacteria</i> | <i>Actinobacteria</i>  | <i>Actinobacteria</i>        | <i>Coriobacteriales</i>    | <i>Coriobacteriaceae</i>                     | <i>Atopobium</i>           | 5,44437E-06 | 3,25256E-<br>06 | 0,74072<br>6595 |
| <i>Bacteria</i> | <i>Firmicutes</i>      | <i>Bacilli</i>               | <i>Lactobacillales</i>     | <i>Carnobacteriaceae</i>                     | <i>Atopostipes</i>         | 5,03444E-05 | 0               | 0,04710<br>5791 |
| <i>Bacteria</i> | <i>Proteobacteria</i>  | <i>Alphaproteobacteria</i>   | <i>Rhizobiales</i>         | <i>Aurantimonadaceae</i>                     | <i>Aurantimonas</i>        | 1,22498E-05 | 0               | 0,28504<br>9407 |
| <i>Bacteria</i> | <i>Proteobacteria</i>  | <i>Betaproteobacteria</i>    | <i>Rhodocyclales</i>       | <i>Rhodocyclaceae</i>                        | <i>Azoarcus</i>            | 0           | 0,0000035<br>99 | 0,34957<br>4806 |

|                 |                       |                            |                           |                            |                        |             |                 |                 |
|-----------------|-----------------------|----------------------------|---------------------------|----------------------------|------------------------|-------------|-----------------|-----------------|
| <i>Bacteria</i> | <i>Proteobacteria</i> | <i>Gammaproteobacteria</i> | <i>Pseudomonadales</i>    | <i>Pseudomonadaceae</i>    | <i>Azomonas</i>        | 0,000006042 | 0               | 0,04710<br>5791 |
| <i>Bacteria</i> | <i>Proteobacteria</i> | <i>Gammaproteobacteria</i> | <i>Pseudomonadales</i>    | <i>Pseudomonadaceae</i>    | <i>Azorhizophilus</i>  | 4,77613E-06 | 0               | 0,28504<br>9407 |
| <i>Bacteria</i> | <i>Firmicutes</i>     | <i>Bacilli</i>             | <i>Bacillales</i>         | <i>Bacillaceae 1</i>       | <i>Bacillus</i>        | 0,000289558 | 2,48493E-05     | 0,01061<br>4291 |
| <i>Bacteria</i> | <i>Bacteroidetes</i>  | <i>Bacteroidia</i>         | <i>Bacteroidales</i>      | <i>Bacteroidaceae</i>      | <i>Bacteroides</i>     | 0,001139096 | 0,0024381<br>11 | 0,41788<br>6964 |
| <i>Bacteria</i> | <i>Bacteroidetes</i>  | <i>Bacteroidia</i>         | <i>Bacteroidales</i>      | <i>Porphyromonadaceae</i>  | <i>Barnesiella</i>     | 0,001050761 | 0,0200440<br>29 | 0,04914<br>0834 |
| <i>Bacteria</i> | <i>Proteobacteria</i> | <i>Gammaproteobacteria</i> | <i>Pasteurellales</i>     | <i>Pasteurellaceae</i>     | <i>Basfia</i>          | 0           | 4,42176E-07     | 0,34957<br>4806 |
| <i>Bacteria</i> | <i>Firmicutes</i>     | <i>Bacilli</i>             | <i>Lactobacillales</i>    | <i>Enterococcaceae</i>     | <i>Bavariicoccus</i>   | 1,87951E-05 | 4,3619E-06      | 0,65591<br>049  |
| <i>Bacteria</i> | <i>Proteobacteria</i> | <i>Betaproteobacteria</i>  | <i>Neisseriales</i>       | <i>Neisseriaceae</i>       | <i>Bergeriella</i>     | 3,62737E-05 | 5,28418E-05     | 0,56248<br>4662 |
| <i>Bacteria</i> | <i>Bacteroidetes</i>  | <i>Flavobacteriia</i>      | <i>Flavobacteriales</i>   | <i>Flavobacteriaceae</i>   | <i>Bergeyella</i>      | 0,232747015 | 0,0436960<br>28 | 0,00262<br>1822 |
| <i>Bacteria</i> | <i>Proteobacteria</i> | <i>Gammaproteobacteria</i> | <i>Pasteurellales</i>     | <i>Pasteurellaceae</i>     | <i>Bibersteinia</i>    | 7,00205E-06 | 0,0000287<br>71 | 0,29327<br>0727 |
| <i>Bacteria</i> | <i>Actinobacteria</i> | <i>Actinobacteria</i>      | <i>Bifidobacteriales</i>  | <i>Bifidobacteriaceae</i>  | <i>Bifidobacterium</i> | 6,95368E-06 | 6,36513E-05     | 0,06727<br>7961 |
| <i>Bacteria</i> | <i>Proteobacteria</i> | <i>Deltaproteobacteria</i> | <i>Desulfovibrionales</i> | <i>Desulfovibrionaceae</i> | <i>Bilophila</i>       | 1,22731E-05 | 0,0001949<br>52 | 0,02046<br>2223 |
| <i>Bacteria</i> | <i>Planctomycetes</i> | <i>Planctomycetia</i>      | <i>Planctomycetales</i>   | <i>Planctomycetaceae</i>   | <i>Blastopirellula</i> | 0           | 1,0299E-06      | 0,17090<br>352  |
| <i>Bacteria</i> | <i>Firmicutes</i>     | <i>Clostridia</i>          | <i>Clostridiales</i>      | <i>Lachnospiraceae</i>     | <i>Blautia</i>         | 0,000272265 | 0,0056028<br>77 | 0,08257<br>9274 |
| <i>Bacteria</i> | <i>Proteobacteria</i> | <i>Betaproteobacteria</i>  | <i>Burkholderiales</i>    | <i>Alcaligenaceae</i>      | <i>Bordetella</i>      | 7,76121E-06 | 6,14968E-06     | 0,74072<br>6595 |
| <i>Bacteria</i> | <i>Proteobacteria</i> | <i>Alphaproteobacteria</i> | <i>Rhizobiales</i>        | <i>Bradyrhizobiaceae</i>   | <i>Bosea</i>           | 3,06667E-06 | 0,0008582<br>09 | 0,00502<br>0543 |
| <i>Bacteria</i> | <i>Actinobacteria</i> | <i>Actinobacteria</i>      | <i>Actinomycetales</i>    | <i>Dermabacteraceae</i>    | <i>Brachybacterium</i> | 0,000116245 | 0,0002109<br>55 | 0,72609<br>5162 |
| <i>Bacteria</i> | <i>Proteobacteria</i> | <i>Betaproteobacteria</i>  | <i>Burkholderiales</i>    | <i>Comamonadaceae</i>      | <i>Brachymonas</i>     | 6,28151E-06 | 3,72161E-05     | 0,88193<br>0721 |

|                 |                       |                              |                              |                              |                              |             |             |             |
|-----------------|-----------------------|------------------------------|------------------------------|------------------------------|------------------------------|-------------|-------------|-------------|
| <i>Bacteria</i> | <i>Spirochaetes</i>   | <i>Spirochaetia</i>          | <i>Spirochaetales</i>        | <i>Brachyspiraceae</i>       | <i>Brachyspira</i>           | 0           | 9,25898E-07 | 0,349574806 |
| <i>Bacteria</i> | <i>Proteobacteria</i> | <i>Alphaproteobacteria</i>   | <i>Rhizobiales</i>           | <i>Bradyrhizobiaceae</i>     | <i>Bradyrhizobium</i>        | 0           | 1,46713E-05 | 0,037588881 |
| <i>Bacteria</i> | <i>Actinobacteria</i> | <i>Actinobacteria</i>        | <i>Actinomycetales</i>       | <i>Brevibacteriaceae</i>     | <i>Brevibacterium</i>        | 0,000125586 | 3,89682E-05 | 0,013328329 |
| <i>Bacteria</i> | <i>Proteobacteria</i> | <i>Alphaproteobacteria</i>   | <i>Caulobacterales</i>       | <i>Caulobacteraceae</i>      | <i>Brevundimonas</i>         | 0,000634013 | 7,50335E-06 | 0,000967429 |
| <i>Bacteria</i> | <i>Firmicutes</i>     | <i>Bacilli</i>               | <i>Bacillales</i>            | <i>Listeriaceae</i>          | <i>Brochothrix</i>           | 2,28778E-05 | 0           | 0,285049407 |
| <i>Bacteria</i> | <i>Actinobacteria</i> | <i>Actinobacteria</i>        | <i>Actinomycetales</i>       | <i>Propionibacteriaceae</i>  | <i>Brooklawnia</i>           | 0           | 2,82927E-06 | 0,082355525 |
| <i>Bacteria</i> | <i>Proteobacteria</i> | <i>Alphaproteobacteria</i>   | <i>Rhizobiales</i>           | <i>Brucellaceae</i>          | <i>Brucella</i>              | 7,51376E-06 | 0           | 0,000440292 |
| <i>Bacteria</i> | <i>Firmicutes</i>     | <i>Erysipelotrichia</i>      | <i>Erysipelotrichales</i>    | <i>Erysipelotrichaceae</i>   | <i>Bulleidia</i>             | 4,98691E-05 | 0,001675337 | 0,027750993 |
| <i>Bacteria</i> | <i>Firmicutes</i>     | <i>Clostridia</i>            | <i>Clostridiales</i>         | <i>Ruminococcaceae</i>       | <i>Butyricoccus</i>          | 0,000155912 | 0,001132204 | 0,064077507 |
| <i>Bacteria</i> | <i>Bacteroidetes</i>  | <i>Bacteroidia</i>           | <i>Bacteroidales</i>         | <i>Porphyromonadaceae</i>    | <i>Butyricimonas</i>         | 0,000016587 | 0,000193007 | 0,22251223  |
| <i>Bacteria</i> | <i>Firmicutes</i>     | <i>Clostridia</i>            | <i>Clostridiales</i>         | <i>Lachnospiraceae</i>       | <i>Butyrivibrio</i>          | 0           | 0,000532976 | 0,000636299 |
| <i>Bacteria</i> | <i>Proteobacteria</i> | <i>Epsilonproteobacteria</i> | <i>Campylobacterales</i>     | <i>Campylobacteraceae</i>    | <i>Campylobacter</i>         | 7,01854E-05 | 0,018825711 | 0,020524464 |
| <i>Bacteria</i> | <i>Proteobacteria</i> | <i>Gammaproteobacteria</i>   | <i>Candidatus Carsonella</i> | <i>Candidatus Carsonella</i> | <i>Candidatus Carsonella</i> | 4,22904E-05 | 4,87934E-06 | 0,002807439 |
| <i>Bacteria</i> | <i>Proteobacteria</i> | <i>Betaproteobacteria</i>    | <i>Burkholderiales</i>       | <i>Alcaligenaceae</i>        | <i>Candidimonas</i>          | 6,36817E-06 | 0           | 0,285049407 |
| <i>Bacteria</i> | <i>Bacteroidetes</i>  | <i>Flavobacteriia</i>        | <i>Flavobacteriales</i>      | <i>Flavobacteriaceae</i>     | <i>Capnocytophaga</i>        | 1,88001E-05 | 8,67288E-06 | 0,408368921 |
| <i>Bacteria</i> | <i>Firmicutes</i>     | <i>Bacilli</i>               | <i>Lactobacillales</i>       | <i>Carnobacteriaceae</i>     | <i>Carnobacterium</i>        | 9,18491E-06 | 0           | 0,285049407 |
| <i>Bacteria</i> | <i>Firmicutes</i>     | <i>Bacilli</i>               | <i>Bacillales</i>            | <i>Planococcaceae</i>        | <i>Caryophanon</i>           | 4,27148E-05 | 6,73019E-05 | 1           |
| <i>Bacteria</i> | <i>Proteobacteria</i> | <i>Betaproteobacteria</i>    | <i>Burkholderiales</i>       | <i>Alcaligenaceae</i>        | <i>Castellaniella</i>        | 2,78607E-05 | 0           | 0,285049407 |

|                 |                       |                            |                           |                              |                                  |             |             |             |
|-----------------|-----------------------|----------------------------|---------------------------|------------------------------|----------------------------------|-------------|-------------|-------------|
| <i>Bacteria</i> | <i>Firmicutes</i>     | <i>Bacilli</i>             | <i>Lactobacillales</i>    | <i>Carnobacteriaceae</i>     | <i>Catelicoccus</i>              | 3,40273E-07 | 5,99838E-07 | 1           |
| <i>Bacteria</i> | <i>Firmicutes</i>     | <i>Erysipelotrichia</i>    | <i>Erysipelotrichales</i> | <i>Erysipelotrichaceae</i>   | <i>Catenibacterium</i>           | 0,000140752 | 0,001354201 | 0,082579274 |
| <i>Bacteria</i> | <i>Firmicutes</i>     | <i>Clostridia</i>          | <i>Clostridiales</i>      | <i>Lachnospiraceae</i>       | <i>Catonella</i>                 | 1,60714E-05 | 9,54332E-06 | 1           |
| <i>Bacteria</i> | <i>Actinobacteria</i> | <i>Actinobacteria</i>      | <i>Actinomycetales</i>    | <i>Cellulomonadaceae</i>     | <i>Cellulomonas</i>              | 1,31429E-06 | 0           | 0,285049407 |
| <i>Bacteria</i> | <i>Firmicutes</i>     | <i>Clostridia</i>          | <i>Clostridiales</i>      | <i>Ruminococcaceae</i>       | <i>Cellulosibacter</i>           | 0           | 1,09779E-05 | 0,006111784 |
| <i>Bacteria</i> | <i>Firmicutes</i>     | <i>Clostridia</i>          | <i>Clostridiales</i>      | <i>Lachnospiraceae</i>       | <i>Cellulosilyticum</i>          | 0           | 2,02009E-05 | 0,037588881 |
| <i>Bacteria</i> | <i>Proteobacteria</i> | <i>Gammaproteobacteria</i> | <i>Pseudomonadales</i>    | <i>Pseudomonadaceae</i>      | <i>Cellvibrio</i>                | 5,23914E-06 | 0           | 0,117601295 |
| <i>Bacteria</i> | <i>Firmicutes</i>     | <i>Bacilli</i>             | <i>Bacillales</i>         | <i>Bacillaceae 2</i>         | <i>Cerasibacillus</i>            | 6,57144E-07 | 0           | 0,285049407 |
| <i>Bacteria</i> | <i>Fusobacteria</i>   | <i>Fusobacteriia</i>       | <i>Fusobacteriales</i>    | <i>Fusobacteriaceae</i>      | <i>Cetobacterium</i>             | 1,36109E-06 | 5,09863E-06 | 1           |
| <i>Bacteria</i> | <i>Bacteroidetes</i>  | <i>Flavobacteriia</i>      | <i>Flavobacteriales</i>   | <i>Flavobacteriaceae</i>     | <i>Chryseobacterium</i>          | 0,000128699 | 0,00014261  | 0,282058876 |
| <i>Bacteria</i> | <i>Proteobacteria</i> | <i>Gammaproteobacteria</i> | <i>Enterobacteriales</i>  | <i>Enterobacteriaceae</i>    | <i>Citrobacter</i>               | 6,20085E-05 | 5,38548E-05 | 0,018422126 |
| <i>Bacteria</i> | <i>Synergistetes</i>  | <i>Synergistia</i>         | <i>Synergistales</i>      | <i>Synergistaceae</i>        | <i>Cloacibacillus</i>            | 7,06474E-05 | 0,000244115 | 0,706491451 |
| <i>Bacteria</i> | <i>Bacteroidetes</i>  | <i>Flavobacteriia</i>      | <i>Flavobacteriales</i>   | <i>Flavobacteriaceae</i>     | <i>Cloacibacterium</i>           | 0,000168514 | 0           | 0,005853245 |
| <i>Bacteria</i> | <i>Firmicutes</i>     | <i>Clostridia</i>          | <i>Clostridiales</i>      | <i>Ruminococcaceae</i>       | <i>Clostridium III</i>           | 4,23919E-06 | 4,32807E-05 | 0,023856401 |
| <i>Bacteria</i> | <i>Firmicutes</i>     | <i>Clostridia</i>          | <i>Clostridiales</i>      | <i>Ruminococcaceae</i>       | <i>Clostridium IV</i>            | 0,000278252 | 0,003695407 | 0,132463567 |
| <i>Bacteria</i> | <i>Firmicutes</i>     | <i>Clostridia</i>          | <i>Clostridiales</i>      | <i>Clostridiaceae 1</i>      | <i>Clostridium sensu stricto</i> | 0,004729025 | 0,004227616 | 0,562833754 |
| <i>Bacteria</i> | <i>Firmicutes</i>     | <i>Clostridia</i>          | <i>Clostridiales</i>      | <i>Peptostreptococcaceae</i> | <i>Clostridium XI</i>            | 0,003988915 | 0,001739411 | 0,020637558 |
| <i>Bacteria</i> | <i>Fusobacteria</i>   | <i>Fusobacteriia</i>       | <i>Fusobacteriales</i>    | <i>Fusobacteriaceae</i>      | <i>Clostridium XIX</i>           | 5,28246E-06 | 0,00000271  | 0,695298567 |



|                 |                                 |                           |                           |                            |                          |             |                 |                 |
|-----------------|---------------------------------|---------------------------|---------------------------|----------------------------|--------------------------|-------------|-----------------|-----------------|
| <i>Bacteria</i> | <i>Firmicutes</i>               | <i>Clostridia</i>         | <i>Clostridiales</i>      | <i>Lachnospiraceae</i>     | <i>Clostridium XIVa</i>  | 0,001371008 | 0,0083694<br>1  | 0,10519<br>2505 |
| <i>Bacteria</i> | <i>Firmicutes</i>               | <i>Clostridia</i>         | <i>Clostridiales</i>      | <i>Lachnospiraceae</i>     | <i>Clostridium XIVb</i>  | 0,000101329 | 0,0005721<br>36 | 0,20139<br>9822 |
| <i>Bacteria</i> | <i>Firmicutes</i>               | <i>Erysipelotrichia</i>   | <i>Erysipelotrichales</i> | <i>Erysipelotrichaceae</i> | <i>Clostridium XVIII</i> | 2,19658E-05 | 4,62949E-<br>07 | 0,04571<br>4365 |
| <i>Bacteria</i> | <i>Actinobacteria</i>           | <i>Actinobacteria</i>     | <i>Coriobacteriales</i>   | <i>Coriobacteriaceae</i>   | <i>Collinsella</i>       | 3,16375E-05 | 0               | 0,00585<br>3245 |
| <i>Bacteria</i> | <i>Proteobacteria</i>           | <i>Betaproteobacteria</i> | <i>Burkholderiales</i>    | <i>Comamonadaceae</i>      | <i>Comamonas</i>         | 0,001623778 | 7,65938E-<br>05 | 0,01499<br>7039 |
| <i>Bacteria</i> | <i>Proteobacteria</i>           | <i>Betaproteobacteria</i> | <i>Neisseriales</i>       | <i>Neisseriaceae</i>       | <i>Conchiformibius</i>   | 2,12693E-05 | 0               | 0,04710<br>5791 |
| <i>Bacteria</i> | <i>Firmicutes</i>               | <i>Erysipelotrichia</i>   | <i>Erysipelotrichales</i> | <i>Erysipelotrichaceae</i> | <i>Coprobacillus</i>     | 8,73837E-06 | 1,05067E-<br>06 | 0,65591<br>049  |
| <i>Bacteria</i> | <i>Firmicutes</i>               | <i>Clostridia</i>         | <i>Clostridiales</i>      | <i>Lachnospiraceae</i>     | <i>Coprococcus</i>       | 0,000221351 | 0,0015933<br>8  | 0,00777<br>3957 |
| <i>Bacteria</i> | <i>Verrucomicrobia</i>          | <i>Opitutae</i>           | <i>Puniceococcales</i>    | <i>Puniceococcaceae</i>    | <i>Coralimargarita</i>   | 0           | 6,92428E-<br>06 | 0,17090<br>352  |
| <i>Bacteria</i> | <i>Actinobacteria</i>           | <i>Actinobacteria</i>     | <i>Actinomycetales</i>    | <i>Corynebacteriaceae</i>  | <i>Corynebacterium</i>   | 0,001968928 | 0,0033799<br>73 | 0,29762<br>1468 |
| <i>Bacteria</i> | <i>Bacteroidetes</i>            | <i>Flavobacteriia</i>     | <i>Flavobacteriales</i>   | <i>Flavobacteriaceae</i>   | <i>Cruoricaptor</i>      | 0           | 1,20268E-<br>06 | 0,17090<br>352  |
| <i>Bacteria</i> | <i>Proteobacteria</i>           | <i>Betaproteobacteria</i> | <i>Burkholderiales</i>    | <i>Burkholderiaceae</i>    | <i>Cupriavidus</i>       | 0           | 2,78137E-<br>06 | 0,17090<br>352  |
| <i>Bacteria</i> | <i>Actinobacteria</i>           | <i>Actinobacteria</i>     | <i>Actinomycetales</i>    | <i>Microbacteriaceae</i>   | <i>Curtobacterium</i>    | 0           | 2,99919E-<br>07 | 0,34957<br>4806 |
| <i>Bacteria</i> | <i>Proteobacteria</i>           | <i>Betaproteobacteria</i> | <i>Rhodocyclales</i>      | <i>Rhodocyclaceae</i>      | <i>Dechloromonas</i>     | 2,11959E-06 | 0               | 0,28504<br>9407 |
| <i>Bacteria</i> | <i>Firmicutes</i>               | <i>Clostridia</i>         | <i>Clostridiales</i>      | <i>Defluviitaleaceae</i>   | <i>Defluviitalea</i>     | 3,06246E-06 | 7,10324E-<br>06 | 0,27030<br>6711 |
| <i>Bacteria</i> | <i>Deinococcus-<br/>Thermus</i> | <i>Deinococci</i>         | <i>Deinococcales</i>      | <i>Deinococcaceae</i>      | <i>Deinococcus</i>       | 6,57144E-06 | 1,07971E-<br>05 | 1               |
| <i>Bacteria</i> | <i>Proteobacteria</i>           | <i>Betaproteobacteria</i> | <i>Burkholderiales</i>    | <i>Comamonadaceae</i>      | <i>Delftia</i>           | 0,000143308 | 7,29849E-<br>05 | 0,04914<br>0834 |
| <i>Bacteria</i> | <i>Actinobacteria</i>           | <i>Actinobacteria</i>     | <i>Actinomycetales</i>    | <i>Demequinaceae</i>       | <i>Demequina</i>         | 0,000001791 | 0               | 0,28504<br>9407 |

|                 |                       |                            |                           |                            |                        |             |                 |                 |
|-----------------|-----------------------|----------------------------|---------------------------|----------------------------|------------------------|-------------|-----------------|-----------------|
| <i>Bacteria</i> | <i>Actinobacteria</i> | <i>Actinobacteria</i>      | <i>Actinomycetales</i>    | <i>Dermacoccaceae</i>      | <i>Dermacoccus</i>     | 3,03361E-05 | 0               | 0,04710<br>5791 |
| <i>Bacteria</i> | <i>Actinobacteria</i> | <i>Actinobacteria</i>      | <i>Actinomycetales</i>    | <i>Dermatophilaceae</i>    | <i>Dermatophilus</i>   | 0           | 0,0001206<br>15 | 0,08235<br>5525 |
| <i>Bacteria</i> | <i>Firmicutes</i>     | <i>Bacilli</i>             | <i>Lactobacillales</i>    | <i>Carnobacteriaceae</i>   | <i>Desemzia</i>        | 0           | 9,25898E-<br>07 | 0,34957<br>4806 |
| <i>Bacteria</i> | <i>Proteobacteria</i> | <i>Deltaproteobacteria</i> | <i>Desulfobacterales</i>  | <i>Desulfobulbaceae</i>    | <i>Desulfobulbus</i>   | 0           | 2,09943E-<br>06 | 0,34957<br>4806 |
| <i>Bacteria</i> | <i>Proteobacteria</i> | <i>Deltaproteobacteria</i> | <i>Desulfovibrionales</i> | <i>Desulfovibrionaceae</i> | <i>Desulfovibrio</i>   | 7,28887E-05 | 0,0036121<br>45 | 0,04833<br>2655 |
| <i>Bacteria</i> | <i>Proteobacteria</i> | <i>Alphaproteobacteria</i> | <i>Rhizobiales</i>        | <i>Hyphomicrobiaceae</i>   | <i>Devosia</i>         | 1,45887E-05 | 8,99757E-<br>07 | 0,45657<br>0763 |
| <i>Bacteria</i> | <i>Firmicutes</i>     | <i>Negativicutes</i>       | <i>Selenomonadales</i>    | <i>Veillonellaceae</i>     | <i>Dialister</i>       | 7,16704E-05 | 0,0016642<br>06 | 0,40939<br>5486 |
| <i>Bacteria</i> | <i>Proteobacteria</i> | <i>Betaproteobacteria</i>  | <i>Burkholderiales</i>    | <i>Comamonadaceae</i>      | <i>Diaphorobacter</i>  | 6,11262E-05 | 4,34649E-<br>06 | 0,01017<br>7442 |
| <i>Bacteria</i> | <i>Actinobacteria</i> | <i>Actinobacteria</i>      | <i>Actinomycetales</i>    | <i>Dietziaceae</i>         | <i>Dietzia</i>         | 5,41814E-05 | 0               | 0,00585<br>3245 |
| <i>Bacteria</i> | <i>Firmicutes</i>     | <i>Bacilli</i>             | <i>Lactobacillales</i>    | <i>Carnobacteriaceae</i>   | <i>Dolosigranulum</i>  | 0           | 2,99919E-<br>07 | 0,34957<br>4806 |
| <i>Bacteria</i> | <i>Proteobacteria</i> | <i>Alphaproteobacteria</i> | <i>Rhodospirillales</i>   | <i>Rhodospirillaceae</i>   | <i>Dongia</i>          | 2,46823E-06 | 0               | 0,11760<br>1295 |
| <i>Bacteria</i> | <i>Firmicutes</i>     | <i>Clostridia</i>          | <i>Clostridiales</i>      | <i>Lachnospiraceae</i>     | <i>Dorea</i>           | 0,00018525  | 0,0012038<br>76 | 0,10519<br>2505 |
| <i>Bacteria</i> | <i>Bacteroidetes</i>  | <i>Bacteroidia</i>         | <i>Bacteroidales</i>      | <i>Porphyromonadaceae</i>  | <i>Dysgonomonas</i>    | 6,20335E-05 | 0,0000398<br>16 | 0,41455<br>3486 |
| <i>Bacteria</i> | <i>Bacteroidetes</i>  | <i>Flavobacteriia</i>      | <i>Flavobacteriales</i>   | <i>Flavobacteriaceae</i>   | <i>Elizabethkingia</i> | 0           | 0,0004520<br>84 | 0,00611<br>1784 |
| <i>Bacteria</i> | <i>Elusimicrobia</i>  | <i>Elusimicrobia</i>       | <i>Elusimicrobiales</i>   | <i>Elusimicrobiaceae</i>   | <i>Elusimicrobium</i>  | 2,43106E-05 | 0,0001356<br>28 | 0,05096<br>1937 |
| <i>Bacteria</i> | <i>Bacteroidetes</i>  | <i>Flavobacteriia</i>      | <i>Flavobacteriales</i>   | <i>Flavobacteriaceae</i>   | <i>Empedobacter</i>    | 0,000120925 | 0,0001031<br>45 | 0,71439<br>3038 |
| <i>Bacteria</i> | <i>Proteobacteria</i> | <i>Gammaproteobacteria</i> | <i>Pseudomonadales</i>    | <i>Moraxellaceae</i>       | <i>Enhydrobacter</i>   | 7,18973E-05 | 2,79956E-<br>05 | 0,17930<br>0898 |
| <i>Bacteria</i> | <i>Proteobacteria</i> | <i>Gammaproteobacteria</i> | <i>Enterobacteriales</i>  | <i>Enterobacteriaceae</i>  | <i>Enterobacter</i>    | 2,30968E-05 | 1,07794E-<br>06 | 0,88193<br>0721 |

|                 |                       |                            |                           |                                            |                                                |             |                 |                 |
|-----------------|-----------------------|----------------------------|---------------------------|--------------------------------------------|------------------------------------------------|-------------|-----------------|-----------------|
| <i>Bacteria</i> | <i>Firmicutes</i>     | <i>Bacilli</i>             | <i>Lactobacillales</i>    | <i>Enterococcaceae</i>                     | <i>Enterococcus</i>                            | 0,000312725 | 0,0002779<br>36 | 1               |
| <i>Bacteria</i> | <i>Actinobacteria</i> | <i>Actinobacteria</i>      | <i>Coriobacteriales</i>   | <i>Coriobacteriaceae</i>                   | <i>Enterorhabdus</i>                           | 0,000005877 | 7,39733E-<br>06 | 0,56254<br>8843 |
| <i>Bacteria</i> | <i>Firmicutes</i>     | <i>Erysipelotrichia</i>    | <i>Erysipelotrichales</i> | <i>Erysipelotrichaceae</i>                 | <i>Erysipelothrix</i>                          | 2,51857E-05 | 0,0001854<br>12 | 0,04833<br>2655 |
| <i>Bacteria</i> | <i>Firmicutes</i>     | <i>Erysipelotrichia</i>    | <i>Erysipelotrichales</i> | <i>Erysipelotrichaceae</i>                 | <i>Erysipelotrichaceae_i<br/>ncertae_sedis</i> | 0,000115114 | 0,0020377<br>31 | 0,04914<br>0834 |
| <i>Bacteria</i> | <i>Proteobacteria</i> | <i>Gammaproteobacteria</i> | <i>Enterobacteriales</i>  | <i>Enterobacteriaceae</i>                  | <i>Escherichia/Shigella</i>                    | 0,000992541 | 0,0117527<br>99 | 0,41788<br>6964 |
| <i>Bacteria</i> | <i>Firmicutes</i>     | <i>Clostridia</i>          | <i>Clostridiales</i>      | <i>Ruminococcaceae</i>                     | <i>Ethanoligenens</i>                          | 0           | 2,85123E-<br>05 | 0,00611<br>1784 |
| <i>Bacteria</i> | <i>Firmicutes</i>     | <i>Clostridia</i>          | <i>Clostridiales</i>      | <i>Eubacteriaceae</i>                      | <i>Eubacterium</i>                             | 0,000139422 | 0,0065752<br>3  | 0,02789<br>0529 |
| <i>Bacteria</i> | <i>Firmicutes</i>     | <i>Bacilli</i>             | <i>Bacillales</i>         | <i>Bacillales_Incertae Sedis<br/>XII</i>   | <i>Exiguobacterium</i>                         | 6,24715E-06 | 0               | 0,11760<br>1295 |
| <i>Bacteria</i> | <i>Firmicutes</i>     | <i>Bacilli</i>             | <i>Lactobacillales</i>    | <i>Aerococcaceae</i>                       | <i>Facklamia</i>                               | 0,000315975 | 0,0003673<br>23 | 0,02650<br>5644 |
| <i>Bacteria</i> | <i>Firmicutes</i>     | <i>Clostridia</i>          | <i>Clostridiales</i>      | <i>Ruminococcaceae</i>                     | <i>Faecalibacterium</i>                        | 0,000216487 | 0,0141287<br>83 | 0,01089<br>6354 |
| <i>Bacteria</i> | <i>Firmicutes</i>     | <i>Clostridia</i>          | <i>Clostridiales</i>      | <i>Ruminococcaceae</i>                     | <i>Fastidiosipila</i>                          | 1,84454E-05 | 0,0001154<br>7  | 0,62558<br>5232 |
| <i>Bacteria</i> | <i>Fibrobacteres</i>  | <i>Fibrobacteria</i>       | <i>Fibrobacterales</i>    | <i>Fibrobacteraceae</i>                    | <i>Fibrobacter</i>                             | 7,59818E-05 | 0,0010928<br>8  | 0,07709<br>9872 |
| <i>Bacteria</i> | <i>Firmicutes</i>     | <i>Clostridia</i>          | <i>Clostridiales</i>      | <i>Peptostreptococcaceae</i>               | <i>Filifactor</i>                              | 3,16835E-05 | 3,17815E-<br>06 | 0,65591<br>049  |
| <i>Bacteria</i> | <i>Bacteroidetes</i>  | <i>Sphingobacteriia</i>    | <i>Sphingobacteriales</i> | <i>Chitinophagaceae</i>                    | <i>Filimonas</i>                               | 2,88376E-05 | 1,04998E-<br>05 | 0,11304<br>8724 |
| <i>Bacteria</i> | <i>Firmicutes</i>     | <i>Clostridia</i>          | <i>Clostridiales</i>      | <i>Clostridiales_Incertae<br/>Sedis XI</i> | <i>Finegoldia</i>                              | 2,06313E-05 | 0,0000102<br>71 | 0,76643<br>2717 |
| <i>Bacteria</i> | <i>Bacteroidetes</i>  | <i>Sphingobacteriia</i>    | <i>Sphingobacteriales</i> | <i>Chitinophagaceae</i>                    | <i>Flavihumibacter</i>                         | 3,40273E-07 | 0               | 0,28504<br>9407 |
| <i>Bacteria</i> | <i>Bacteroidetes</i>  | <i>Sphingobacteriia</i>    | <i>Sphingobacteriales</i> | <i>Chitinophagaceae</i>                    | <i>Flavitalea</i>                              | 1,30143E-06 | 0               | 0,28504<br>9407 |
| <i>Bacteria</i> | <i>Bacteroidetes</i>  | <i>Flavobacteriia</i>      | <i>Flavobacteriales</i>   | <i>Flavobacteriaceae</i>                   | <i>Flavobacterium</i>                          | 0,001038177 | 6,01473E-<br>05 | 0,18859<br>3442 |

|                 |                              |                           |                         |                                            |                       |             |                 |                 |
|-----------------|------------------------------|---------------------------|-------------------------|--------------------------------------------|-----------------------|-------------|-----------------|-----------------|
| <i>Bacteria</i> | <i>Firmicutes</i>            | <i>Clostridia</i>         | <i>Clostridiales</i>    | <i>Ruminococcaceae</i>                     | <i>Flavonifractor</i> | 8,21808E-05 | 0,0017575<br>43 | 0,02063<br>7558 |
| <i>Bacteria</i> | <i>Bacteroidetes</i>         | <i>Flavobacteriia</i>     | <i>Flavobacteriales</i> | <i>Cryomorphaceae</i>                      | <i>Fluviicola</i>     | 9,57215E-05 | 0               | 0,28504<br>9407 |
| <i>Bacteria</i> | <i>Fusobacteria</i>          | <i>Fusobacteriia</i>      | <i>Fusobacteriales</i>  | <i>Fusobacteriaceae</i>                    | <i>Fusobacterium</i>  | 0,000955587 | 0,0002899<br>78 | 0,06407<br>7507 |
| <i>Bacteria</i> | <i>Firmicutes</i>            | <i>Clostridia</i>         | <i>Clostridiales</i>    | <i>Clostridiales_Incertae<br/>Sedis XI</i> | <i>Gallicola</i>      | 1,37536E-05 | 8,11067E-<br>05 | 0,80177<br>6827 |
| <i>Bacteria</i> | <i>Bacteroidetes</i>         | <i>Flavobacteriia</i>     | <i>Flavobacteriales</i> | <i>Flavobacteriaceae</i>                   | <i>Gelidibacter</i>   | 0           | 1,4996E-06      | 0,34957<br>4806 |
| <i>Bacteria</i> | <i>Firmicutes</i>            | <i>Bacilli</i>            | <i>Bacillales</i>       | <i>Bacillales_Incertae Sedis<br/>XI</i>    | <i>Gemella</i>        | 0,000272139 | 1,82939E-<br>05 | 0,22251<br>223  |
| <i>Bacteria</i> | <i>Planctomycetes</i>        | <i>Planctomycetia</i>     | <i>Planctomycetales</i> | <i>Planctomycetaceae</i>                   | <i>Gemmata</i>        | 1,29304E-05 | 0               | 0,28504<br>9407 |
| <i>Bacteria</i> | <i>Gemmatimonade<br/>tes</i> | <i>Gemmatimonadetes</i>   | <i>Gemmatimonadales</i> | <i>Gemmatimonadaceae</i>                   | <i>Gemmatimonas</i>   | 0,000000862 | 0               | 0,28504<br>9407 |
| <i>Bacteria</i> | <i>Firmicutes</i>            | <i>Clostridia</i>         | <i>Clostridiales</i>    | <i>Ruminococcaceae</i>                     | <i>Gemmiger</i>       | 0,00018848  | 0,0125043<br>24 | 0,01508<br>7256 |
| <i>Bacteria</i> | <i>Actinobacteria</i>        | <i>Actinobacteria</i>     | <i>Actinomycetales</i>  | <i>Bogoriellaceae</i>                      | <i>Georgenia</i>      | 0           | 2,91662E-<br>07 | 0,34957<br>4806 |
| <i>Bacteria</i> | <i>Bacteroidetes</i>         | <i>Flavobacteriia</i>     | <i>Flavobacteriales</i> | <i>Flavobacteriaceae</i>                   | <i>Gillisia</i>       | 0           | 4,73698E-<br>07 | 0,34957<br>4806 |
| <i>Bacteria</i> | <i>Firmicutes</i>            | <i>Bacilli</i>            | <i>Lactobacillales</i>  | <i>Aerococcaceae</i>                       | <i>Globicatella</i>   | 0,00020017  | 0,0017711<br>78 | 0,29589<br>0126 |
| <i>Bacteria</i> | <i>Actinobacteria</i>        | <i>Actinobacteria</i>     | <i>Actinomycetales</i>  | <i>Glycomycetaceae</i>                     | <i>Glycomyces</i>     | 1,97143E-06 | 0               | 0,28504<br>9407 |
| <i>Bacteria</i> | <i>Actinobacteria</i>        | <i>Actinobacteria</i>     | <i>Actinomycetales</i>  | <i>Nocardiaceae</i>                        | <i>Gordonia</i>       | 3,14576E-05 | 0               | 0,11760<br>1295 |
| <i>Bacteria</i> | <i>Actinobacteria</i>        | <i>Actinobacteria</i>     | <i>Coriobacteriales</i> | <i>Coriobacteriaceae</i>                   | <i>Gordonibacter</i>  | 0,000001724 | 3,66206E-<br>06 | 0,37285<br>7936 |
| <i>Bacteria</i> | <i>Acidobacteria</i>         | <i>Acidobacteria_Gp16</i> | <i>Gp16</i>             | <i>Gp16</i>                                | <i>Gp16</i>           | 8,54287E-06 | 0               | 0,28504<br>9407 |
| <i>Bacteria</i> | <i>Acidobacteria</i>         | <i>Acidobacteria_Gp6</i>  | <i>Gp6</i>              | <i>Gp6</i>                                 | <i>Gp6</i>            | 3,44809E-06 | 0               | 0,28504<br>9407 |
| <i>Bacteria</i> | <i>Acidobacteria</i>         | <i>Acidobacteria_Gp7</i>  | <i>Gp7</i>              | <i>Gp7</i>                                 | <i>Gp7</i>            | 3,18408E-06 | 0               | 0,28504<br>9407 |

|          |                           |                       |                    |                                  |                          |             |             |             |
|----------|---------------------------|-----------------------|--------------------|----------------------------------|--------------------------|-------------|-------------|-------------|
| Bacteria | Cyanobacteria/Chloroplast | Cyanobacteria         | Family I           | Family I                         | Gpl                      | 1,71022E-05 | 0           | 0,117601295 |
| Bacteria | Firmicutes                | Bacilli               | Lactobacillales    | Carnobacteriaceae                | Granulicatella           | 7,53363E-05 | 2,95999E-05 | 0,338979844 |
| Bacteria | Actinobacteria            | Actinobacteria        | Actinomycetales    | Propionibacteriaceae             | Granulicoccus            | 0           | 2,99919E-07 | 0,349574806 |
| Bacteria | Firmicutes                | Clostridia            | Clostridiales      | Clostridiales_Incertae Sedis XII | Guggenheimella           | 4,16191E-06 | 4,18101E-05 | 0,372857936 |
| Bacteria | Actinobacteria            | Actinobacteria        | Actinomycetales    | Microbacteriaceae                | Gulosibacter             | 4,57712E-06 | 2,99919E-07 | 0,844911363 |
| Bacteria | Proteobacteria            | Gammaproteobacteria   | Pasteurellales     | Pasteurellaceae                  | Haemophilus              | 0,138797358 | 0,028801318 | 0,015087256 |
| Bacteria | Bacteroidetes             | Bacteroidia           | Bacteroidales      | Prevotellaceae                   | Hallella                 | 2,08979E-05 | 0,002399751 | 0,027333767 |
| Bacteria | Actinobacteria            | Actinobacteria        | Actinomycetales    | Ruaniaceae                       | Haloactinobacterium      | 0           | 3,89895E-06 | 0,349574806 |
| Bacteria | Firmicutes                | Bacilli               | Bacillales         | Bacillaceae 2                    | Halolactibacillus        | 0           | 1,19968E-06 | 0,349574806 |
| Bacteria | Firmicutes                | Clostridia            | Clostridiales      | Clostridiales_Incertae Sedis XI  | Helcococcus              | 6,64828E-05 | 0,001677115 | 0,55568979  |
| Bacteria | Proteobacteria            | Epsilonproteobacteria | Campylobacteriales | Helicobacteraceae                | Helicobacter             | 5,92942E-06 | 0,000135159 | 0,068743836 |
| Bacteria | Firmicutes                | Clostridia            | Clostridiales      | Lachnospiraceae                  | Hespellia                | 0           | 6,96344E-06 | 0,015891197 |
| Bacteria | Firmicutes                | Erysipelotrichia      | Erysipelotrichales | Erysipelotrichaceae              | Holdemania               | 8,33623E-05 | 0,003027302 | 0,027750993 |
| Bacteria | Firmicutes                | Clostridia            | Clostridiales      | Lachnospiraceae                  | Howardella               | 0           | 3,19799E-05 | 0,015891197 |
| Bacteria | Firmicutes                | Clostridia            | Clostridiales      | Ruminococcaceae                  | Hydrogenoanaerobacterium | 0           | 3,66177E-05 | 0,002102622 |
| Bacteria | Proteobacteria            | Betaproteobacteria    | Burkholderiales    | Comamonadaceae                   | Hydrogenophaga           | 3,31524E-05 | 0           | 0,117601295 |
| Bacteria | Proteobacteria            | Betaproteobacteria    | Hydrogenophilales  | Hydrogenophilaceae               | Hydrogenophilus          | 0,000000991 | 0           | 0,117601295 |
| Bacteria | Bacteroidetes             | Sphingobacteriia      | Sphingobacteriales | Chitinophagaceae                 | Hydrotalea               | 6,80546E-07 | 0           | 0,285049407 |

|                 |                       |                            |                           |                            |                          |             |             |             |
|-----------------|-----------------------|----------------------------|---------------------------|----------------------------|--------------------------|-------------|-------------|-------------|
| <i>Bacteria</i> | <i>Proteobacteria</i> | <i>Alphaproteobacteria</i> | <i>Rhizobiales</i>        | <i>Hyphomicrobiaceae</i>   | <i>Hyphomicrobium</i>    | 6,03417E-06 | 1,02386E-05 | 0,214919521 |
| <i>Bacteria</i> | <i>Proteobacteria</i> | <i>Gammaproteobacteria</i> | <i>Xanthomonadales</i>    | <i>Xanthomonadaceae</i>    | <i>Ignatzschineria</i>   | 1,37092E-05 | 0           | 0,117601295 |
| <i>Bacteria</i> | <i>Actinobacteria</i> | <i>Actinobacteria</i>      | <i>Acidimicrobiales</i>   | <i>Acidimicrobiaceae</i>   | <i>Ilumatobacter</i>     | 0,000001791 | 2,33816E-05 | 0,619656703 |
| <i>Bacteria</i> | <i>Proteobacteria</i> | <i>Alphaproteobacteria</i> | <i>Rhodospirillales</i>   | <i>Rhodospirillaceae</i>   | <i>Insolitispirillum</i> | 3,31343E-05 | 5,87721E-07 | 0,045714365 |
| <i>Bacteria</i> | <i>Firmicutes</i>     | <i>Bacilli</i>             | <i>Lactobacillales</i>    | <i>Carnobacteriaceae</i>   | <i>Isobaculum</i>        | 0,000000995 | 2,81489E-06 | 0,234763663 |
| <i>Bacteria</i> | <i>Actinobacteria</i> | <i>Actinobacteria</i>      | <i>Actinomycetales</i>    | <i>Intrasporangiaceae</i>  | <i>Janibacter</i>        | 0,000007565 | 7,2242E-06  | 0,881930721 |
| <i>Bacteria</i> | <i>Proteobacteria</i> | <i>Betaproteobacteria</i>  | <i>Burkholderiales</i>    | <i>Oxalobacteraceae</i>    | <i>Janthinobacterium</i> | 1,39524E-05 | 0           | 0,047105791 |
| <i>Bacteria</i> | <i>Firmicutes</i>     | <i>Bacilli</i>             | <i>Bacillales</i>         | <i>Staphylococcaceae</i>   | <i>Jeotgalicoccus</i>    | 0,000100408 | 0,000196838 | 0,282058876 |
| <i>Bacteria</i> | <i>Firmicutes</i>     | <i>Clostridia</i>          | <i>Clostridiales</i>      | <i>Lachnospiraceae</i>     | <i>Johnsonella</i>       | 0,000000199 | 0           | 0,285049407 |
| <i>Bacteria</i> | <i>Actinobacteria</i> | <i>Actinobacteria</i>      | <i>Actinomycetales</i>    | <i>Jonesiaceae</i>         | <i>Jonesia</i>           | 2,82613E-06 | 0           | 0,285049407 |
| <i>Bacteria</i> | <i>Firmicutes</i>     | <i>Erysipelotrichia</i>    | <i>Erysipelotrichales</i> | <i>Erysipelotrichaceae</i> | <i>Kandleria</i>         | 0           | 5,88275E-06 | 0,17090352  |
| <i>Bacteria</i> | <i>Proteobacteria</i> | <i>Betaproteobacteria</i>  | <i>Burkholderiales</i>    | <i>Alcaligenaceae</i>      | <i>Kerstesia</i>         | 0,000000398 | 0           | 0,285049407 |
| <i>Bacteria</i> | <i>Actinobacteria</i> | <i>Actinobacteria</i>      | <i>Actinomycetales</i>    | <i>Kineosporiaceae</i>     | <i>Kineococcus</i>       | 0,000037929 | 0           | 0,285049407 |
| <i>Bacteria</i> | <i>Proteobacteria</i> | <i>Betaproteobacteria</i>  | <i>Neisseriales</i>       | <i>Neisseriaceae</i>       | <i>Kingella</i>          | 0,003130715 | 0,001977631 | 0,164914823 |
| <i>Bacteria</i> | <i>Proteobacteria</i> | <i>Gammaproteobacteria</i> | <i>Enterobacteriales</i>  | <i>Enterobacteriaceae</i>  | <i>Klebsiella</i>        | 0,001106914 | 0,000103761 | 0,037073147 |
| <i>Bacteria</i> | <i>Actinobacteria</i> | <i>Actinobacteria</i>      | <i>Actinomycetales</i>    | <i>Micrococcaceae</i>      | <i>Kocuria</i>           | 0,000112007 | 2,63599E-05 | 0,010197877 |
| <i>Bacteria</i> | <i>Firmicutes</i>     | <i>Bacilli</i>             | <i>Bacillales</i>         | <i>Planococcaceae</i>      | <i>Kurthia</i>           | 3,35537E-05 | 0,000230548 | 0,625585232 |
| <i>Bacteria</i> | <i>Actinobacteria</i> | <i>Actinobacteria</i>      | <i>Actinomycetales</i>    | <i>Dermaococcaceae</i>     | <i>Kytococcus</i>        | 2,18913E-05 | 0           | 0,017484674 |

|                 |                       |                            |                          |                           |                                       |             |             |             |
|-----------------|-----------------------|----------------------------|--------------------------|---------------------------|---------------------------------------|-------------|-------------|-------------|
| <i>Bacteria</i> | <i>Proteobacteria</i> | <i>Alphaproteobacteria</i> | <i>Rhizobiales</i>       | <i>Xanthobacteraceae</i>  | <i>Labrys</i>                         | 0           | 2,47309E-06 | 0,349574806 |
| <i>Bacteria</i> | <i>Firmicutes</i>     | <i>Clostridia</i>          | <i>Clostridiales</i>     | <i>Lachnospiraceae</i>    | <i>Lachnoanaerobaculum</i>            | 1,22178E-05 | 1,91984E-05 | 0,285992181 |
| <i>Bacteria</i> | <i>Firmicutes</i>     | <i>Clostridia</i>          | <i>Clostridiales</i>     | <i>Lachnospiraceae</i>    | <i>Lachnobacterium</i>                | 0           | 1,16675E-05 | 0,037588881 |
| <i>Bacteria</i> | <i>Firmicutes</i>     | <i>Clostridia</i>          | <i>Clostridiales</i>     | <i>Lachnospiraceae</i>    | <i>Lachnospira</i>                    | 0           | 6,03365E-05 | 0,015891197 |
| <i>Bacteria</i> | <i>Firmicutes</i>     | <i>Clostridia</i>          | <i>Clostridiales</i>     | <i>Lachnospiraceae</i>    | <i>Lachnospiraceae_incertae_sedis</i> | 0,000693852 | 0,012367029 | 0,132463567 |
| <i>Bacteria</i> | <i>Firmicutes</i>     | <i>Bacilli</i>             | <i>Lactobacillales</i>   | <i>Carnobacteriaceae</i>  | <i>Lacticigenium</i>                  | 7,06532E-07 | 0           | 0,285049407 |
| <i>Bacteria</i> | <i>Firmicutes</i>     | <i>Bacilli</i>             | <i>Lactobacillales</i>   | <i>Lactobacillaceae</i>   | <i>Lactobacillus</i>                  | 0,003277203 | 0,034557655 | 0,003813532 |
| <i>Bacteria</i> | <i>Firmicutes</i>     | <i>Bacilli</i>             | <i>Lactobacillales</i>   | <i>Streptococcaceae</i>   | <i>Lactococcus</i>                    | 4,39816E-06 | 0,0108555   | 0,002183045 |
| <i>Bacteria</i> | <i>Firmicutes</i>     | <i>Clostridia</i>          | <i>Clostridiales</i>     | <i>Lachnospiraceae</i>    | <i>Lactonifactor</i>                  | 7,06532E-07 | 4,60501E-05 | 0,012056639 |
| <i>Bacteria</i> | <i>Firmicutes</i>     | <i>Bacilli</i>             | <i>Lactobacillales</i>   | <i>Streptococcaceae</i>   | <i>Lactovum</i>                       | 4,37984E-05 | 2,40007E-05 | 0,417470854 |
| <i>Bacteria</i> | <i>Proteobacteria</i> | <i>Betaproteobacteria</i>  | <i>Burkholderiales</i>   | <i>Comamonadaceae</i>     | <i>Lampropedia</i>                    | 0           | 4,42176E-07 | 0,349574806 |
| <i>Bacteria</i> | <i>Bacteroidetes</i>  | <i>Cytophagia</i>          | <i>Cytophagales</i>      | <i>Cytophagaceae</i>      | <i>Leadbetterella</i>                 | 2,60697E-05 | 0           | 0,285049407 |
| <i>Bacteria</i> | <i>Proteobacteria</i> | <i>Gammaproteobacteria</i> | <i>Enterobacteriales</i> | <i>Enterobacteriaceae</i> | <i>Leclercia</i>                      | 4,38096E-07 | 4,42176E-07 | 1           |
| <i>Bacteria</i> | <i>Proteobacteria</i> | <i>Gammaproteobacteria</i> | <i>Enterobacteriales</i> | <i>Enterobacteriaceae</i> | <i>Leminorella</i>                    | 0,000000199 | 0           | 0,285049407 |
| <i>Bacteria</i> | <i>Fusobacteria</i>   | <i>Fusobacteriia</i>       | <i>Fusobacteriales</i>   | <i>Leptotrichiaceae</i>   | <i>Leptotrichia</i>                   | 0,000108726 | 3,42739E-05 | 0,393153438 |
| <i>Bacteria</i> | <i>Actinobacteria</i> | <i>Actinobacteria</i>      | <i>Actinomycetales</i>   | <i>Microbacteriaceae</i>  | <i>Leucobacter</i>                    | 3,35391E-05 | 9,29749E-06 | 0,113048724 |
| <i>Bacteria</i> | <i>Firmicutes</i>     | <i>Bacilli</i>             | <i>Lactobacillales</i>   | <i>Leuconostocaceae</i>   | <i>Leuconostoc</i>                    | 3,65688E-05 | 0,001122494 | 0,048332655 |
| <i>Bacteria</i> | <i>Proteobacteria</i> | <i>Betaproteobacteria</i>  | <i>Burkholderiales</i>   | <i>Comamonadaceae</i>     | <i>Limnohabitans</i>                  | 9,33337E-06 | 1,39701E-05 | 0,490840373 |

|                 |                        |                            |                           |                             |                        |             |             |             |
|-----------------|------------------------|----------------------------|---------------------------|-----------------------------|------------------------|-------------|-------------|-------------|
| <i>Bacteria</i> | <i>Proteobacteria</i>  | <i>Gammaproteobacteria</i> | <i>Pasteurellales</i>     | <i>Pasteurellaceae</i>      | <i>Lonepinella</i>     | 0           | 4,42176E-07 | 0,349574806 |
| <i>Bacteria</i> | <i>Proteobacteria</i>  | <i>Gammaproteobacteria</i> | <i>Xanthomonadales</i>    | <i>Xanthomonadaceae</i>     | <i>Luteimonas</i>      | 0           | 3,29911E-06 | 0,349574806 |
| <i>Bacteria</i> | <i>Actinobacteria</i>  | <i>Actinobacteria</i>      | <i>Actinomycetales</i>    | <i>Propionibacteriaceae</i> | <i>Luteococcus</i>     | 8,40996E-05 | 7,13403E-05 | 0,144376523 |
| <i>Bacteria</i> | <i>Verrucomicrobia</i> | <i>Verrucomicrobiae</i>    | <i>Verrucomicrobiales</i> | <i>Verrucomicrobiaceae</i>  | <i>Luteolibacter</i>   | 3,88131E-06 | 5,87721E-07 | 0,362848315 |
| <i>Bacteria</i> | <i>Firmicutes</i>      | <i>Clostridia</i>          | <i>Clostridiales</i>      | <i>Gracilibacteraceae</i>   | <i>Lutispora</i>       | 6,89619E-06 | 6,18123E-06 | 0,740726595 |
| <i>Bacteria</i> | <i>Firmicutes</i>      | <i>Bacilli</i>             | <i>Bacillales</i>         | <i>Planococcaceae</i>       | <i>Lysinibacillus</i>  | 0,000000995 | 0,00000743  | 0,298500252 |
| <i>Bacteria</i> | <i>Proteobacteria</i>  | <i>Gammaproteobacteria</i> | <i>Xanthomonadales</i>    | <i>Xanthomonadaceae</i>     | <i>Lysobacter</i>      | 2,38191E-06 | 0           | 0,285049407 |
| <i>Bacteria</i> | <i>Firmicutes</i>      | <i>Bacilli</i>             | <i>Bacillales</i>         | <i>Staphylococcaceae</i>    | <i>Macrococcus</i>     | 1,13045E-05 | 0           | 0,285049407 |
| <i>Bacteria</i> | <i>Bacteroidetes</i>   | <i>Bacteroidia</i>         | <i>Bacteroidales</i>      | <i>Marinilabiliaceae</i>    | <i>Mangroviflexus</i>  | 1,13045E-05 | 1,32653E-06 | 0,844911363 |
| <i>Bacteria</i> | <i>Proteobacteria</i>  | <i>Gammaproteobacteria</i> | <i>Pasteurellales</i>     | <i>Pasteurellaceae</i>      | <i>Mannheimia</i>      | 0,006325729 | 0,001890478 | 0,489953608 |
| <i>Bacteria</i> | <i>Proteobacteria</i>  | <i>Gammaproteobacteria</i> | <i>Oceanospirillales</i>  | <i>Oceanospirillaceae</i>   | <i>Marinospirillum</i> | 2,93846E-05 | 4,79871E-06 | 0,362848315 |
| <i>Bacteria</i> | <i>Actinobacteria</i>  | <i>Actinobacteria</i>      | <i>Actinomycetales</i>    | <i>Nocardioideaceae</i>     | <i>Marmoricola</i>     | 0,000003743 | 0           | 0,285049407 |
| <i>Bacteria</i> | <i>Proteobacteria</i>  | <i>Alphaproteobacteria</i> | <i>Rhizobiales</i>        | <i>Aurantimonadaceae</i>    | <i>Martelella</i>      | 0,000000398 | 0           | 0,285049407 |
| <i>Bacteria</i> | <i>Firmicutes</i>      | <i>Clostridia</i>          | <i>Clostridiales</i>      | <i>Lachnospiraceae</i>      | <i>Marvinbryantia</i>  | 1,88492E-05 | 3,84986E-06 | 0,233073458 |
| <i>Bacteria</i> | <i>Proteobacteria</i>  | <i>Betaproteobacteria</i>  | <i>Burkholderiales</i>    | <i>Oxalobacteraceae</i>     | <i>Massilia</i>        | 1,82364E-05 | 0           | 0,047105791 |
| <i>Bacteria</i> | <i>Firmicutes</i>      | <i>Negativicutes</i>       | <i>Selenomonadales</i>    | <i>Veillonellaceae</i>      | <i>Megasphaera</i>     | 0,000107022 | 0,021632281 | 0,007773957 |
| <i>Bacteria</i> | <i>Firmicutes</i>      | <i>Bacilli</i>             | <i>Lactobacillales</i>    | <i>Enterococcaceae</i>      | <i>Melissococcus</i>   | 0           | 2,91662E-07 | 0,349574806 |
| <i>Bacteria</i> | <i>Bacteroidetes</i>   | <i>Cytophagia</i>          | <i>Cytophagales</i>       | <i>Cytophagaceae</i>        | <i>Meniscus</i>        | 0           | 4,73698E-07 | 0,349574806 |



|                 |                       |                            |                           |                                          |                           |             |             |             |
|-----------------|-----------------------|----------------------------|---------------------------|------------------------------------------|---------------------------|-------------|-------------|-------------|
| <i>Bacteria</i> | <i>Proteobacteria</i> | <i>Alphaproteobacteria</i> | <i>Rhizobiales</i>        | <i>Phyllobacteriaceae</i>                | <i>Mesorhizobium</i>      | 1,15005E-05 | 3,25504E-05 | 0,949955982 |
| <i>Bacteria</i> | <i>Actinobacteria</i> | <i>Actinobacteria</i>      | <i>Bifidobacteriales</i>  | <i>Bifidobacteriaceae</i>                | <i>Metascardovia</i>      | 0           | 4,8573E-06  | 0,082355525 |
| <i>Archaea</i>  | <i>Euryarchaeota</i>  | <i>Methanobacteria</i>     | <i>Methanobacteriales</i> | <i>Methanobacteriaceae</i>               | <i>Methanobrevibacter</i> | 0,000174022 | 0,001034084 | 0,417886964 |
| <i>Archaea</i>  | <i>Euryarchaeota</i>  | <i>Methanobacteria</i>     | <i>Methanobacteriales</i> | <i>Methanobacteriaceae</i>               | <i>Methanosphaera</i>     | 2,60286E-06 | 4,94619E-07 | 0,844911363 |
| <i>Bacteria</i> | <i>Proteobacteria</i> | <i>Betaproteobacteria</i>  | <i>Methylophilales</i>    | <i>Methylophilaceae</i>                  | <i>Methylobacillus</i>    | 1,87551E-05 | 0           | 0,117601295 |
| <i>Bacteria</i> | <i>Proteobacteria</i> | <i>Alphaproteobacteria</i> | <i>Rhizobiales</i>        | <i>Methylobacteriaceae</i>               | <i>Methylobacterium</i>   | 2,35034E-05 | 4,42176E-07 | 0,013115904 |
| <i>Bacteria</i> | <i>Proteobacteria</i> | <i>Betaproteobacteria</i>  | <i>Methylophilales</i>    | <i>Methylophilaceae</i>                  | <i>Methylophilus</i>      | 1,27885E-05 | 0           | 0,117601295 |
| <i>Bacteria</i> | <i>Actinobacteria</i> | <i>Actinobacteria</i>      | <i>Actinomycetales</i>    | <i>Microbacteriaceae</i>                 | <i>Microbacterium</i>     | 0,000880889 | 8,23771E-06 | 0,000817973 |
| <i>Bacteria</i> | <i>Actinobacteria</i> | <i>Actinobacteria</i>      | <i>Actinomycetales</i>    | <i>Micrococcaceae</i>                    | <i>Micrococcus</i>        | 0,000180634 | 2,23779E-05 | 0,010197877 |
| <i>Bacteria</i> | <i>Actinobacteria</i> | <i>Actinobacteria</i>      | <i>Actinomycetales</i>    | <i>Propionibacteriaceae</i>              | <i>Microlunatus</i>       | 1,95214E-06 | 0           | 0,285049407 |
| <i>Bacteria</i> | <i>Actinobacteria</i> | <i>Actinobacteria</i>      | <i>Actinomycetales</i>    | <i>Nocardiaceae</i>                      | <i>Millisia</i>           | 0,000000199 | 3,29911E-06 | 1           |
| <i>Bacteria</i> | <i>Firmicutes</i>     | <i>Negativicutes</i>       | <i>Selenomonadales</i>    | <i>Veillonellaceae</i>                   | <i>Mitsuokella</i>        | 4,15509E-05 | 0,00197205  | 0,007773957 |
| <i>Bacteria</i> | <i>Firmicutes</i>     | <i>Clostridia</i>          | <i>Clostridiales</i>      | <i>Clostridiales_Incertae_Sedis XIII</i> | <i>Mogibacterium</i>      | 2,49425E-05 | 2,14525E-05 | 0,203017106 |
| <i>Bacteria</i> | <i>Bacteroidetes</i>  | <i>Flavobacteriia</i>      | <i>Flavobacteriales</i>   | <i>Flavobacteriaceae</i>                 | <i>Moheibacter</i>        | 2,77578E-05 | 2,98345E-06 | 0,270306711 |
| <i>Bacteria</i> | <i>Proteobacteria</i> | <i>Gammaproteobacteria</i> | <i>Pseudomonadales</i>    | <i>Moraxellaceae</i>                     | <i>Moraxella</i>          | 0,342219279 | 0,091731595 | 0,015087256 |
| <i>Bacteria</i> | <i>Proteobacteria</i> | <i>Gammaproteobacteria</i> | <i>Enterobacteriales</i>  | <i>Enterobacteriaceae</i>                | <i>Morganella</i>         | 8,13932E-05 | 0           | 0,285049407 |
| <i>Bacteria</i> | <i>Firmicutes</i>     | <i>Clostridia</i>          | <i>Clostridiales</i>      | <i>Lachnospiraceae</i>                   | <i>Moryella</i>           | 1,67557E-06 | 0           | 0,117601295 |
| <i>Bacteria</i> | <i>Actinobacteria</i> | <i>Actinobacteria</i>      | <i>Actinomycetales</i>    | <i>Motilibacter</i>                      | <i>Motilibacter</i>       | 0,000004555 | 0           | 0,285049407 |

|                 |                        |                            |                          |                           |                        |             |             |             |
|-----------------|------------------------|----------------------------|--------------------------|---------------------------|------------------------|-------------|-------------|-------------|
| <i>Bacteria</i> | <i>Deferribacteres</i> | <i>Deferribacteres</i>     | <i>Deferribacterales</i> | <i>Deferribacteraceae</i> | <i>Mucispirillum</i>   | 2,28417E-05 | 0,001106287 | 0,209482376 |
| <i>Bacteria</i> | <i>Firmicutes</i>      | <i>Clostridia</i>          | <i>Clostridiales</i>     | <i>Incertae Sedis XI</i>  | <i>Murdochiella</i>    | 1,64151E-05 | 8,76506E-05 | 0,850652329 |
| <i>Bacteria</i> | <i>Actinobacteria</i>  | <i>Actinobacteria</i>      | <i>Actinomycetales</i>   | <i>Mycobacteriaceae</i>   | <i>Mycobacterium</i>   | 1,89645E-05 | 0           | 0,285049407 |
| <i>Bacteria</i> | <i>Tenericutes</i>     | <i>Mollicutes</i>          | <i>Mycoplasmatales</i>   | <i>Mycoplasmataceae</i>   | <i>Mycoplasma</i>      | 0,030510822 | 0,005765404 | 0,010896354 |
| <i>Bacteria</i> | <i>Bacteroidetes</i>   | <i>Flavobacteriia</i>      | <i>Flavobacteriales</i>  | <i>Flavobacteriaceae</i>  | <i>Myroides</i>        | 0,003350288 | 2,56877E-05 | 0,006716646 |
| <i>Bacteria</i> | <i>Firmicutes</i>      | <i>Clostridia</i>          | <i>Clostridiales</i>     | <i>Natranaerovirga</i>    | <i>Natranaerovirga</i> | 0           | 8,84352E-07 | 0,349574806 |
| <i>Bacteria</i> | <i>Proteobacteria</i>  | <i>Betaproteobacteria</i>  | <i>Burkholderiales</i>   | <i>Oxalobacteraceae</i>   | <i>Naxibacter</i>      | 4,14041E-06 | 2,33937E-05 | 0,562548843 |
| <i>Bacteria</i> | <i>Firmicutes</i>      | <i>Negativicutes</i>       | <i>Selenomonadales</i>   | <i>Veillonellaceae</i>    | <i>Negativicoccus</i>  | 0           | 4,94619E-07 | 0,349574806 |
| <i>Bacteria</i> | <i>Proteobacteria</i>  | <i>Betaproteobacteria</i>  | <i>Neisseriales</i>      | <i>Neisseriaceae</i>      | <i>Neisseria</i>       | 0,049348792 | 0,04257156  | 0,35453948  |
| <i>Bacteria</i> | <i>Actinobacteria</i>  | <i>Actinobacteria</i>      | <i>Actinomycetales</i>   | <i>Micrococcaceae</i>     | <i>Nesterenkonia</i>   | 6,53571E-05 | 2,99919E-07 | 0,000988911 |
| <i>Bacteria</i> | <i>Proteobacteria</i>  | <i>Gammaproteobacteria</i> | <i>Pasteurellales</i>    | <i>Pasteurellaceae</i>    | <i>Nicoletella</i>     | 2,58607E-06 | 0           | 0,285049407 |
| <i>Bacteria</i> | <i>Proteobacteria</i>  | <i>Gammaproteobacteria</i> | <i>Oceanospirillales</i> | <i>Oceanospirillaceae</i> | <i>Nitrincola</i>      | 0,000001194 | 0           | 0,285049407 |
| <i>Bacteria</i> | <i>Proteobacteria</i>  | <i>Alphaproteobacteria</i> | <i>Rhizobiales</i>       | <i>Bradyrhizobiaceae</i>  | <i>Nitrobacter</i>     | 1,05433E-05 | 0           | 0,117601295 |
| <i>Bacteria</i> | <i>Actinobacteria</i>  | <i>Actinobacteria</i>      | <i>Actinomycetales</i>   | <i>Nocardioidaceae</i>    | <i>Nocardioides</i>    | 1,65612E-05 | 1,52574E-06 | 0,65591049  |
| <i>Bacteria</i> | <i>Firmicutes</i>      | <i>Bacilli</i>             | <i>Bacillales</i>        | <i>Staphylococcaceae</i>  | <i>Nosocomiicoccus</i> | 4,34529E-06 | 6,04831E-05 | 0,272253581 |
| <i>Bacteria</i> | <i>Proteobacteria</i>  | <i>Alphaproteobacteria</i> | <i>Sphingomonadales</i>  | <i>Sphingomonadaceae</i>  | <i>Novosphingobium</i> | 5,54849E-05 | 0           | 0,017484674 |
| <i>Bacteria</i> | <i>Proteobacteria</i>  | <i>Gammaproteobacteria</i> | <i>Aeromonadales</i>     | <i>Aeromonadaceae</i>     | <i>Oceanimonas</i>     | 1,25373E-05 | 1,4996E-06  | 0,844911363 |
| <i>Bacteria</i> | <i>Proteobacteria</i>  | <i>Alphaproteobacteria</i> | <i>Rhizobiales</i>       | <i>Brucellaceae</i>       | <i>Ochrobactrum</i>    | 0,000889613 | 0,000028509 | 0,001076633 |

|                 |                       |                                       |                           |                           |                           |             |             |             |
|-----------------|-----------------------|---------------------------------------|---------------------------|---------------------------|---------------------------|-------------|-------------|-------------|
| <i>Bacteria</i> | <i>Bacteroidetes</i>  | <i>Bacteroidia</i>                    | <i>Bacteroidales</i>      | <i>Porphyromonadaceae</i> | <i>Odoribacter</i>        | 6,56252E-06 | 7,25376E-05 | 0,490840373 |
| <i>Bacteria</i> | <i>Bacteroidetes</i>  | <i>Bacteroidetes"_incertae_se dis</i> | <i>Ohtaekwangia</i>       | <i>Ohtaekwangia</i>       | <i>Ohtaekwangia</i>       | 0           | 2,31475E-06 | 0,349574806 |
| <i>Bacteria</i> | <i>Actinobacteria</i> | <i>Actinobacteria</i>                 | <i>Actinomycetales</i>    | <i>Microbacteriaceae</i>  | <i>Okibacterium</i>       | 8,79551E-07 | 0           | 0,117601295 |
| <i>Bacteria</i> | <i>Proteobacteria</i> | <i>Betaproteobacteria</i>             | <i>Burkholderiales</i>    | <i>Alcaligenaceae</i>     | <i>Oligella</i>           | 0,000000796 | 0           | 0,285049407 |
| <i>Bacteria</i> | <i>Proteobacteria</i> | <i>Alphaproteobacteria</i>            | <i>Rhizobiales</i>        | <i>Bradyrhizobiaceae</i>  | <i>Oligotropha</i>        | 0           | 8,915E-07   | 0,17090352  |
| <i>Bacteria</i> | <i>Actinobacteria</i> | <i>Actinobacteria</i>                 | <i>Coriobacteriales</i>   | <i>Coriobacteriaceae</i>  | <i>Olsenella</i>          | 1,01113E-05 | 0,00010059  | 0,169282508 |
| <i>Bacteria</i> | <i>Firmicutes</i>     | <i>Clostridia</i>                     | <i>Clostridiales</i>      | <i>Lachnospiraceae</i>    | <i>Oribacterium</i>       | 0,000139212 | 0,000953139 | 0,04893855  |
| <i>Bacteria</i> | <i>Actinobacteria</i> | <i>Actinobacteria</i>                 | <i>Actinomycetales</i>    | <i>Intrasporangiaceae</i> | <i>Ornithinimicrobium</i> | 0           | 2,98345E-06 | 0,17090352  |
| <i>Bacteria</i> | <i>Bacteroidetes</i>  | <i>Flavobacteriia</i>                 | <i>Flavobacteriales</i>   | <i>Flavobacteriaceae</i>  | <i>Ornithobacterium</i>   | 2,14444E-05 | 0,000055934 | 0,063939089 |
| <i>Bacteria</i> | <i>Firmicutes</i>     | <i>Clostridia</i>                     | <i>Clostridiales</i>      | <i>Ruminococcaceae</i>    | <i>Oscillibacter</i>      | 0,001180058 | 0,01423382  | 0,164914823 |
| <i>Bacteria</i> | <i>Proteobacteria</i> | <i>Gammaproteobacteria</i>            | <i>Pasteurellales</i>     | <i>Pasteurellaceae</i>    | <i>Otariodibacter</i>     | 6,48808E-05 | 4,67181E-05 | 0,643428844 |
| <i>Bacteria</i> | <i>Bacteroidetes</i>  | <i>Sphingobacteriia</i>               | <i>Sphingobacteriales</i> | <i>Chitinophagaceae</i>   | <i>Other</i>              | 0,026914734 | 0,008368843 | 0,048332655 |
| <i>Bacteria</i> | <i>Other</i>          | <i>Other</i>                          | <i>Other</i>              | <i>Other</i>              | <i>Other</i>              | 0,010044255 | 0,003342864 | 0,132463567 |
| <i>Bacteria</i> | <i>Firmicutes</i>     | <i>Clostridia</i>                     | <i>Clostridiales</i>      | <i>Ruminococcaceae</i>    | <i>Other</i>              | 0,002837881 | 0,024979279 | 0,082579274 |
| <i>Bacteria</i> | <i>Firmicutes</i>     | <i>Clostridia</i>                     | <i>Clostridiales</i>      | <i>Other</i>              | <i>Other</i>              | 0,001954701 | 0,018041689 | 0,132463567 |
| <i>Bacteria</i> | <i>Firmicutes</i>     | <i>Clostridia</i>                     | <i>Clostridiales</i>      | <i>Lachnospiraceae</i>    | <i>Other</i>              | 0,001358907 | 0,009779488 | 0,105192505 |
| <i>Bacteria</i> | <i>Firmicutes</i>     | <i>Negativicutes</i>                  | <i>Selenomonadales</i>    | <i>Veillonellaceae</i>    | <i>Other</i>              | 0,000138323 | 0,008259076 | 0,010825507 |
| <i>Bacteria</i> | <i>Bacteroidetes</i>  | <i>Bacteroidia</i>                    | <i>Bacteroidales</i>      | <i>Porphyromonadaceae</i> | <i>Other</i>              | 0,000176862 | 0,006048777 | 0,064077507 |

|                 |                       |                            |                           |                                              |              |             |                 |                 |
|-----------------|-----------------------|----------------------------|---------------------------|----------------------------------------------|--------------|-------------|-----------------|-----------------|
| <i>Bacteria</i> | <i>Bacteroidetes</i>  | <i>Other</i>               | <i>Other</i>              | <i>Other</i>                                 | <i>Other</i> | 0,000426828 | 0,0055155<br>93 | 0,02789<br>0529 |
| <i>Bacteria</i> | <i>Bacteroidetes</i>  | <i>Flavobacteriia</i>      | <i>Flavobacteriales</i>   | <i>Flavobacteriaceae</i>                     | <i>Other</i> | 0,000443254 | 0,0051071<br>63 | 0,10519<br>2505 |
| <i>Bacteria</i> | <i>Bacteroidetes</i>  | <i>Bacteroidia</i>         | <i>Bacteroidales</i>      | <i>Other</i>                                 | <i>Other</i> | 0,000445299 | 0,0050620<br>05 | 0,02789<br>0529 |
| <i>Bacteria</i> | <i>Bacteroidetes</i>  | <i>Bacteroidia</i>         | <i>Bacteroidales</i>      | <i>Prevotellaceae</i>                        | <i>Other</i> | 3,52357E-05 | 0,0040746<br>1  | 0,04265<br>8104 |
| <i>Bacteria</i> | <i>Proteobacteria</i> | <i>Gammaproteobacteria</i> | <i>Pasteurellales</i>     | <i>Pasteurellaceae</i>                       | <i>Other</i> | 0,004814278 | 0,0039563<br>73 | 0,20301<br>7106 |
| <i>Bacteria</i> | <i>Firmicutes</i>     | <i>Other</i>               | <i>Other</i>              | <i>Other</i>                                 | <i>Other</i> | 0,000230167 | 0,0034463<br>2  | 0,20301<br>7106 |
| <i>Bacteria</i> | <i>Firmicutes</i>     | <i>Bacilli</i>             | <i>Lactobacillales</i>    | <i>Enterococcaceae</i>                       | <i>Other</i> | 0,003645571 | 0,0025444<br>4  | 0,56143<br>2374 |
| <i>Bacteria</i> | <i>Firmicutes</i>     | <i>Bacilli</i>             | <i>Lactobacillales</i>    | <i>Aerococcaceae</i>                         | <i>Other</i> | 0,000220519 | 0,0025368<br>73 | 1               |
| <i>Bacteria</i> | <i>Proteobacteria</i> | <i>Deltaproteobacteria</i> | <i>Other</i>              | <i>Other</i>                                 | <i>Other</i> | 3,56846E-05 | 0,0012138<br>76 | 0,01419<br>5744 |
| <i>Bacteria</i> | <i>Planctomycetes</i> | <i>Planctomycetia</i>      | <i>Planctomycetales</i>   | <i>Planctomycetaceae</i>                     | <i>Other</i> | 7,97945E-05 | 0,0011580<br>77 | 0,06312<br>8008 |
| <i>Bacteria</i> | <i>Firmicutes</i>     | <i>Erysipelotrichia</i>    | <i>Erysipelotrichales</i> | <i>Erysipelotrichaceae</i>                   | <i>Other</i> | 6,22529E-05 | 0,0008104<br>52 | 0,02063<br>7558 |
| <i>Bacteria</i> | <i>Bacteroidetes</i>  | <i>Sphingobacteriia</i>    | <i>Sphingobacteriales</i> | <i>Sphingobacteriaceae</i>                   | <i>Other</i> | 0,000118235 | 0,0005491<br>54 | 0,64223<br>7837 |
| <i>Bacteria</i> | <i>Firmicutes</i>     | <i>Bacilli</i>             | <i>Lactobacillales</i>    | <i>Other</i>                                 | <i>Other</i> | 3,30442E-05 | 0,0005081<br>94 | 0,00262<br>1822 |
| <i>Bacteria</i> | <i>Proteobacteria</i> | <i>Betaproteobacteria</i>  | <i>Neisseriales</i>       | <i>Neisseriaceae</i>                         | <i>Other</i> | 0,001085817 | 0,0004588<br>41 | 0,10519<br>2505 |
| <i>Bacteria</i> | <i>Firmicutes</i>     | <i>Clostridia</i>          | <i>Clostridiales</i>      | <i>Clostridiales_Incertae<br/>Sedis XIII</i> | <i>Other</i> | 1,52786E-05 | 0,0004122<br>18 | 0,02018<br>6618 |
| <i>Bacteria</i> | <i>Proteobacteria</i> | <i>Deltaproteobacteria</i> | <i>Desulfovibrionales</i> | <i>Desulfovibrionaceae</i>                   | <i>Other</i> | 5,87389E-05 | 0,0002937<br>13 | 0,09041<br>0706 |
| <i>Bacteria</i> | <i>Firmicutes</i>     | <i>Bacilli</i>             | <i>Lactobacillales</i>    | <i>Carnobacteriaceae</i>                     | <i>Other</i> | 3,65281E-05 | 0,0002906<br>65 | 0,03656<br>6184 |
| <i>Bacteria</i> | <i>Proteobacteria</i> | <i>Gammaproteobacteria</i> | <i>Enterobacteriales</i>  | <i>Enterobacteriaceae</i>                    | <i>Other</i> | 0,000034318 | 0,0002881<br>75 | 0,20261<br>3531 |

|                     |                       |                              |                           |                                        |              |             |             |             |
|---------------------|-----------------------|------------------------------|---------------------------|----------------------------------------|--------------|-------------|-------------|-------------|
| <i>Unclassified</i> | <i>Other</i>          | <i>Other</i>                 | <i>Other</i>              | <i>Other</i>                           | <i>Other</i> | 0,0055402   | 0,000285374 | 0,001780211 |
| <i>Bacteria</i>     | <i>Actinobacteria</i> | <i>Actinobacteria</i>        | <i>Coriobacteriales</i>   | <i>Coriobacteriaceae</i>               | <i>Other</i> | 6,49454E-05 | 0,000240768 | 0,072593149 |
| <i>Bacteria</i>     | <i>Firmicutes</i>     | <i>Clostridia</i>            | <i>Clostridiales</i>      | <i>Clostridiales_Incertae Sedis XI</i> | <i>Other</i> | 6,58162E-05 | 0,000235456 | 0,346484118 |
| <i>Bacteria</i>     | <i>Proteobacteria</i> | <i>Alphaproteobacteria</i>   | <i>Other</i>              | <i>Other</i>                           | <i>Other</i> | 6,40578E-06 | 0,000207409 | 0,001886168 |
| <i>Bacteria</i>     | <i>Firmicutes</i>     | <i>Clostridia</i>            | <i>Clostridiales</i>      | <i>Clostridiaceae 1</i>                | <i>Other</i> | 6,66141E-05 | 0,000194602 | 0,064077507 |
| <i>Bacteria</i>     | <i>Proteobacteria</i> | <i>Betaproteobacteria</i>    | <i>Burkholderiales</i>    | <i>Other</i>                           | <i>Other</i> | 0,000034557 | 0,000178001 | 0,201399822 |
| <i>Bacteria</i>     | <i>Firmicutes</i>     | <i>Negativicutes</i>         | <i>Selenomonadales</i>    | <i>Acidaminococcaceae</i>              | <i>Other</i> | 0           | 0,000168738 | 0,006111784 |
| <i>Bacteria</i>     | <i>Actinobacteria</i> | <i>Actinobacteria</i>        | <i>Actinomycetales</i>    | <i>Other</i>                           | <i>Other</i> | 0,000355748 | 0,000157894 | 0,082305182 |
| <i>Bacteria</i>     | <i>Proteobacteria</i> | <i>Gammaproteobacteria</i>   | <i>Pseudomonadales</i>    | <i>Moraxellaceae</i>                   | <i>Other</i> | 0,000332247 | 0,000138773 | 0,104881801 |
| <i>Bacteria</i>     | <i>Proteobacteria</i> | <i>Betaproteobacteria</i>    | <i>Other</i>              | <i>Other</i>                           | <i>Other</i> | 0,000102763 | 0,000130469 | 0,35453948  |
| <i>Bacteria</i>     | <i>Firmicutes</i>     | <i>Negativicutes</i>         | <i>Selenomonadales</i>    | <i>Other</i>                           | <i>Other</i> | 0,000001724 | 0,000121686 | 0,036713856 |
| <i>Bacteria</i>     | <i>Spirochaetes</i>   | <i>Spirochaetia</i>          | <i>Spirochaetales</i>     | <i>Spirochaetaceae</i>                 | <i>Other</i> | 0           | 0,000119004 | 0,015891197 |
| <i>Bacteria</i>     | <i>Proteobacteria</i> | <i>Gammaproteobacteria</i>   | <i>Other</i>              | <i>Other</i>                           | <i>Other</i> | 0,000359929 | 0,000106706 | 0,005478553 |
| <i>Bacteria</i>     | <i>Firmicutes</i>     | <i>Clostridia</i>            | <i>Clostridiales</i>      | <i>Incertae Sedis XI</i>               | <i>Other</i> | 0           | 9,27013E-05 | 0,082355525 |
| <i>Bacteria</i>     | <i>Proteobacteria</i> | <i>Other</i>                 | <i>Other</i>              | <i>Other</i>                           | <i>Other</i> | 0,000400693 | 8,42972E-05 | 0,015087256 |
| <i>Bacteria</i>     | <i>Firmicutes</i>     | <i>Bacilli</i>               | <i>Other</i>              | <i>Other</i>                           | <i>Other</i> | 1,31488E-05 | 7,28777E-05 | 0,131079232 |
| <i>Bacteria</i>     | <i>Firmicutes</i>     | <i>Bacilli</i>               | <i>Lactobacillales</i>    | <i>Lactobacillaceae</i>                | <i>Other</i> | 2,38119E-06 | 7,07067E-05 | 0,000967429 |
| <i>Bacteria</i>     | <i>Proteobacteria</i> | <i>Epsilonproteobacteria</i> | <i>Campylobacteriales</i> | <i>Other</i>                           | <i>Other</i> | 0           | 5,18825E-05 | 0,006111784 |

|                 |                        |                              |                           |                           |              |             |             |             |
|-----------------|------------------------|------------------------------|---------------------------|---------------------------|--------------|-------------|-------------|-------------|
| <i>Bacteria</i> | <i>Firmicutes</i>      | <i>Clostridia</i>            | <i>Other</i>              | <i>Other</i>              | <i>Other</i> | 7,78551E-06 | 5,13085E-05 | 0,019769406 |
| <i>Bacteria</i> | <i>Proteobacteria</i>  | <i>Deltaproteobacteria</i>   | <i>Desulfovibrionales</i> | <i>Other</i>              | <i>Other</i> | 0           | 0,00002425  | 0,006111784 |
| <i>Bacteria</i> | <i>Bacteroidetes</i>   | <i>Bacteroidia</i>           | <i>Bacteroidales</i>      | <i>Marinilabiaceae</i>    | <i>Other</i> | 0           | 0,000023066 | 0,002102622 |
| <i>Bacteria</i> | <i>Synergistetes</i>   | <i>Synergistia</i>           | <i>Synergistales</i>      | <i>Synergistaceae</i>     | <i>Other</i> | 3,04167E-05 | 2,27804E-05 | 0,625585232 |
| <i>Bacteria</i> | <i>Firmicutes</i>      | <i>Bacilli</i>               | <i>Lactobacillales</i>    | <i>Streptococcaceae</i>   | <i>Other</i> | 3,9297E-06  | 2,04634E-05 | 0,625585232 |
| <i>Bacteria</i> | <i>Fusobacteria</i>    | <i>Fusobacteriia</i>         | <i>Fusobacteriales</i>    | <i>Leptotrichiaceae</i>   | <i>Other</i> | 4,08328E-06 | 2,01207E-05 | 0,619656703 |
| <i>Bacteria</i> | <i>Proteobacteria</i>  | <i>Alphaproteobacteria</i>   | <i>Rhodospirillales</i>   | <i>Rhodospirillaceae</i>  | <i>Other</i> | 0,000005749 | 0,000019618 | 0,148871993 |
| <i>Bacteria</i> | <i>Proteobacteria</i>  | <i>Betaproteobacteria</i>    | <i>Burkholderiales</i>    | <i>Sutterellaceae</i>     | <i>Other</i> | 0           | 1,63834E-05 | 0,037588881 |
| <i>Bacteria</i> | <i>Spirochaetes</i>    | <i>Spirochaetia</i>          | <i>Spirochaetales</i>     | <i>Other</i>              | <i>Other</i> | 0           | 1,16735E-05 | 0,037588881 |
| <i>Bacteria</i> | <i>Actinobacteria</i>  | <i>Actinobacteria</i>        | <i>Actinomycetales</i>    | <i>Micrococcaceae</i>     | <i>Other</i> | 1,82226E-05 | 1,08583E-05 | 1           |
| <i>Bacteria</i> | <i>Proteobacteria</i>  | <i>Betaproteobacteria</i>    | <i>Burkholderiales</i>    | <i>Alcaligenaceae</i>     | <i>Other</i> | 9,35325E-06 | 9,65522E-06 | 0,372857936 |
| <i>Bacteria</i> | <i>Proteobacteria</i>  | <i>Alphaproteobacteria</i>   | <i>Sphingomonadales</i>   | <i>Other</i>              | <i>Other</i> | 0,000000199 | 9,29749E-06 | 1           |
| <i>Bacteria</i> | <i>Actinobacteria</i>  | <i>Actinobacteria</i>        | <i>Actinomycetales</i>    | <i>Corynebacteriaceae</i> | <i>Other</i> | 4,38096E-07 | 9,06842E-06 | 0,050186187 |
| <i>Bacteria</i> | <i>Proteobacteria</i>  | <i>Gammaproteobacteria</i>   | <i>Pseudomonadales</i>    | <i>Other</i>              | <i>Other</i> | 2,99795E-05 | 9,00509E-06 | 0,048595087 |
| <i>Bacteria</i> | <i>Proteobacteria</i>  | <i>Epsilonproteobacteria</i> | <i>Other</i>              | <i>Other</i>              | <i>Other</i> | 0           | 8,17793E-06 | 0,037588881 |
| <i>Bacteria</i> | <i>Verrucomicrobia</i> | <i>Opitutae</i>              | <i>Puniceicoccales</i>    | <i>Puniceicoccaceae</i>   | <i>Other</i> | 0           | 6,58282E-06 | 0,17090352  |
| <i>Bacteria</i> | <i>Actinobacteria</i>  | <i>Actinobacteria</i>        | <i>Other</i>              | <i>Other</i>              | <i>Other</i> | 0           | 6,2983E-06  | 0,349574806 |
| <i>Bacteria</i> | <i>Fusobacteria</i>    | <i>Fusobacteriia</i>         | <i>Fusobacteriales</i>    | <i>Fusobacteriaceae</i>   | <i>Other</i> | 2,95552E-06 | 5,68375E-06 | 0,896124778 |

|                 |                                  |                            |                           |                                       |              |             |             |             |
|-----------------|----------------------------------|----------------------------|---------------------------|---------------------------------------|--------------|-------------|-------------|-------------|
| <i>Bacteria</i> | <i>Proteobacteria</i>            | <i>Betaproteobacteria</i>  | <i>Burkholderiales</i>    | <i>Comamonadaceae</i>                 | <i>Other</i> | 4,68385E-05 | 5,54533E-06 | 0,238592829 |
| <i>Bacteria</i> | <i>Actinobacteria</i>            | <i>Actinobacteria</i>      | <i>Actinomycetales</i>    | <i>Propionibacteriaceae</i>           | <i>Other</i> | 0,000010175 | 5,39854E-06 | 0,456570763 |
| <i>Bacteria</i> | <i>Firmicutes</i>                | <i>Bacilli</i>             | <i>Bacillales</i>         | <i>Other</i>                          | <i>Other</i> | 5,67973E-05 | 5,16472E-06 | 0,07886029  |
| <i>Bacteria</i> | <i>Bacteroidetes</i>             | <i>Sphingobacteriia</i>    | <i>Sphingobacteriales</i> | <i>Other</i>                          | <i>Other</i> | 6,80546E-07 | 0,000004425 | 0,372857936 |
| <i>Bacteria</i> | <i>Proteobacteria</i>            | <i>Alphaproteobacteria</i> | <i>Rhizobiales</i>        | <i>Bradyrhizobiaceae</i>              | <i>Other</i> | 0,000000219 | 3,46156E-06 | 0,234763663 |
| <i>Bacteria</i> | <i>Proteobacteria</i>            | <i>Gammaproteobacteria</i> | <i>Aeromonadales</i>      | <i>Succinivibrionaceae</i>            | <i>Other</i> | 0           | 3,18907E-06 | 0,082355525 |
| <i>Bacteria</i> | <i>Lentisphaerae</i>             | <i>Other</i>               | <i>Other</i>              | <i>Other</i>                          | <i>Other</i> | 0           | 3,09523E-06 | 0,349574806 |
| <i>Bacteria</i> | <i>Cyanobacteria/Chloroplast</i> | <i>Chloroplast</i>         | <i>Chloroplast</i>        | <i>Chloroplast</i>                    | <i>Other</i> | 0,000000219 | 2,95893E-06 | 1           |
| <i>Bacteria</i> | <i>Tenericutes</i>               | <i>Mollicutes</i>          | <i>Other</i>              | <i>Other</i>                          | <i>Other</i> | 0           | 2,9386E-06  | 0,349574806 |
| <i>Bacteria</i> | <i>Firmicutes</i>                | <i>Clostridia</i>          | <i>Clostridiales</i>      | <i>Peptostreptococcaceae</i>          | <i>Other</i> | 5,40363E-06 | 2,67175E-06 | 0,329113986 |
| <i>Bacteria</i> | <i>Proteobacteria</i>            | <i>Betaproteobacteria</i>  | <i>Burkholderiales</i>    | <i>Burkholderiales_incertae_sedis</i> | <i>Other</i> | 6,56561E-06 | 2,65305E-06 | 0,456570763 |
| <i>Bacteria</i> | <i>Bacteroidetes</i>             | <i>Cytophagia</i>          | <i>Cytophagales</i>       | <i>Other</i>                          | <i>Other</i> | 0           | 2,64751E-06 | 0,17090352  |
| <i>Bacteria</i> | <i>Proteobacteria</i>            | <i>Alphaproteobacteria</i> | <i>Sphingomonadales</i>   | <i>Sphingomonadaceae</i>              | <i>Other</i> | 0           | 0,000002625 | 0,349574806 |
| <i>Bacteria</i> | <i>Actinobacteria</i>            | <i>Actinobacteria</i>      | <i>Actinomycetales</i>    | <i>Dermacoccaceae</i>                 | <i>Other</i> | 0,000001724 | 2,28861E-06 | 0,740726595 |
| <i>Bacteria</i> | <i>Actinobacteria</i>            | <i>Actinobacteria</i>      | <i>Actinomycetales</i>    | <i>Microbacteriaceae</i>              | <i>Other</i> | 1,43262E-05 | 2,0752E-06  | 0,020462223 |
| <i>Bacteria</i> | <i>Firmicutes</i>                | <i>Clostridia</i>          | <i>Clostridiales</i>      | <i>Eubacteriaceae</i>                 | <i>Other</i> | 0           | 1,94714E-06 | 0,082355525 |
| <i>Bacteria</i> | <i>Actinobacteria</i>            | <i>Actinobacteria</i>      | <i>Actinomycetales</i>    | <i>Intrasporangiaceae</i>             | <i>Other</i> | 0           | 1,79951E-06 | 0,349574806 |
| <i>Bacteria</i> | <i>Verrucomicrobia</i>           | <i>Verrucomicrobiae</i>    | <i>Verrucomicrobiales</i> | <i>Verrucomicrobiaceae</i>            | <i>Other</i> | 1,41306E-06 | 1,76963E-06 | 0,457717434 |

|                 |                        |                            |                           |                           |              |             |                 |                 |
|-----------------|------------------------|----------------------------|---------------------------|---------------------------|--------------|-------------|-----------------|-----------------|
| <i>Bacteria</i> | <i>Proteobacteria</i>  | <i>Deltaproteobacteria</i> | <i>Desulfovibrionales</i> | <i>Desulfhalobiaceae</i>  | <i>Other</i> | 0           | 1,7687E-06      | 0,34957<br>4806 |
| <i>Bacteria</i> | <i>Actinobacteria</i>  | <i>Actinobacteria</i>      | <i>Actinomycetales</i>    | <i>Dermabacteraceae</i>   | <i>Other</i> | 0,00000126  | 1,66263E-06     | 1               |
| <i>Bacteria</i> | <i>Actinobacteria</i>  | <i>Actinobacteria</i>      | <i>Actinomycetales</i>    | <i>Dermatophilaceae</i>   | <i>Other</i> | 1,13045E-05 | 1,4996E-06      | 0,84491<br>1363 |
| <i>Bacteria</i> | <i>Proteobacteria</i>  | <i>Betaproteobacteria</i>  | <i>Rhodocyclales</i>      | <i>Rhodocyclaceae</i>     | <i>Other</i> | 0           | 1,4996E-06      | 0,34957<br>4806 |
| <i>Archaea</i>  | <i>Other</i>           | <i>Other</i>               | <i>Other</i>              | <i>Other</i>              | <i>Other</i> | 2,87398E-05 | 1,48748E-06     | 0,00502<br>0543 |
| <i>Bacteria</i> | <i>Proteobacteria</i>  | <i>Alphaproteobacteria</i> | <i>Rhizobiales</i>        | <i>Hyphomicrobiaceae</i>  | <i>Other</i> | 0,000050848 | 1,47947E-06     | 0,00473<br>8512 |
| <i>Bacteria</i> | <i>Proteobacteria</i>  | <i>Alphaproteobacteria</i> | <i>Rhodobacterales</i>    | <i>Rhodobacteraceae</i>   | <i>Other</i> | 0,000026016 | 1,39438E-06     | 0,27030<br>6711 |
| <i>Bacteria</i> | <i>Proteobacteria</i>  | <i>Gammaproteobacteria</i> | <i>Aeromonadales</i>      | <i>Aeromonadaceae</i>     | <i>Other</i> | 5,57215E-06 | 1,36807E-06     | 0,74072<br>6595 |
| <i>Bacteria</i> | <i>Firmicutes</i>      | <i>Bacilli</i>             | <i>Bacillales</i>         | <i>Staphylococcaceae</i>  | <i>Other</i> | 7,19091E-05 | 1,35059E-06     | 0,18750<br>2587 |
| <i>Bacteria</i> | <i>Actinobacteria</i>  | <i>Actinobacteria</i>      | <i>Acidimicrobiales</i>   | <i>Other</i>              | <i>Other</i> | 0           | 1,19968E-06     | 0,34957<br>4806 |
| <i>Bacteria</i> | <i>Bacteroidetes</i>   | <i>Flavobacteriia</i>      | <i>Flavobacteriales</i>   | <i>Other</i>              | <i>Other</i> | 0,000000597 | 1,17544E-06     | 1               |
| <i>Archaea</i>  | <i>Euryarchaeota</i>   | <i>Other</i>               | <i>Other</i>              | <i>Other</i>              | <i>Other</i> | 0           | 1,17544E-06     | 0,34957<br>4806 |
| <i>Bacteria</i> | <i>Firmicutes</i>      | <i>Clostridia</i>          | <i>Clostridiales</i>      | <i>Gracilibacteraceae</i> | <i>Other</i> | 0           | 1,17544E-06     | 0,34957<br>4806 |
| <i>Archaea</i>  | <i>Crenarchaeota</i>   | <i>Thermoprotei</i>        | <i>Other</i>              | <i>Other</i>              | <i>Other</i> | 7,7309E-06  | 1,06528E-06     | 0,14887<br>1993 |
| <i>Bacteria</i> | <i>Verrucomicrobia</i> | <i>Other</i>               | <i>Other</i>              | <i>Other</i>              | <i>Other</i> | 0           | 1,06142E-06     | 0,17090<br>352  |
| <i>Bacteria</i> | <i>Firmicutes</i>      | <i>Bacilli</i>             | <i>Bacillales</i>         | <i>Planococcaceae</i>     | <i>Other</i> | 3,5821E-06  | 0,0000010<br>42 | 0,74072<br>6595 |
| <i>Bacteria</i> | <i>Proteobacteria</i>  | <i>Alphaproteobacteria</i> | <i>Rhizobiales</i>        | <i>Other</i>              | <i>Other</i> | 1,59298E-05 | 8,915E-07       | 0,02385<br>6401 |
| <i>Bacteria</i> | <i>Proteobacteria</i>  | <i>Betaproteobacteria</i>  | <i>Burkholderiales</i>    | <i>Oxalobacteraceae</i>   | <i>Other</i> | 7,45463E-06 | 8,84352E-07     | 0,13748<br>5208 |



|                 |                       |                              |                          |                            |              |             |             |             |
|-----------------|-----------------------|------------------------------|--------------------------|----------------------------|--------------|-------------|-------------|-------------|
| <i>Bacteria</i> | <i>Proteobacteria</i> | <i>Gammaproteobacteria</i>   | <i>Xanthomonadales</i>   | <i>Xanthomonadaceae</i>    | <i>Other</i> | 6,64222E-06 | 5,99838E-07 | 0,010075007 |
| <i>Bacteria</i> | <i>Proteobacteria</i> | <i>Alphaproteobacteria</i>   | <i>Rhizobiales</i>       | <i>Phyllobacteriaceae</i>  | <i>Other</i> | 1,41306E-06 | 5,99838E-07 | 0,844911363 |
| <i>Bacteria</i> | <i>Bacteroidetes</i>  | <i>Cytophagia</i>            | <i>Cytophagales</i>      | <i>Cytophagaceae</i>       | <i>Other</i> | 0           | 5,87721E-07 | 0,349574806 |
| <i>Bacteria</i> | <i>Firmicutes</i>     | <i>Clostridia</i>            | <i>Clostridiales</i>     | <i>Peptococcaceae 1</i>    | <i>Other</i> | 0           | 4,62949E-07 | 0,349574806 |
| <i>Bacteria</i> | <i>Proteobacteria</i> | <i>Epsilonproteobacteria</i> | <i>Campylobacterales</i> | <i>Helicobacteraceae</i>   | <i>Other</i> | 0           | 4,42176E-07 | 0,349574806 |
| <i>Bacteria</i> | <i>Proteobacteria</i> | <i>Gammaproteobacteria</i>   | <i>Aeromonadales</i>     | <i>Other</i>               | <i>Other</i> | 0           | 4,42176E-07 | 0,349574806 |
| <i>Bacteria</i> | <i>Proteobacteria</i> | <i>Alphaproteobacteria</i>   | <i>Rhodospirillales</i>  | <i>Other</i>               | <i>Other</i> | 7,3632E-06  | 2,99919E-07 | 0,844911363 |
| <i>Bacteria</i> | <i>Proteobacteria</i> | <i>Alphaproteobacteria</i>   | <i>Rhodospirillales</i>  | <i>Acetobacteraceae</i>    | <i>Other</i> | 0           | 2,99919E-07 | 0,349574806 |
| <i>Bacteria</i> | <i>Firmicutes</i>     | <i>Bacilli</i>               | <i>Lactobacillales</i>   | <i>Leuconostocaceae</i>    | <i>Other</i> | 0           | 2,91662E-07 | 0,349574806 |
| <i>Bacteria</i> | <i>Proteobacteria</i> | <i>Gammaproteobacteria</i>   | <i>Pseudomonadales</i>   | <i>Pseudomonadaceae</i>    | <i>Other</i> | 9,07211E-05 | 0           | 0,005853245 |
| <i>Bacteria</i> | <i>Firmicutes</i>     | <i>Bacilli</i>               | <i>Bacillales</i>        | <i>Bacillaceae 1</i>       | <i>Other</i> | 4,20572E-05 | 0           | 0,285049407 |
| <i>Bacteria</i> | <i>Proteobacteria</i> | <i>Alphaproteobacteria</i>   | <i>Sphingomonadales</i>  | <i>Erythrobacteraceae</i>  | <i>Other</i> | 2,25969E-05 | 0           | 0,117601295 |
| <i>Bacteria</i> | <i>Actinobacteria</i> | <i>Actinobacteria</i>        | <i>Actinomycetales</i>   | <i>Kineosporiaceae</i>     | <i>Other</i> | 1,75127E-05 | 0           | 0,117601295 |
| <i>Bacteria</i> | <i>Actinobacteria</i> | <i>Actinobacteria</i>        | <i>Actinomycetales</i>   | <i>Geodermatophilaceae</i> | <i>Other</i> | 1,07278E-05 | 0           | 0,117601295 |
| <i>Bacteria</i> | <i>Firmicutes</i>     | <i>Bacilli</i>               | <i>Bacillales</i>        | <i>Bacillaceae 2</i>       | <i>Other</i> | 7,28833E-06 | 0           | 0,047105791 |
| <i>Bacteria</i> | <i>Proteobacteria</i> | <i>Gammaproteobacteria</i>   | <i>Oceanospirillales</i> | <i>Other</i>               | <i>Other</i> | 7,16419E-06 | 0           | 0,285049407 |
| <i>Bacteria</i> | <i>Proteobacteria</i> | <i>Deltaproteobacteria</i>   | <i>Myxococcales</i>      | <i>Polyangiaceae</i>       | <i>Other</i> | 3,06246E-06 | 0           | 0,285049407 |
| <i>Bacteria</i> | <i>Proteobacteria</i> | <i>Gammaproteobacteria</i>   | <i>Vibrionales</i>       | <i>Vibrionaceae</i>        | <i>Other</i> | 2,0101E-06  | 0           | 0,117601295 |

|                 |                       |                              |                           |                           |                          |             |                 |                 |
|-----------------|-----------------------|------------------------------|---------------------------|---------------------------|--------------------------|-------------|-----------------|-----------------|
| <i>Bacteria</i> | <i>Proteobacteria</i> | <i>Alphaproteobacteria</i>   | <i>Caulobacteriales</i>   | <i>Caulobacteraceae</i>   | <i>Other</i>             | 1,9431E-06  | 0               | 0,11760<br>1295 |
| <i>Bacteria</i> | <i>Bacteroidetes</i>  | <i>Flavobacteriia</i>        | <i>Flavobacteriales</i>   | <i>Cryomorphaceae</i>     | <i>Other</i>             | 0,000000995 | 0               | 0,28504<br>9407 |
| <i>Bacteria</i> | <i>Chloroflexi</i>    | <i>Other</i>                 | <i>Other</i>              | <i>Other</i>              | <i>Other</i>             | 0,000000862 | 0               | 0,28504<br>9407 |
| <i>Bacteria</i> | <i>Proteobacteria</i> | <i>Gammaproteobacteria</i>   | <i>Oceanospirillales</i>  | <i>Oceanospirillaceae</i> | <i>Other</i>             | 0,000000796 | 0               | 0,28504<br>9407 |
| <i>Bacteria</i> | <i>Proteobacteria</i> | <i>Alphaproteobacteria</i>   | <i>Rhizobiales</i>        | <i>Brucellaceae</i>       | <i>Other</i>             | 6,37101E-07 | 0               | 0,11760<br>1295 |
| <i>Bacteria</i> | <i>Proteobacteria</i> | <i>Epsilonproteobacteria</i> | <i>Campylobacteriales</i> | <i>Campylobacteraceae</i> | <i>Other</i>             | 0,000000398 | 0               | 0,28504<br>9407 |
| <i>Bacteria</i> | <i>Proteobacteria</i> | <i>Betaproteobacteria</i>    | <i>Burkholderiales</i>    | <i>Oxalobacteraceae</i>   | <i>Oxalobacter</i>       | 0           | 0,0001160<br>42 | 0,00210<br>2622 |
| <i>Bacteria</i> | <i>Proteobacteria</i> | <i>Betaproteobacteria</i>    | <i>Burkholderiales</i>    | <i>Alcaligenaceae</i>     | <i>Paenalcaligenes</i>   | 0,000242556 | 9,89237E-<br>07 | 0,36284<br>8315 |
| <i>Bacteria</i> | <i>Firmicutes</i>     | <i>Bacilli</i>               | <i>Bacillales</i>         | <i>Paenibacillaceae 1</i> | <i>Paenibacillus</i>     | 1,99005E-06 | 0               | 0,28504<br>9407 |
| <i>Bacteria</i> | <i>Proteobacteria</i> | <i>Alphaproteobacteria</i>   | <i>Rhizobiales</i>        | <i>Brucellaceae</i>       | <i>Paenochrobactrum</i>  | 2,84578E-05 | 1,97847E-<br>06 | 0,84491<br>1363 |
| <i>Bacteria</i> | <i>Bacteroidetes</i>  | <i>Bacteroidia</i>           | <i>Bacteroidales</i>      | <i>Porphyromonadaceae</i> | <i>Paludibacter</i>      | 0,00022408  | 0,0009513<br>21 | 0,24546<br>6862 |
| <i>Bacteria</i> | <i>Proteobacteria</i> | <i>Gammaproteobacteria</i>   | <i>Enterobacteriales</i>  | <i>Enterobacteriaceae</i> | <i>Pantoea</i>           | 5,70972E-06 | 9,25898E-<br>07 | 0,45657<br>0763 |
| <i>Bacteria</i> | <i>Firmicutes</i>     | <i>Clostridia</i>            | <i>Clostridiales</i>      | <i>Ruminococcaceae</i>    | <i>Papillibacter</i>     | 2,84254E-05 | 0,0003378<br>2  | 0,15149<br>3992 |
| <i>Bacteria</i> | <i>Bacteroidetes</i>  | <i>Bacteroidia</i>           | <i>Bacteroidales</i>      | <i>Porphyromonadaceae</i> | <i>Parabacteroides</i>   | 0,000228437 | 0,0007073<br>13 | 0,48745<br>329  |
| <i>Bacteria</i> | <i>Proteobacteria</i> | <i>Alphaproteobacteria</i>   | <i>Rhodobacterales</i>    | <i>Rhodobacteraceae</i>   | <i>Paracoccus</i>        | 0,000133918 | 3,83897E-<br>05 | 0,01041<br>4995 |
| <i>Bacteria</i> | <i>Actinobacteria</i> | <i>Actinobacteria</i>        | <i>Coriobacteriales</i>   | <i>Coriobacteriaceae</i>  | <i>Paraeggerthella</i>   | 0,000010592 | 7,09705E-<br>06 | 0,76508<br>7193 |
| <i>Bacteria</i> | <i>Firmicutes</i>     | <i>Bacilli</i>               | <i>Lactobacillales</i>    | <i>Lactobacillaceae</i>   | <i>Paralactobacillus</i> | 2,11959E-06 | 3,87194E-<br>05 | 0,00280<br>7439 |
| <i>Bacteria</i> | <i>Proteobacteria</i> | <i>Gammaproteobacteria</i>   | <i>Pseudomonadales</i>    | <i>Moraxellaceae</i>      | <i>Paraperlucidibaca</i> | 0           | 2,99919E-<br>07 | 0,34957<br>4806 |

|                 |                       |                                                 |                                                 |                                                 |                                                  |             |                 |                 |
|-----------------|-----------------------|-------------------------------------------------|-------------------------------------------------|-------------------------------------------------|--------------------------------------------------|-------------|-----------------|-----------------|
| <i>Bacteria</i> | <i>Bacteroidetes</i>  | <i>Bacteroidia</i>                              | <i>Bacteroidales</i>                            | <i>Prevotellaceae</i>                           | <i>Paraprevotella</i>                            | 9,81604E-05 | 0,0107139<br>98 | 0,02789<br>0529 |
| <i>Bacteria</i> | <i>Proteobacteria</i> | <i>Betaproteobacteria</i>                       | <i>Burkholderiales</i>                          | <i>Alcaligenaceae</i>                           | <i>Parapusillimonas</i>                          | 0,000000398 | 0               | 0,28504<br>9407 |
| <i>Bacteria</i> | <i>Bacteroidetes</i>  | <i>Sphingobacteriia</i>                         | <i>Sphingobacteriales</i>                       | <i>Chitinophagaceae</i>                         | <i>Parasegetibacter</i>                          | 0           | 2,91662E-<br>07 | 0,34957<br>4806 |
| <i>Bacteria</i> | <i>Firmicutes</i>     | <i>Clostridia</i>                               | <i>Clostridiales</i>                            | <i>Lachnospiraceae</i>                          | <i>Parasporobacterium</i>                        | 7,06532E-07 | 4,57716E-<br>05 | 0,01708<br>1066 |
| <i>Bacteria</i> | <i>Proteobacteria</i> | <i>Betaproteobacteria</i>                       | <i>Burkholderiales</i>                          | <i>Sutterellaceae</i>                           | <i>Parasutterella</i>                            | 3,17413E-05 | 8,94758E-<br>05 | 0,37002<br>7712 |
| <i>Bacteria</i> | <i>Parcubacteria</i>  | <i>Parcubacteria_genera_ince<br/>rtae_sedis</i> | <i>Parcubacteria_genera<br/>_incertae_sedis</i> | <i>Parcubacteria_genera_in<br/>certae_sedis</i> | <i>Parcubacteria_genera<br/>_incertae_sedis</i>  | 0           | 7,39733E-<br>07 | 0,34957<br>4806 |
| <i>Bacteria</i> | <i>Firmicutes</i>     | <i>Clostridia</i>                               | <i>Clostridiales</i>                            | <i>Clostridiales_Incertae<br/>Sedis XI</i>      | <i>Parvimonas</i>                                | 8,1594E-06  | 7,30815E-<br>06 | 0,79400<br>268  |
| <i>Bacteria</i> | <i>Proteobacteria</i> | <i>Gammaproteobacteria</i>                      | <i>Pasteurellales</i>                           | <i>Pasteurellaceae</i>                          | <i>Pasteurella</i>                               | 0,000176255 | 0,0001208<br>68 | 0,60220<br>0006 |
| <i>Bacteria</i> | <i>Firmicutes</i>     | <i>Bacilli</i>                                  | <i>Lactobacillales</i>                          | <i>Lactobacillaceae</i>                         | <i>Pediococcus</i>                               | 0,000496375 | 6,58156E-<br>06 | 0,05582<br>9295 |
| <i>Bacteria</i> | <i>Bacteroidetes</i>  | <i>Sphingobacteriia</i>                         | <i>Sphingobacteriales</i>                       | <i>Sphingobacteriaceae</i>                      | <i>Pedobacter</i>                                | 2,58607E-06 | 4,62949E-<br>07 | 0,84491<br>1363 |
| <i>Bacteria</i> | <i>Proteobacteria</i> | <i>Alphaproteobacteria</i>                      | <i>Rhizobiales</i>                              | <i>Hyphomicrobiaceae</i>                        | <i>Pedomicrobium</i>                             | 7,32089E-06 | 0               | 0,28504<br>9407 |
| <i>Bacteria</i> | <i>Proteobacteria</i> | <i>Alphaproteobacteria</i>                      | <i>Rhizobiales</i>                              | <i>Hyphomicrobiaceae</i>                        | <i>Pelagibacterium</i>                           | 0           | 3,29911E-<br>06 | 0,34957<br>4806 |
| <i>Bacteria</i> | <i>Proteobacteria</i> | <i>Betaproteobacteria</i>                       | <i>Burkholderiales</i>                          | <i>Comamonadaceae</i>                           | <i>Pelomonas</i>                                 | 0,000933318 | 9,65865E-<br>06 | 0,00096<br>7429 |
| <i>Bacteria</i> | <i>Firmicutes</i>     | <i>Clostridia</i>                               | <i>Clostridiales</i>                            | <i>Syntrophomonadaceae</i>                      | <i>Pelospora</i>                                 | 0           | 0,0000025<br>02 | 0,17090<br>352  |
| <i>Bacteria</i> | <i>Firmicutes</i>     | <i>Clostridia</i>                               | <i>Clostridiales</i>                            | <i>Peptococcaceae 1</i>                         | <i>Peptococcus</i>                               | 2,92096E-05 | 0,0001423<br>96 | 0,06170<br>669  |
| <i>Bacteria</i> | <i>Firmicutes</i>     | <i>Clostridia</i>                               | <i>Clostridiales</i>                            | <i>Clostridiales_Incertae<br/>Sedis XI</i>      | <i>Peptoniphilus</i>                             | 5,37567E-05 | 0,0001299<br>6  | 0,85771<br>4481 |
| <i>Bacteria</i> | <i>Firmicutes</i>     | <i>Clostridia</i>                               | <i>Clostridiales</i>                            | <i>Peptostreptococcaceae</i>                    | <i>Peptostreptococcacea<br/>e_incertae_sedis</i> | 2,95543E-05 | 1,79951E-<br>06 | 0,18132<br>0849 |
| <i>Bacteria</i> | <i>Firmicutes</i>     | <i>Clostridia</i>                               | <i>Clostridiales</i>                            | <i>Peptostreptococcaceae</i>                    | <i>Peptostreptococcus</i>                        | 0,00012851  | 2,84327E-<br>05 | 0,12023<br>2801 |

|                 |                       |                                      |                          |                             |                                      |             |             |                 |
|-----------------|-----------------------|--------------------------------------|--------------------------|-----------------------------|--------------------------------------|-------------|-------------|-----------------|
| <i>Bacteria</i> | <i>Proteobacteria</i> | <i>Deltaproteobacteria</i>           | <i>Bdellovibrionales</i> | <i>Bacteriovoraceae</i>     | <i>Peredibacter</i>                  | 4,97513E-06 | 1,4996E-06  | 0,84491<br>1363 |
| <i>Bacteria</i> | <i>Proteobacteria</i> | <i>Gammaproteobacteria</i>           | <i>Pseudomonadales</i>   | <i>Moraxellaceae</i>        | <i>Perlucidibaca</i>                 | 0           | 6,89814E-06 | 0,34957<br>4806 |
| <i>Bacteria</i> | <i>Bacteroidetes</i>  | <i>Bacteroidia</i>                   | <i>Bacteroidales</i>     | <i>Porphyromonadaceae</i>   | <i>Petrimonas</i>                    | 0,000649814 | 6,53192E-05 | 0,94507<br>1382 |
| <i>Bacteria</i> | <i>Firmicutes</i>     | <i>Negativicutes</i>                 | <i>Selenomonadales</i>   | <i>Acidaminococcaceae</i>   | <i>Phascolarctobacterium</i>         | 0,000432971 | 0,030125145 | 0,00381<br>3532 |
| <i>Bacteria</i> | <i>Proteobacteria</i> | <i>Deltaproteobacteria</i>           | <i>Myxococcales</i>      | <i>Phaselicystidaceae</i>   | <i>Phaselicystis</i>                 | 1,83022E-06 | 0           | 0,28504<br>9407 |
| <i>Bacteria</i> | <i>Proteobacteria</i> | <i>Alphaproteobacteria</i>           | <i>Rhizobiales</i>       | <i>Phyllobacteriaceae</i>   | <i>Phyllobacterium</i>               | 0           | 0,000059531 | 0,00611<br>1784 |
| <i>Bacteria</i> | <i>Firmicutes</i>     | <i>Bacilli</i>                       | <i>Lactobacillales</i>   | <i>Enterococcaceae</i>      | <i>Pilibacter</i>                    | 0           | 2,99919E-07 | 0,34957<br>4806 |
| <i>Bacteria</i> | <i>Bacteroidetes</i>  | <i>Flavobacteriia</i>                | <i>Flavobacteriales</i>  | <i>Flavobacteriaceae</i>    | <i>Planobacterium</i>                | 0,003220167 | 0,000760112 | 0,03389<br>4854 |
| <i>Bacteria</i> | <i>Firmicutes</i>     | <i>Bacilli</i>                       | <i>Bacillales</i>        | <i>Planococcaceae</i>       | <i>Planococcaceae_incertae_sedis</i> | 7,94526E-05 | 2,28458E-05 | 0,19895<br>8931 |
| <i>Bacteria</i> | <i>Firmicutes</i>     | <i>Bacilli</i>                       | <i>Bacillales</i>        | <i>Planococcaceae</i>       | <i>Planomicrobium</i>                | 9,17128E-06 | 0           | 0,11760<br>1295 |
| <i>Bacteria</i> | <i>Proteobacteria</i> | <i>Betaproteobacteria</i>            | <i>Burkholderiales</i>   | <i>Burkholderiaceae</i>     | <i>Polynucleobacter</i>              | 0           | 2,42065E-06 | 0,17090<br>352  |
| <i>Bacteria</i> | <i>Bacteroidetes</i>  | <i>Cytophagia</i>                    | <i>Cytophagales</i>      | <i>Cytophagaceae</i>        | <i>Pontibacter</i>                   | 0           | 2,3333E-06  | 0,34957<br>4806 |
| <i>Bacteria</i> | <i>Proteobacteria</i> | <i>Alphaproteobacteria</i>           | <i>Sphingomonadales</i>  | <i>Erythrobacteraceae</i>   | <i>Porphyrobacter</i>                | 3,44809E-06 | 0           | 0,28504<br>9407 |
| <i>Bacteria</i> | <i>Bacteroidetes</i>  | <i>Bacteroidia</i>                   | <i>Bacteroidales</i>     | <i>Porphyromonadaceae</i>   | <i>Porphyromonas</i>                 | 0,000737638 | 9,34212E-05 | 0,00771<br>9174 |
| <i>Bacteria</i> | <i>Bacteroidetes</i>  | <i>Bacteroidia</i>                   | <i>Bacteroidales</i>     | <i>Prevotellaceae</i>       | <i>Prevotella</i>                    | 0,003662488 | 0,141538222 | 0,08257<br>9274 |
| <i>Bacteria</i> | <i>Bacteroidetes</i>  | <i>Bacteroidetes"_incertae_sedis</i> | <i>Prolixibacter</i>     | <i>Prolixibacter</i>        | <i>Prolixibacter</i>                 | 0           | 4,42176E-07 | 0,34957<br>4806 |
| <i>Bacteria</i> | <i>Actinobacteria</i> | <i>Actinobacteria</i>                | <i>Actinomycetales</i>   | <i>Propionibacteriaceae</i> | <i>Propionibacterium</i>             | 0,003445225 | 4,01923E-05 | 0,00114<br>5938 |
| <i>Bacteria</i> | <i>Actinobacteria</i> | <i>Actinobacteria</i>                | <i>Actinomycetales</i>   | <i>Propionibacteriaceae</i> | <i>Propionicicella</i>               | 0,000000796 | 0,000023078 | 0,50811<br>0562 |

|                 |                       |                            |                           |                              |                               |             |             |             |
|-----------------|-----------------------|----------------------------|---------------------------|------------------------------|-------------------------------|-------------|-------------|-------------|
| <i>Bacteria</i> | <i>Actinobacteria</i> | <i>Actinobacteria</i>      | <i>Actinomycetales</i>    | <i>Propionibacteriaceae</i>  | <i>Propionimonas</i>          | 0           | 4,39357E-06 | 0,17090352  |
| <i>Bacteria</i> | <i>Fusobacteria</i>   | <i>Fusobacteriia</i>       | <i>Fusobacteriales</i>    | <i>Fusobacteriaceae</i>      | <i>Propionigenium</i>         | 5,72662E-05 | 9,29749E-06 | 0,234763663 |
| <i>Bacteria</i> | <i>Actinobacteria</i> | <i>Actinobacteria</i>      | <i>Actinomycetales</i>    | <i>Propionibacteriaceae</i>  | <i>Propionimicrobium</i>      | 0           | 9,89237E-07 | 0,349574806 |
| <i>Bacteria</i> | <i>Firmicutes</i>     | <i>Clostridia</i>          | <i>Clostridiales</i>      | <i>Clostridiaceae 1</i>      | <i>Proteiniclasticum</i>      | 2,18624E-05 | 1,97947E-05 | 0,562548843 |
| <i>Bacteria</i> | <i>Bacteroidetes</i>  | <i>Bacteroidia</i>         | <i>Bacteroidales</i>      | <i>Porphyromonadaceae</i>    | <i>Proteiniphilum</i>         | 8,2193E-06  | 5,99838E-06 | 0,562548843 |
| <i>Bacteria</i> | <i>Firmicutes</i>     | <i>Clostridia</i>          | <i>Clostridiales</i>      | <i>Peptostreptococcaceae</i> | <i>Proteocatella</i>          | 2,01371E-05 | 0,00002846  | 0,881930721 |
| <i>Bacteria</i> | <i>Proteobacteria</i> | <i>Gammaproteobacteria</i> | <i>Enterobacteriales</i>  | <i>Enterobacteriaceae</i>    | <i>Proteus</i>                | 4,82203E-05 | 0           | 0,117601295 |
| <i>Bacteria</i> | <i>Proteobacteria</i> | <i>Gammaproteobacteria</i> | <i>Enterobacteriales</i>  | <i>Enterobacteriaceae</i>    | <i>Providencia</i>            | 0,000115224 | 0           | 0,285049407 |
| <i>Bacteria</i> | <i>Firmicutes</i>     | <i>Clostridia</i>          | <i>Clostridiales</i>      | <i>Lachnospiraceae</i>       | <i>Pseudobutyrvibrio</i>      | 0           | 4,55022E-05 | 0,015891197 |
| <i>Bacteria</i> | <i>Proteobacteria</i> | <i>Alphaproteobacteria</i> | <i>Rhizobiales</i>        | <i>Brucellaceae</i>          | <i>Pseudochrobactrum</i>      | 4,17911E-06 | 1,28916E-06 | 0,740726595 |
| <i>Bacteria</i> | <i>Actinobacteria</i> | <i>Actinobacteria</i>      | <i>Actinomycetales</i>    | <i>Microbacteriaceae</i>     | <i>Pseudoclavibacter</i>      | 0,000001061 | 1,4211E-06  | 0,562548843 |
| <i>Bacteria</i> | <i>Firmicutes</i>     | <i>Clostridia</i>          | <i>Clostridiales</i>      | <i>Ruminococcaceae</i>       | <i>Pseudoflavonifractor</i>   | 0,000168818 | 0,001182566 | 0,164537456 |
| <i>Bacteria</i> | <i>Proteobacteria</i> | <i>Gammaproteobacteria</i> | <i>Pseudomonadales</i>    | <i>Pseudomonadaceae</i>      | <i>Pseudomonas</i>            | 0,003370249 | 1,76785E-05 | 0,001181672 |
| <i>Bacteria</i> | <i>Actinobacteria</i> | <i>Actinobacteria</i>      | <i>Actinomycetales</i>    | <i>Pseudonocardiaceae</i>    | <i>Pseudonocardia</i>         | 8,45928E-06 | 0           | 0,285049407 |
| <i>Bacteria</i> | <i>Firmicutes</i>     | <i>Clostridia</i>          | <i>Clostridiales</i>      | <i>Eubacteriaceae</i>        | <i>Pseudoramibacter</i>       | 0           | 2,57831E-06 | 0,17090352  |
| <i>Bacteria</i> | <i>Bacteroidetes</i>  | <i>Sphingobacteriia</i>    | <i>Sphingobacteriales</i> | <i>Sphingobacteriaceae</i>   | <i>Pseudosphingobacterium</i> | 0           | 0,000005459 | 0,17090352  |
| <i>Bacteria</i> | <i>Proteobacteria</i> | <i>Alphaproteobacteria</i> | <i>Rhodobacterales</i>    | <i>Rhodobacteraceae</i>      | <i>Pseudovibrio</i>           | 1,18964E-05 | 0           | 0,285049407 |
| <i>Bacteria</i> | <i>Proteobacteria</i> | <i>Gammaproteobacteria</i> | <i>Xanthomonadales</i>    | <i>Xanthomonadaceae</i>      | <i>Pseudoxanthomonas</i>      | 0,000169018 | 0           | 0,047105791 |

|                 |                       |                            |                         |                          |                         |             |             |             |
|-----------------|-----------------------|----------------------------|-------------------------|--------------------------|-------------------------|-------------|-------------|-------------|
| <i>Bacteria</i> | <i>Firmicutes</i>     | <i>Bacilli</i>             | <i>Bacillales</i>       | <i>Planococcaceae</i>    | <i>Psychrobacillus</i>  | 3,06667E-06 | 5,26166E-06 | 0,619656703 |
| <i>Bacteria</i> | <i>Proteobacteria</i> | <i>Gammaproteobacteria</i> | <i>Pseudomonadales</i>  | <i>Moraxellaceae</i>     | <i>Psychrobacter</i>    | 0,002760908 | 0,055317475 | 0,562833754 |
| <i>Bacteria</i> | <i>Firmicutes</i>     | <i>Negativicutes</i>       | <i>Selenomonadales</i>  | <i>Veillonellaceae</i>   | <i>Psychrosinus</i>     | 0           | 4,73698E-07 | 0,349574806 |
| <i>Bacteria</i> | <i>Proteobacteria</i> | <i>Betaproteobacteria</i>  | <i>Burkholderiales</i>  | <i>Alcaligenaceae</i>    | <i>Pusillimonas</i>     | 1,06968E-05 | 0           | 0,117601295 |
| <i>Bacteria</i> | <i>Synergistetes</i>  | <i>Synergistia</i>         | <i>Synergistales</i>    | <i>Synergistaceae</i>    | <i>Pyramidobacter</i>   | 7,3796E-06  | 6,91294E-05 | 0,090155978 |
| <i>Bacteria</i> | <i>Proteobacteria</i> | <i>Betaproteobacteria</i>  | <i>Burkholderiales</i>  | <i>Burkholderiaceae</i>  | <i>Ralstonia</i>        | 0           | 9,57264E-06 | 0,17090352  |
| <i>Bacteria</i> | <i>Actinobacteria</i> | <i>Actinobacteria</i>      | <i>Actinomycetales</i>  | <i>Micrococcaceae</i>    | <i>Renibacterium</i>    | 0,000230735 | 0           | 0,000440292 |
| <i>Bacteria</i> | <i>Proteobacteria</i> | <i>Gammaproteobacteria</i> | <i>Chromatiales</i>     | <i>Chromatiaceae</i>     | <i>Rheinheimera</i>     | 0,000166427 | 7,19806E-06 | 0,084991283 |
| <i>Bacteria</i> | <i>Proteobacteria</i> | <i>Gammaproteobacteria</i> | <i>Pseudomonadales</i>  | <i>Pseudomonadaceae</i>  | <i>Rhizobacter</i>      | 1,41306E-06 | 0           | 0,285049407 |
| <i>Bacteria</i> | <i>Proteobacteria</i> | <i>Alphaproteobacteria</i> | <i>Rhizobiales</i>      | <i>Rhizobiaceae</i>      | <i>Rhizobium</i>        | 0,000299533 | 2,23507E-05 | 0,010825507 |
| <i>Bacteria</i> | <i>Proteobacteria</i> | <i>Alphaproteobacteria</i> | <i>Rhodobacterales</i>  | <i>Rhodobacteraceae</i>  | <i>Rhodobacter</i>      | 1,01337E-05 | 1,16968E-05 | 0,147940923 |
| <i>Bacteria</i> | <i>Actinobacteria</i> | <i>Actinobacteria</i>      | <i>Actinomycetales</i>  | <i>Nocardiaceae</i>      | <i>Rhodococcus</i>      | 0,000397734 | 0           | 0,000440292 |
| <i>Bacteria</i> | <i>Bacteroidetes</i>  | <i>Flavobacteriia</i>      | <i>Flavobacteriales</i> | <i>Flavobacteriaceae</i> | <i>Riemerella</i>       | 2,20421E-05 | 3,16277E-05 | 0,72367361  |
| <i>Bacteria</i> | <i>Firmicutes</i>     | <i>Clostridia</i>          | <i>Clostridiales</i>    | <i>Lachnospiraceae</i>   | <i>Robinsoniella</i>    | 1,58104E-05 | 1,43536E-05 | 0,083081187 |
| <i>Bacteria</i> | <i>Firmicutes</i>     | <i>Clostridia</i>          | <i>Clostridiales</i>    | <i>Lachnospiraceae</i>   | <i>Roseburia</i>        | 0,000198163 | 0,02474264  | 0,005478553 |
| <i>Bacteria</i> | <i>Proteobacteria</i> | <i>Alphaproteobacteria</i> | <i>Rhodobacterales</i>  | <i>Rhodobacteraceae</i>  | <i>Roseovarius</i>      | 7,06532E-07 | 0           | 0,285049407 |
| <i>Bacteria</i> | <i>Actinobacteria</i> | <i>Actinobacteria</i>      | <i>Actinomycetales</i>  | <i>Micrococcaceae</i>    | <i>Rothia</i>           | 0,005578648 | 0,014062349 | 0,816961322 |
| <i>Bacteria</i> | <i>Proteobacteria</i> | <i>Alphaproteobacteria</i> | <i>Rhodobacterales</i>  | <i>Rhodobacteraceae</i>  | <i>Rubellimicrobium</i> | 1,02082E-06 | 0,000002625 | 1           |

|                 |                                        |                                               |                                               |                                               |                                               |             |                 |                 |
|-----------------|----------------------------------------|-----------------------------------------------|-----------------------------------------------|-----------------------------------------------|-----------------------------------------------|-------------|-----------------|-----------------|
| <i>Bacteria</i> | <i>Actinobacteria</i>                  | <i>Actinobacteria</i>                         | <i>Rubrobacterales</i>                        | <i>Rubrobacteraceae</i>                       | <i>Rubrobacter</i>                            | 1,03443E-05 | 0               | 0,28504<br>9407 |
| <i>Bacteria</i> | <i>Proteobacteria</i>                  | <i>Gammaproteobacteria</i>                    | <i>Aeromonadales</i>                          | <i>Succinivibrionaceae</i>                    | <i>Ruminobacter</i>                           | 3,18408E-06 | 6,11115E-05     | 0,23476<br>3663 |
| <i>Bacteria</i> | <i>Firmicutes</i>                      | <i>Clostridia</i>                             | <i>Clostridiales</i>                          | <i>Ruminococcaceae</i>                        | <i>Ruminococcus</i>                           | 0,000655817 | 0,0044396<br>34 | 0,10519<br>2505 |
| <i>Bacteria</i> | <i>Firmicutes</i>                      | <i>Clostridia</i>                             | <i>Clostridiales</i>                          | <i>Lachnospiraceae</i>                        | <i>Ruminococcus2</i>                          | 0,000146657 | 0,0007389<br>94 | 0,02063<br>7558 |
| <i>Bacteria</i> | <i>Candidatus<br/>Saccharibacteria</i> | <i>Saccharibacteria_genera_incertae_sedis</i> | <i>Saccharibacteria_genera_incertae_sedis</i> | <i>Saccharibacteria_genera_incertae_sedis</i> | <i>Saccharibacteria_genera_incertae_sedis</i> | 0,000213031 | 0,0006291<br>93 | 0,56283<br>3754 |
| <i>Bacteria</i> | <i>Firmicutes</i>                      | <i>Clostridia</i>                             | <i>Clostridiales</i>                          | <i>Ruminococcaceae</i>                        | <i>Saccharofermentans</i>                     | 0,000000597 | 6,30203E-05     | 0,00341<br>4791 |
| <i>Bacteria</i> | <i>Actinobacteria</i>                  | <i>Actinobacteria</i>                         | <i>Actinomycetales</i>                        | <i>Pseudonocardiaceae</i>                     | <i>Saccharomonospora</i>                      | 0           | 8,99757E-07     | 0,34957<br>4806 |
| <i>Bacteria</i> | <i>Firmicutes</i>                      | <i>Bacilli</i>                                | <i>Bacillales</i>                             | <i>Staphylococcaceae</i>                      | <i>Salinicoccus</i>                           | 1,48372E-05 | 3,65635E-06     | 0,74072<br>6595 |
| <i>Bacteria</i> | <i>Bacteroidetes</i>                   | <i>Flavobacteriia</i>                         | <i>Flavobacteriales</i>                       | <i>Flavobacteriaceae</i>                      | <i>Salinimicrobium</i>                        | 3,44809E-05 | 0               | 0,28504<br>9407 |
| <i>Bacteria</i> | <i>Proteobacteria</i>                  | <i>Gammaproteobacteria</i>                    | <i>Enterobacteriales</i>                      | <i>Enterobacteriaceae</i>                     | <i>Salmonella</i>                             | 0,000012156 | 2,61091E-05     | 0,03809<br>9036 |
| <i>Bacteria</i> | <i>Firmicutes</i>                      | <i>Clostridia</i>                             | <i>Clostridiales</i>                          | <i>Clostridiaceae 1</i>                       | <i>Sarcina</i>                                | 5,09529E-06 | 0,0001261<br>1  | 0,06312<br>8008 |
| <i>Bacteria</i> | <i>Proteobacteria</i>                  | <i>Betaproteobacteria</i>                     | <i>Burkholderiales</i>                        | <i>Comamonadaceae</i>                         | <i>Schlegelella</i>                           | 0,000014486 | 0               | 0,04710<br>5791 |
| <i>Bacteria</i> | <i>Firmicutes</i>                      | <i>Negativicutes</i>                          | <i>Selenomonadales</i>                        | <i>Veillonellaceae</i>                        | <i>Schwartzia</i>                             | 2,11959E-06 | 0,0035946<br>95 | 0,00280<br>7439 |
| <i>Bacteria</i> | <i>Firmicutes</i>                      | <i>Clostridia</i>                             | <i>Clostridiales</i>                          | <i>Clostridiales_Incertae_Sedis XI</i>        | <i>Sedimentibacter</i>                        | 3,98011E-06 | 0               | 0,28504<br>9407 |
| <i>Bacteria</i> | <i>Firmicutes</i>                      | <i>Negativicutes</i>                          | <i>Selenomonadales</i>                        | <i>Veillonellaceae</i>                        | <i>Selenomonas</i>                            | 6,91351E-05 | 0,0109973<br>37 | 0,02789<br>0529 |
| <i>Bacteria</i> | <i>Actinobacteria</i>                  | <i>Actinobacteria</i>                         | <i>Actinomycetales</i>                        | <i>Beutenbergiaceae</i>                       | <i>Serinibacter</i>                           | 0           | 0,0001298<br>65 | 0,34957<br>4806 |
| <i>Bacteria</i> | <i>Proteobacteria</i>                  | <i>Gammaproteobacteria</i>                    | <i>Pseudomonadales</i>                        | <i>Pseudomonadaceae</i>                       | <i>Serpens</i>                                | 3,61881E-05 | 2,99919E-07     | 0,04571<br>4365 |
| <i>Bacteria</i> | <i>Proteobacteria</i>                  | <i>Gammaproteobacteria</i>                    | <i>Enterobacteriales</i>                      | <i>Enterobacteriaceae</i>                     | <i>Serratia</i>                               | 0           | 1,45831E-06     | 0,34957<br>4806 |

|                 |                       |                            |                            |                             |                         |             |                 |                 |
|-----------------|-----------------------|----------------------------|----------------------------|-----------------------------|-------------------------|-------------|-----------------|-----------------|
| <i>Bacteria</i> | <i>Firmicutes</i>     | <i>Erysipelotrichia</i>    | <i>Erysipelotrichales</i>  | <i>Erysipelotrichaceae</i>  | <i>Sharpea</i>          | 6,03417E-06 | 0               | 0,28504<br>9407 |
| <i>Bacteria</i> | <i>Proteobacteria</i> | <i>Gammaproteobacteria</i> | <i>Alteromonadales</i>     | <i>Shewanellaceae</i>       | <i>Shewanella</i>       | 1,68598E-05 | 6,89814E-06     | 0,14794<br>0923 |
| <i>Bacteria</i> | <i>Proteobacteria</i> | <i>Betaproteobacteria</i>  | <i>Rhodocyclales</i>       | <i>Rhodocyclaceae</i>       | <i>Shinella</i>         | 1,18381E-05 | 2,99919E-07     | 0,13748<br>5208 |
| <i>Bacteria</i> | <i>Firmicutes</i>     | <i>Clostridia</i>          | <i>Clostridiales</i>       | <i>Lachnospiraceae</i>      | <i>Shuttleworthia</i>   | 0           | 5,07992E-06     | 0,08235<br>5525 |
| <i>Bacteria</i> | <i>Proteobacteria</i> | <i>Betaproteobacteria</i>  | <i>Burkholderiales</i>     | <i>Comamonadaceae</i>       | <i>Simplicispira</i>    | 3,18408E-06 | 5,99838E-06     | 1               |
| <i>Bacteria</i> | <i>Proteobacteria</i> | <i>Alphaproteobacteria</i> | <i>Rhodospirillales</i>    | <i>Rhodospirillaceae</i>    | <i>Skermanella</i>      | 0,00003462  | 0               | 0,28504<br>9407 |
| <i>Bacteria</i> | <i>Actinobacteria</i> | <i>Actinobacteria</i>      | <i>Coriobacteriales</i>    | <i>Coriobacteriaceae</i>    | <i>Slackia</i>          | 4,94572E-06 | 1,05067E-06     | 0,74072<br>6595 |
| <i>Bacteria</i> | <i>Fusobacteria</i>   | <i>Fusobacteriia</i>       | <i>Fusobacteriales</i>     | <i>Leptotrichiaceae</i>     | <i>Sneathia</i>         | 0           | 1,80089E-06     | 0,17090<br>352  |
| <i>Bacteria</i> | <i>Actinobacteria</i> | <i>Actinobacteria</i>      | <i>Solirubrobacterales</i> | <i>Solirubrobacteraceae</i> | <i>Solirubrobacter</i>  | 7,75821E-06 | 0               | 0,28504<br>9407 |
| <i>Bacteria</i> | <i>Bacteroidetes</i>  | <i>Flavobacteriia</i>      | <i>Flavobacteriales</i>    | <i>Flavobacteriaceae</i>    | <i>Soonwooa</i>         | 0,000204741 | 3,39191E-05     | 0,80177<br>6827 |
| <i>Bacteria</i> | <i>Chloroflexi</i>    | <i>Thermomicrobia</i>      | <i>Sphaerobacterales</i>   | <i>Sphaerobacteraceae</i>   | <i>Sphaerobacter</i>    | 4,11211E-06 | 1,79951E-06     | 0,45657<br>0763 |
| <i>Bacteria</i> | <i>Spirochaetes</i>   | <i>Spirochaetia</i>        | <i>Spirochaetales</i>      | <i>Spirochaetaceae</i>      | <i>Sphaerochaeta</i>    | 0,000086758 | 0,0014987<br>19 | 0,04893<br>855  |
| <i>Bacteria</i> | <i>Bacteroidetes</i>  | <i>Sphingobacteriia</i>    | <i>Sphingobacteriales</i>  | <i>Sphingobacteriaceae</i>  | <i>Sphingobacterium</i> | 0,000394893 | 3,94684E-05     | 0,19169<br>4602 |
| <i>Bacteria</i> | <i>Proteobacteria</i> | <i>Alphaproteobacteria</i> | <i>Sphingomonadales</i>    | <i>Sphingomonadaceae</i>    | <i>Sphingobium</i>      | 3,11701E-05 | 4,19887E-06     | 0,18132<br>0849 |
| <i>Bacteria</i> | <i>Proteobacteria</i> | <i>Alphaproteobacteria</i> | <i>Sphingomonadales</i>    | <i>Sphingomonadaceae</i>    | <i>Sphingomonas</i>     | 0,000168477 | 0,0002591<br>55 | 0,41788<br>6964 |
| <i>Bacteria</i> | <i>Proteobacteria</i> | <i>Alphaproteobacteria</i> | <i>Sphingomonadales</i>    | <i>Sphingomonadaceae</i>    | <i>Sphingopyxis</i>     | 4,97513E-06 | 0               | 0,28504<br>9407 |
| <i>Bacteria</i> | <i>Proteobacteria</i> | <i>Alphaproteobacteria</i> | <i>Sphingomonadales</i>    | <i>Sphingomonadaceae</i>    | <i>Sphingosinicella</i> | 6,57144E-06 | 0               | 0,28504<br>9407 |
| <i>Bacteria</i> | <i>Spirochaetes</i>   | <i>Spirochaetia</i>        | <i>Spirochaetales</i>      | <i>Spirochaetaceae</i>      | <i>Spirochaeta</i>      | 0           | 4,42176E-07     | 0,34957<br>4806 |



|          |                           |                           |                                    |                                    |                                      |             |             |             |
|----------|---------------------------|---------------------------|------------------------------------|------------------------------------|--------------------------------------|-------------|-------------|-------------|
| Bacteria | Firmicutes                | Clostridia                | Clostridiales                      | Peptostreptococcaceae              | Sporacetigenium                      | 0,000206771 | 0,000127091 | 0,105192505 |
| Bacteria | Firmicutes                | Clostridia                | Clostridiales                      | Ruminococcaceae                    | Sporobacter                          | 0,000108698 | 0,001201708 | 0,010896354 |
| Bacteria | Firmicutes                | Bacilli                   | Bacillales                         | Sporolactobacillaceae              | Sporolactobacillaceae_incertae_sedis | 0           | 4,62949E-07 | 0,349574806 |
| Bacteria | Firmicutes                | Bacilli                   | Bacillales                         | Planococcaceae                     | Sporosarcina                         | 7,3632E-06  | 0           | 0,285049407 |
| Bacteria | SR1                       | SR1_genera_incertae_sedis | SR1_genera_incertae_sedis          | SR1_genera_incertae_sedis          | SR1_genera_incertae_sedis            | 8,8471E-06  | 2,39996E-05 | 0,372857936 |
| Bacteria | Proteobacteria            | Alphaproteobacteria       | Sphingomonadales                   | Sphingomonadaceae                  | Stakelama                            | 7,06532E-07 | 0           | 0,285049407 |
| Bacteria | Firmicutes                | Bacilli                   | Bacillales                         | Staphylococcaceae                  | Staphylococcus                       | 0,014930157 | 0,000286782 | 0,001713496 |
| Bacteria | Proteobacteria            | Gammaproteobacteria       | Xanthomonadales                    | Xanthomonadaceae                   | Stenotrophomonas                     | 0,00044035  | 1,64699E-05 | 0,000967429 |
| Bacteria | Fusobacteria              | Fusobacteriia             | Fusobacteriales                    | Leptotrichiaceae                   | Streptobacillus                      | 8,87339E-05 | 2,39935E-06 | 0,362848315 |
| Bacteria | Firmicutes                | Bacilli                   | Lactobacillales                    | Streptococcaceae                   | Streptococcus                        | 0,015834647 | 0,010277126 | 0,417886964 |
| Bacteria | Actinobacteria            | Actinobacteria            | Actinomycetales                    | Streptomycetaceae                  | Streptomyces                         | 1,73871E-05 | 0           | 0,285049407 |
| Bacteria | Cyanobacteria/Chloroplast | Chloroplast               | Chloroplast                        | Chloroplast                        | Streptophyta                         | 0,001530934 | 0,000120038 | 0,002621822 |
| Bacteria | Verrucomicrobia           | Subdivision5              | Subdivision5_genera_incertae_sedis | Subdivision5_genera_incertae_sedis | Subdivision5_genera_incertae_sedis   | 0,000188272 | 0,00027059  | 0,48745329  |
| Bacteria | Firmicutes                | Clostridia                | Clostridiales                      | Ruminococcaceae                    | Subdoligranulum                      | 0,000000862 | 1,87995E-05 | 0,050186187 |
| Bacteria | Firmicutes                | Negativicutes             | Selenomonadales                    | Acidaminococcaceae                 | Succiniclasticum                     | 0           | 4,42176E-07 | 0,349574806 |
| Bacteria | Firmicutes                | Negativicutes             | Selenomonadales                    | Acidaminococcaceae                 | Succinispira                         | 0           | 4,42176E-07 | 0,349574806 |
| Bacteria | Proteobacteria            | Gammaproteobacteria       | Aeromonadales                      | Succinivibrionaceae                | Succinivibrio                        | 0,000123977 | 0,010582261 | 0,037242545 |
| Bacteria | Proteobacteria            | Betaproteobacteria        | Burkholderiales                    | Sutterellaceae                     | Sutterella                           | 9,13008E-06 | 0,000271033 | 0,031443735 |

|                 |                       |                            |                          |                                         |                         |             |             |             |
|-----------------|-----------------------|----------------------------|--------------------------|-----------------------------------------|-------------------------|-------------|-------------|-------------|
| <i>Bacteria</i> | <i>Proteobacteria</i> | <i>Gammaproteobacteria</i> | <i>Cardiobacteriales</i> | <i>Cardiobacteriaceae</i>               | <i>Suttonella</i>       | 0           | 3,70778E-06 | 0,037588881 |
| <i>Bacteria</i> | <i>Synergistetes</i>  | <i>Synergistia</i>         | <i>Synergistales</i>     | <i>Synergistaceae</i>                   | <i>Synergistes</i>      | 2,16189E-05 | 2,45508E-05 | 0,881930721 |
| <i>Bacteria</i> | <i>Firmicutes</i>     | <i>Clostridia</i>          | <i>Clostridiales</i>     | <i>Lachnospiraceae</i>                  | <i>Syntrophococcus</i>  | 6,80546E-06 | 6,51954E-06 | 0,457717434 |
| <i>Bacteria</i> | <i>Bacteroidetes</i>  | <i>Bacteroidia</i>         | <i>Bacteroidales</i>     | <i>Porphyromonadaceae</i>               | <i>Tannerella</i>       | 6,61888E-05 | 0,000151869 | 0,816315804 |
| <i>Bacteria</i> | <i>Proteobacteria</i> | <i>Betaproteobacteria</i>  | <i>Burkholderiales</i>   | <i>Burkholderiales_incertae_sedis</i>   | <i>Tepidimonas</i>      | 4,01889E-05 | 0           | 0,047105791 |
| <i>Bacteria</i> | <i>Actinobacteria</i> | <i>Actinobacteria</i>      | <i>Actinomycetales</i>   | <i>Propionibacteriaceae</i>             | <i>Tessaracoccus</i>    | 1,10684E-05 | 0,000240535 | 0,298500252 |
| <i>Bacteria</i> | <i>Firmicutes</i>     | <i>Bacilli</i>             | <i>Lactobacillales</i>   | <i>Enterococcaceae</i>                  | <i>Tetragenococcus</i>  | 0           | 3,0307E-06  | 0,082355525 |
| <i>Bacteria</i> | <i>Proteobacteria</i> | <i>Gammaproteobacteria</i> | <i>Oceanospirillales</i> | <i>Oceanospirillaceae</i>               | <i>Thalassolituus</i>   | 3,98011E-06 | 0           | 0,285049407 |
| <i>Bacteria</i> | <i>Proteobacteria</i> | <i>Betaproteobacteria</i>  | <i>Rhodocyclales</i>     | <i>Rhodocyclaceae</i>                   | <i>Thauera</i>          | 2,38806E-06 | 5,99838E-07 | 0,844911363 |
| <i>Bacteria</i> | <i>Firmicutes</i>     | <i>Bacilli</i>             | <i>Bacillales</i>        | <i>Bacillales_Incertae_Sedis_X</i>      | <i>Thermicanus</i>      | 8,62024E-06 | 0           | 0,285049407 |
| <i>Archaea</i>  | <i>Euryarchaeota</i>  | <i>Thermoplasmata</i>      | <i>Thermoplasmatales</i> | <i>Thermoplasmatales_incertae_sedis</i> | <i>Thermogymnomonas</i> | 9,75978E-06 | 1,63439E-05 | 0,679325522 |
| <i>Bacteria</i> | <i>Actinobacteria</i> | <i>Thermoleophilia</i>     | <i>Thermoleophilales</i> | <i>Thermoleophilaceae</i>               | <i>Thermoleophilum</i>  | 1,28116E-05 | 0           | 0,285049407 |
| <i>Bacteria</i> | <i>Proteobacteria</i> | <i>Gammaproteobacteria</i> | <i>Xanthomonadales</i>   | <i>Xanthomonadaceae</i>                 | <i>Thermomonas</i>      | 1,07118E-05 | 0           | 0,047105791 |
| <i>Bacteria</i> | <i>Proteobacteria</i> | <i>Gammaproteobacteria</i> | <i>Thiotrichales</i>     | <i>Thiotrichaceae</i>                   | <i>Thiothrix</i>        | 0           | 7,7979E-06  | 0,349574806 |
| <i>Bacteria</i> | <i>Firmicutes</i>     | <i>Clostridia</i>          | <i>Clostridiales</i>     | <i>Clostridiales_Incertae_Sedis_XI</i>  | <i>Tissierella</i>      | 3,08859E-05 | 2,39935E-06 | 0,137485208 |
| <i>Bacteria</i> | <i>Proteobacteria</i> | <i>Gammaproteobacteria</i> | <i>Aeromonadales</i>     | <i>Aeromonadaceae</i>                   | <i>Tolumonas</i>        | 0,000000199 | 4,73698E-07 | 1           |
| <i>Bacteria</i> | <i>Actinobacteria</i> | <i>Actinobacteria</i>      | <i>Actinomycetales</i>   | <i>Corynebacterineae_incertae_sedis</i> | <i>Tomitella</i>        | 2,72976E-06 | 0           | 0,047105791 |
| <i>Bacteria</i> | <i>Spirochaetes</i>   | <i>Spirochaetia</i>        | <i>Spirochaetales</i>    | <i>Spirochaetaceae</i>                  | <i>Treponema</i>        | 0,000471774 | 0,026672722 | 0,105192505 |

|                 |                            |                            |                           |                            |                      |             |             |             |
|-----------------|----------------------------|----------------------------|---------------------------|----------------------------|----------------------|-------------|-------------|-------------|
| <i>Bacteria</i> | <i>Firmicutes</i>          | <i>Bacilli</i>             | <i>Lactobacillales</i>    | <i>Carnobacteriaceae</i>   | <i>Trichococcus</i>  | 0,000195363 | 0,000035615 | 0,188593442 |
| <i>Bacteria</i> | <i>Deinococcus-Thermus</i> | <i>Deinococci</i>          | <i>Deinococcales</i>      | <i>Trueperaceae</i>        | <i>Truepera</i>      | 8,62024E-06 | 0           | 0,285049407 |
| <i>Bacteria</i> | <i>Actinobacteria</i>      | <i>Actinobacteria</i>      | <i>Actinomycetales</i>    | <i>Actinomycetaceae</i>    | <i>Trueperella</i>   | 0           | 5,92295E-05 | 0,037588881 |
| <i>Bacteria</i> | <i>Actinobacteria</i>      | <i>Actinobacteria</i>      | <i>Actinomycetales</i>    | <i>Corynebacteriaceae</i>  | <i>Turicella</i>     | 1,33769E-06 | 0,000009808 | 0,191694602 |
| <i>Bacteria</i> | <i>Firmicutes</i>          | <i>Erysipelotrichia</i>    | <i>Erysipelotrichales</i> | <i>Erysipelotrichaceae</i> | <i>Turicibacter</i>  | 5,83048E-05 | 0,000405155 | 0,027750993 |
| <i>Bacteria</i> | <i>Proteobacteria</i>      | <i>Betaproteobacteria</i>  | <i>Burkholderiales</i>    | <i>Oxalobacteraceae</i>    | <i>Undibacterium</i> | 0,000635577 | 5,84609E-06 | 0,000967429 |
| <i>Bacteria</i> | <i>Firmicutes</i>          | <i>Bacilli</i>             | <i>Bacillales</i>         | <i>Planococcaceae</i>      | <i>Ureibacillus</i>  | 0           | 8,84352E-07 | 0,349574806 |
| <i>Bacteria</i> | <i>Proteobacteria</i>      | <i>Betaproteobacteria</i>  | <i>Neisseriales</i>       | <i>Neisseriaceae</i>       | <i>Uruburuella</i>   | 1,0986E-06  | 2,84706E-05 | 0,315285648 |
| <i>Bacteria</i> | <i>Firmicutes</i>          | <i>Bacilli</i>             | <i>Lactobacillales</i>    | <i>Enterococcaceae</i>     | <i>Vagococcus</i>    | 0,000100959 | 5,82023E-05 | 0,902908911 |
| <i>Bacteria</i> | <i>Proteobacteria</i>      | <i>Deltaproteobacteria</i> | <i>Bdellovibrionales</i>  | <i>Bdellovibrionaceae</i>  | <i>Vampirovibrio</i> | 0,000189007 | 0,000498828 | 0,027890529 |
| <i>Bacteria</i> | <i>Proteobacteria</i>      | <i>Betaproteobacteria</i>  | <i>Burkholderiales</i>    | <i>Comamonadaceae</i>      | <i>Variovorax</i>    | 2,18906E-06 | 1,47947E-06 | 0,844911363 |
| <i>Bacteria</i> | <i>Firmicutes</i>          | <i>Negativicutes</i>       | <i>Selenomonadales</i>    | <i>Veillonellaceae</i>     | <i>Veillonella</i>   | 0,000106465 | 0,000252748 | 0,131079232 |
| <i>Bacteria</i> | <i>Proteobacteria</i>      | <i>Gammaproteobacteria</i> | <i>Vibrionales</i>        | <i>Vibrionaceae</i>        | <i>Vibrio</i>        | 0,000148541 | 6,3144E-06  | 0,945071382 |
| <i>Bacteria</i> | <i>Lentisphaerae</i>       | <i>Lentisphaeria</i>       | <i>Victivallales</i>      | <i>Victivallaceae</i>      | <i>Victivallis</i>   | 0,00000911  | 3,94448E-05 | 0,089648055 |
| <i>Bacteria</i> | <i>Proteobacteria</i>      | <i>Betaproteobacteria</i>  | <i>Neisseriales</i>       | <i>Neisseriaceae</i>       | <i>Vitreoscilla</i>  | 3,83586E-05 | 5,08825E-06 | 0,79400268  |
| <i>Bacteria</i> | <i>Bacteroidetes</i>       | <i>Flavobacteriia</i>      | <i>Flavobacteriales</i>   | <i>Flavobacteriaceae</i>   | <i>Wautersiella</i>  | 0,001665323 | 4,82547E-05 | 0,11277615  |
| <i>Bacteria</i> | <i>Bacteroidetes</i>       | <i>Flavobacteriia</i>      | <i>Flavobacteriales</i>   | <i>Flavobacteriaceae</i>   | <i>Weeksella</i>     | 4,81318E-05 | 0           | 0,047105791 |
| <i>Bacteria</i> | <i>Firmicutes</i>          | <i>Bacilli</i>             | <i>Lactobacillales</i>    | <i>Leuconostocaceae</i>    | <i>Weissella</i>     | 0,001485887 | 0,000340158 | 0,164537456 |

|                 |                       |                              |                          |                           |                         |             |                 |                 |
|-----------------|-----------------------|------------------------------|--------------------------|---------------------------|-------------------------|-------------|-----------------|-----------------|
| <i>Bacteria</i> | <i>Actinobacteria</i> | <i>Actinobacteria</i>        | <i>Actinomycetales</i>   | <i>Nocardiaceae</i>       | <i>Williamsia</i>       | 0,000000862 | 0               | 0,28504<br>9407 |
| <i>Bacteria</i> | <i>Proteobacteria</i> | <i>Gammaproteobacteria</i>   | <i>Xanthomonadales</i>   | <i>Xanthomonadaceae</i>   | <i>Wohlfahrtiimonas</i> | 0,000629628 | 7,1974E-06      | 0,60150<br>8134 |
| <i>Bacteria</i> | <i>Proteobacteria</i> | <i>Epsilonproteobacteria</i> | <i>Campylobacterales</i> | <i>Helicobacteraceae</i>  | <i>Wolinella</i>        | 0           | 2,21088E-06     | 0,34957<br>4806 |
| <i>Bacteria</i> | <i>Proteobacteria</i> | <i>Gammaproteobacteria</i>   | <i>Xanthomonadales</i>   | <i>Xanthomonadaceae</i>   | <i>Xanthomonas</i>      | 1,92173E-05 | 0               | 0,28504<br>9407 |
| <i>Bacteria</i> | <i>Bacteroidetes</i>  | <i>Bacteroidia</i>           | <i>Bacteroidales</i>     | <i>Prevotellaceae</i>     | <i>Xylanibacter</i>     | 0           | 2,31948E-05     | 0,01589<br>1197 |
| <i>Bacteria</i> | <i>Proteobacteria</i> | <i>Gammaproteobacteria</i>   | <i>Xanthomonadales</i>   | <i>Xanthomonadaceae</i>   | <i>Xylella</i>          | 1,50043E-06 | 0               | 0,11760<br>1295 |
| <i>Bacteria</i> | <i>Actinobacteria</i> | <i>Actinobacteria</i>        | <i>Actinomycetales</i>   | <i>Micrococcaceae</i>     | <i>Yaniella</i>         | 5,61024E-06 | 5,69846E-06     | 0,56254<br>8843 |
| <i>Bacteria</i> | <i>Proteobacteria</i> | <i>Gammaproteobacteria</i>   | <i>Enterobacteriales</i> | <i>Enterobacteriaceae</i> | <i>Yokenella</i>        | 0           | 2,6946E-06      | 0,17090<br>352  |
| <i>Bacteria</i> | <i>Proteobacteria</i> | <i>Gammaproteobacteria</i>   | <i>Aeromonadales</i>     | <i>Aeromonadaceae</i>     | <i>Zobellella</i>       | 1,57214E-05 | 0               | 0,28504<br>9407 |
| <i>Bacteria</i> | <i>Proteobacteria</i> | <i>Betaproteobacteria</i>    | <i>Rhodocyclales</i>     | <i>Rhodocyclaceae</i>     | <i>Zoogloea</i>         | 0           | 0,0000035<br>99 | 0,34957<br>4806 |

**Additional file 1B. Frequencies of OTUs assigned at genus level from farm MC at the two sampling times (MC1 and MC2).**

| Domain   | Phylum         | Class               | Order            | Family                           | Genus               | Frequency   |             | FDR_P    |
|----------|----------------|---------------------|------------------|----------------------------------|---------------------|-------------|-------------|----------|
|          |                |                     |                  |                                  |                     | MC1         | MC2         |          |
| Bacteria | Firmicutes     | Bacilli             | Lactobacillales  | Aerococcaceae                    | Abiotrophia         | 3,85279E-06 | 0           | 0,240955 |
| Bacteria | Firmicutes     | Clostridia          | Clostridiales    | Ruminococcaceae                  | Acetanaerobacterium | 0,000249138 | 0,001487629 | 0,003837 |
| Bacteria | Firmicutes     | Clostridia          | Clostridiales    | Lachnospiraceae                  | Acetitamaculum      | 3,86726E-05 | 2,52909E-06 | 0,562711 |
| Bacteria | Firmicutes     | Clostridia          | Clostridiales    | Ruminococcaceae                  | Acetivibrio         | 8,99057E-05 | 9,32725E-05 | 0,559796 |
| Bacteria | Firmicutes     | Clostridia          | Clostridiales    | Peptostreptococcaceae            | Acetoanaerobium     | 0           | 0,000042065 | 0,393769 |
| Bacteria | Proteobacteria | Alphaproteobacteria | Rhodospirillales | Acetobacteraceae                 | Acetobacter         | 0           | 4,22886E-07 | 0,393769 |
| Bacteria | Proteobacteria | Betaproteobacteria  | Burkholderiales  | Alcaligenaceae                   | Achromobacter       | 0           | 1,16274E-05 | 0,215311 |
| Bacteria | Firmicutes     | Clostridia          | Clostridiales    | Clostridiales_Incertae_Sedis_XII | Acidaminobacter     | 0           | 0,00000021  | 0,393769 |
| Bacteria | Firmicutes     | Negativicutes       | Selenomonadales  | Acidaminococcaceae               | Acidaminococcus     | 0,000048249 | 0,00179064  | 0,002533 |
| Bacteria | Proteobacteria | Betaproteobacteria  | Burkholderiales  | Comamonadaceae                   | Acidovorax          | 5,40671E-06 | 9,82409E-06 | 0,745201 |
| Bacteria | Proteobacteria | Gammaproteobacteria | Pseudomonadales  | Moraxellaceae                    | Acinetobacter       | 0,002451465 | 0,003426505 | 0,08278  |
| Bacteria | Proteobacteria | Gammaproteobacteria | Pasteurellales   | Pasteurellaceae                  | Actinobacillus      | 0,010895738 | 0,023693333 | 0,1372   |
| Bacteria | Actinobacteria | Actinobacteria      | Actinomycetales  | Actinomycetaceae                 | Actinobaculum       | 2,16269E-06 | 0           | 0,240955 |
| Bacteria | Actinobacteria | Actinobacteria      | Actinomycetales  | Actinomycetaceae                 | Actinomyces         | 1,82398E-05 | 1,21859E-05 | 0,256447 |
| Bacteria | Actinobacteria | Actinobacteria      | Actinomycetales  | Pseudonocardiaceae               | Actinomycetospora   | 9,84399E-07 | 0           | 0,240955 |
| Bacteria | Actinobacteria | Actinobacteria      | Coriobacteriales | Coriobacteriaceae                | Adlercreutzia       | 0           | 0,00000021  | 0,393769 |
| Bacteria | Proteobacteria | Betaproteobacteria  | Burkholderiales  | Alcaligenaceae                   | Advenella           | 8,62305E-05 | 1,29879E-05 | 0,920279 |

|                 |                        |                            |                           |                            |                           |                 |                 |          |
|-----------------|------------------------|----------------------------|---------------------------|----------------------------|---------------------------|-----------------|-----------------|----------|
| <i>Bacteria</i> | <i>Firmicutes</i>      | <i>Bacilli</i>             | <i>Lactobacillales</i>    | <i>Aerococcaceae</i>       | <i>Aerococcus</i>         | 0,00083018<br>1 | 0,00128<br>4797 | 0,317468 |
| <i>Bacteria</i> | <i>Actinobacteria</i>  | <i>Actinobacteria</i>      | <i>Actinomycetales</i>    | <i>Nocardioideaceae</i>    | <i>Aeromicrobium</i>      | 0               | 0,00000<br>3486 | 0,393769 |
| <i>Bacteria</i> | <i>Proteobacteria</i>  | <i>Gammaproteobacteria</i> | <i>Aeromonadales</i>      | <i>Aeromonadaceae</i>      | <i>Aeromonas</i>          | 0,00023934      | 3,85947<br>E-05 | 0,020263 |
| <i>Bacteria</i> | <i>Proteobacteria</i>  | <i>Alphaproteobacteria</i> | <i>Rhizobiales</i>        | <i>Bradyrhizobiaceae</i>   | <i>Afipia</i>             | 4,40319E-06     | 0,01089<br>3441 | 0,000517 |
| <i>Bacteria</i> | <i>Actinobacteria</i>  | <i>Actinobacteria</i>      | <i>Actinomycetales</i>    | <i>Microbacteriaceae</i>   | <i>Agrococcus</i>         | 3,95305E-06     | 1,25915<br>E-05 | 0,831292 |
| <i>Bacteria</i> | <i>Verrucomicrobia</i> | <i>Verrucomicrobiae</i>    | <i>Verrucomicrobiales</i> | <i>Verrucomicrobiaceae</i> | <i>Akkermansia</i>        | 0,00052948<br>7 | 0,00053<br>9944 | 0,057543 |
| <i>Bacteria</i> | <i>Proteobacteria</i>  | <i>Betaproteobacteria</i>  | <i>Burkholderiales</i>    | <i>Alcaligenaceae</i>      | <i>Alcaligenes</i>        | 1,88601E-05     | 5,39894<br>E-06 | 0,562711 |
| <i>Bacteria</i> | <i>Bacteroidetes</i>   | <i>Bacteroidia</i>         | <i>Bacteroidales</i>      | <i>Rikenellaceae</i>       | <i>Alistipes</i>          | 0,01242031      | 0,00005<br>8865 | 0,000247 |
| <i>Bacteria</i> | <i>Firmicutes</i>      | <i>Clostridia</i>          | <i>Clostridiales</i>      | <i>Eubacteriaceae</i>      | <i>Alkalibacter</i>       | 6,60944E-05     | 0               | 0,240955 |
| <i>Bacteria</i> | <i>Bacteroidetes</i>   | <i>Bacteroidia</i>         | <i>Bacteroidales</i>      | <i>Marinilabiliaceae</i>   | <i>Alkalitalea</i>        | 0               | 1,86309<br>E-06 | 0,215311 |
| <i>Bacteria</i> | <i>Proteobacteria</i>  | <i>Gammaproteobacteria</i> | <i>Pseudomonadales</i>    | <i>Moraxellaceae</i>       | <i>Alkanindiges</i>       | 0,00009840<br>4 | 2,19089<br>E-07 | 0,009265 |
| <i>Bacteria</i> | <i>Firmicutes</i>      | <i>Negativicutes</i>       | <i>Selenomonadales</i>    | <i>Veillonellaceae</i>     | <i>Allisonella</i>        | 3,13748E-05     | 0,00035<br>201  | 0,027385 |
| <i>Bacteria</i> | <i>Firmicutes</i>      | <i>Erysipelotrichia</i>    | <i>Erysipelotrichales</i> | <i>Erysipelotrichaceae</i> | <i>Allobaculum</i>        | 0,00005647<br>6 | 3,68379<br>E-07 | 0,009265 |
| <i>Bacteria</i> | <i>Firmicutes</i>      | <i>Bacilli</i>             | <i>Lactobacillales</i>    | <i>Carnobacteriaceae</i>   | <i>Alloiococcus</i>       | 6,65059E-06     | 6,34329<br>E-07 | 0,756733 |
| <i>Bacteria</i> | <i>Bacteroidetes</i>   | <i>Bacteroidia</i>         | <i>Bacteroidales</i>      | <i>Prevotellaceae</i>      | <i>Alloprevotella</i>     | 0,00444088<br>1 | 0,01635<br>263  | 0,020776 |
| <i>Bacteria</i> | <i>Proteobacteria</i>  | <i>Alphaproteobacteria</i> | <i>Sphingomonadales</i>   | <i>Erythrobacteraceae</i>  | <i>Altererythrobacter</i> | 1,94395E-05     | 0               | 0,240955 |
| <i>Bacteria</i> | <i>Proteobacteria</i>  | <i>Betaproteobacteria</i>  | <i>Neisseriales</i>       | <i>Neisseriaceae</i>       | <i>Alysiella</i>          | 1,46111E-05     | 3,68014<br>E-05 | 0,76399  |
| <i>Bacteria</i> | <i>Firmicutes</i>      | <i>Clostridia</i>          | <i>Clostridiales</i>      | <i>Clostridiaceae 1</i>    | <i>Anaerobacter</i>       | 4,93842E-06     | 3,23939<br>E-05 | 0,010059 |
| <i>Bacteria</i> | <i>Proteobacteria</i>  | <i>Gammaproteobacteria</i> | <i>Aeromonadales</i>      | <i>Succinivibrionaceae</i> | <i>Anaerobiospirillum</i> | 0,00011570<br>5 | 1,97484<br>E-05 | 0,920279 |

|                 |                       |                              |                          |                                          |                          |             |             |          |
|-----------------|-----------------------|------------------------------|--------------------------|------------------------------------------|--------------------------|-------------|-------------|----------|
| <i>Bacteria</i> | <i>Firmicutes</i>     | <i>Clostridia</i>            | <i>Clostridiales</i>     | <i>Clostridiales_Incertae Sedis XI</i>   | <i>Anaerococcus</i>      | 0,000733188 | 1,45974E-05 | 0,001292 |
| <i>Bacteria</i> | <i>Firmicutes</i>     | <i>Clostridia</i>            | <i>Clostridiales</i>     | <i>Ruminococcaceae</i>                   | <i>Anaerofilum</i>       | 1,55813E-05 | 1,81807E-05 | 0,35801  |
| <i>Bacteria</i> | <i>Firmicutes</i>     | <i>Clostridia</i>            | <i>Clostridiales</i>     | <i>Eubacteriaceae</i>                    | <i>Anaerofustis</i>      | 0           | 2,20888E-05 | 0,063994 |
| <i>Bacteria</i> | <i>Firmicutes</i>     | <i>Negativicutes</i>         | <i>Selenomonadales</i>   | <i>Veillonellaceae</i>                   | <i>Anaeroglobus</i>      | 0           | 8,28228E-06 | 0,063994 |
| <i>Bacteria</i> | <i>Bacteroidetes</i>  | <i>Bacteroidia</i>           | <i>Bacteroidales</i>     | <i>Marinilabiaceae</i>                   | <i>Anaerophaga</i>       | 0,000416787 | 0,00383883  | 0,038989 |
| <i>Bacteria</i> | <i>Tenericutes</i>    | <i>Mollicutes</i>            | <i>Anaeroplasmatales</i> | <i>Anaeroplasmataceae</i>                | <i>Anaeroplasma</i>      | 0,001608723 | 0,000501912 | 0,006432 |
| <i>Bacteria</i> | <i>Bacteroidetes</i>  | <i>Bacteroidia</i>           | <i>Bacteroidales</i>     | <i>Bacteroidaceae</i>                    | <i>Anaerorhabdus</i>     | 0           | 0,000019079 | 0,063994 |
| <i>Bacteria</i> | <i>Firmicutes</i>     | <i>Negativicutes</i>         | <i>Selenomonadales</i>   | <i>Veillonellaceae</i>                   | <i>Anaerosinus</i>       | 0           | 5,22264E-05 | 0,393769 |
| <i>Bacteria</i> | <i>Firmicutes</i>     | <i>Clostridia</i>            | <i>Clostridiales</i>     | <i>Incertae Sedis XI</i>                 | <i>Anaerosphaera</i>     | 0           | 1,59314E-06 | 0,393769 |
| <i>Bacteria</i> | <i>Firmicutes</i>     | <i>Clostridia</i>            | <i>Clostridiales</i>     | <i>Clostridiaceae 1</i>                  | <i>Anaerosporobacter</i> | 0,000269978 | 2,90102E-05 | 0,080216 |
| <i>Bacteria</i> | <i>Firmicutes</i>     | <i>Clostridia</i>            | <i>Clostridiales</i>     | <i>Lachnospiraceae</i>                   | <i>Anaerostipes</i>      | 7,86722E-05 | 6,79029E-05 | 0,1625   |
| <i>Bacteria</i> | <i>Firmicutes</i>     | <i>Clostridia</i>            | <i>Clostridiales</i>     | <i>Ruminococcaceae</i>                   | <i>Anaerotruncus</i>     | 6,22565E-05 | 3,36816E-05 | 0,617189 |
| <i>Bacteria</i> | <i>Firmicutes</i>     | <i>Negativicutes</i>         | <i>Selenomonadales</i>   | <i>Veillonellaceae</i>                   | <i>Anaerovibrio</i>      | 0,00047358  | 0,010889484 | 0,010475 |
| <i>Bacteria</i> | <i>Firmicutes</i>     | <i>Clostridia</i>            | <i>Clostridiales</i>     | <i>Clostridiales_Incertae Sedis XIII</i> | <i>Anaerovorax</i>       | 8,78456E-05 | 0,000524325 | 0,002209 |
| <i>Bacteria</i> | <i>Firmicutes</i>     | <i>Bacilli</i>               | <i>Bacillales</i>        | <i>Bacillaceae 1</i>                     | <i>Anoxybacillus</i>     | 0,000013964 | 2,91599E-05 | 0,831292 |
| <i>Bacteria</i> | <i>Proteobacteria</i> | <i>Betaproteobacteria</i>    | <i>Burkholderiales</i>   | <i>Burkholderiales_incertae_sedis</i>    | <i>Aquabacterium</i>     | 0,000004388 | 0,000022529 | 0,417741 |
| <i>Bacteria</i> | <i>Actinobacteria</i> | <i>Actinobacteria</i>        | <i>Actinomycetales</i>   | <i>Actinomycetaceae</i>                  | <i>Arcanobacterium</i>   | 9,85273E-06 | 4,87782E-06 | 0,728372 |
| <i>Bacteria</i> | <i>Proteobacteria</i> | <i>Epsilonproteobacteria</i> | <i>Campylobacterales</i> | <i>Campylobacteraceae</i>                | <i>Arcobacter</i>        | 7,81105E-05 | 0,000147272 | 0,41505  |

|          |                           |                     |                     |                     |                     |                 |                 |          |
|----------|---------------------------|---------------------|---------------------|---------------------|---------------------|-----------------|-----------------|----------|
| Bacteria | Bacteroidetes             | Sphingobacteriia    | Sphingobacteriales  | Sphingobacteriaceae | Arcticibacter       | 0               | 8,76225<br>E-06 | 0,393769 |
| Bacteria | Armatimonadetes           | Armatimonadetes_gp5 | Armatimonadetes_gp5 | Armatimonadetes_gp5 | Armatimonadetes_gp5 | 0               | 3,97513<br>E-05 | 0,393769 |
| Bacteria | Actinobacteria            | Actinobacteria      | Actinomycetales     | Micrococcaceae      | Arthrobacter        | 0,00040690<br>1 | 0,00157<br>1564 | 0,185676 |
| Bacteria | Tenericutes               | Mollicutes          | Anaeroplasmatales   | Anaeroplasmataceae  | Asteroleplasma      | 8,72316E-05     | 0,00054<br>7879 | 0,013355 |
| Bacteria | Proteobacteria            | Alphaproteobacteria | Caulobacterales     | Caulobacteraceae    | Asticcacaulis       | 0               | 1,68658<br>E-06 | 0,11879  |
| Bacteria | Firmicutes                | Bacilli             | Lactobacillales     | Carnobacteriaceae   | Atopobacter         | 6,18883E-06     | 0,00000<br>8138 | 0,73845  |
| Bacteria | Actinobacteria            | Actinobacteria      | Coriobacteriales    | Coriobacteriaceae   | Atopobium           | 4,43372E-06     | 5,80171<br>E-07 | 0,756733 |
| Bacteria | Firmicutes                | Bacilli             | Lactobacillales     | Carnobacteriaceae   | Atopostipes         | 1,67642E-05     | 1,79473<br>E-05 | 0,816905 |
| Bacteria | Proteobacteria            | Alphaproteobacteria | Rhizobiales         | Aurantimonadaceae   | Aurantimonas        | 3,05164E-05     | 0               | 0,240955 |
| Bacteria | Proteobacteria            | Gammaproteobacteria | Pseudomonadales     | Pseudomonadaceae    | Azorhizophilus      | 1,9688E-06      | 0               | 0,240955 |
| Bacteria | Proteobacteria            | Betaproteobacteria  | Rhodocyclales       | Rhodocyclaceae      | Azospira            | 0               | 1,89794<br>E-05 | 0,393769 |
| Bacteria | Cyanobacteria/Chloroplast | Chloroplast         | Chloroplast         | Chloroplast         | Bacillariophyta     | 8,55676E-05     | 0               | 0,240955 |
| Bacteria | Firmicutes                | Bacilli             | Bacillales          | Bacillaceae 1       | Bacillus            | 8,69667E-05     | 0,00033<br>6086 | 0,619679 |
| Bacteria | Bacteroidetes             | Bacteroidia         | Bacteroidales       | Bacteroidaceae      | Bacteroides         | 0,01694078<br>3 | 0,00365<br>948  | 0,00028  |
| Bacteria | Bacteroidetes             | Bacteroidia         | Bacteroidales       | Porphyromonadaceae  | Barnesiella         | 0,01159725<br>1 | 0,02524<br>7799 | 0,1604   |
| Bacteria | Proteobacteria            | Alphaproteobacteria | Rhodospirillales    | Acetobacteraceae    | Belnapia            | 9,35678E-06     | 0               | 0,240955 |
| Bacteria | Proteobacteria            | Betaproteobacteria  | Neisseriales        | Neisseriaceae       | Bergeriella         | 2,9548E-06      | 1,30433<br>E-06 | 0,311555 |
| Bacteria | Bacteroidetes             | Flavobacteriia      | Flavobacteriales    | Flavobacteriaceae   | Bergeyella          | 0,08204834<br>9 | 9,96825<br>E-05 | 0,00028  |
| Bacteria | Firmicutes                | Bacilli             | Bacillales          | Planococcaceae      | Bhargavaea          | 1,21088E-05     | 0               | 0,240955 |
| Bacteria | Proteobacteria            | Gammaproteobacteria | Pasteurellales      | Pasteurellaceae     | Bibersteinia        | 1,75521E-05     | 0,00000<br>2198 | 0,845405 |



|                 |                       |                            |                           |                             |                        |                 |                 |          |
|-----------------|-----------------------|----------------------------|---------------------------|-----------------------------|------------------------|-----------------|-----------------|----------|
| <i>Bacteria</i> | <i>Actinobacteria</i> | <i>Actinobacteria</i>      | <i>Bifidobacteriales</i>  | <i>Bifidobacteriaceae</i>   | <i>Bifidobacterium</i> | 4,24439E-05     | 1,06659<br>E-05 | 0,08074  |
| <i>Bacteria</i> | <i>Proteobacteria</i> | <i>Deltaproteobacteria</i> | <i>Desulfovibrionales</i> | <i>Desulfovibrionaceae</i>  | <i>Bilophila</i>       | 9,76043E-06     | 0,00012<br>0605 | 0,003989 |
| <i>Bacteria</i> | <i>Proteobacteria</i> | <i>Alphaproteobacteria</i> | <i>Sphingomonadales</i>   | <i>Sphingomonadaceae</i>    | <i>Blastomonas</i>     | 0               | 2,11443<br>E-07 | 0,393769 |
| <i>Bacteria</i> | <i>Planctomycetes</i> | <i>Planctomycetia</i>      | <i>Planctomycetales</i>   | <i>Planctomycetaceae</i>    | <i>Blastopirellula</i> | 0               | 1,00017<br>E-06 | 0,215311 |
| <i>Bacteria</i> | <i>Firmicutes</i>     | <i>Clostridia</i>          | <i>Clostridiales</i>      | <i>Lachnospiraceae</i>      | <i>Blautia</i>         | 0,00081709<br>3 | 0,00341<br>5115 | 0,010475 |
| <i>Bacteria</i> | <i>Proteobacteria</i> | <i>Betaproteobacteria</i>  | <i>Burkholderiales</i>    | <i>Alcaligenaceae</i>       | <i>Bordetella</i>      | 0,00110476<br>5 | 7,7467E<br>-07  | 8,54E-05 |
| <i>Bacteria</i> | <i>Proteobacteria</i> | <i>Alphaproteobacteria</i> | <i>Rhizobiales</i>        | <i>Bradyrhizobiaceae</i>    | <i>Bosea</i>           | 0               | 0,01152<br>507  | 0,00048  |
| <i>Bacteria</i> | <i>Actinobacteria</i> | <i>Actinobacteria</i>      | <i>Actinomycetales</i>    | <i>Dermabacteraceae</i>     | <i>Brachybacterium</i> | 7,04411E-05     | 0,00024<br>7076 | 0,731467 |
| <i>Bacteria</i> | <i>Proteobacteria</i> | <i>Betaproteobacteria</i>  | <i>Burkholderiales</i>    | <i>Comamonadaceae</i>       | <i>Brachymonas</i>     | 6,43141E-05     | 0,00000<br>1526 | 0,071628 |
| <i>Bacteria</i> | <i>Spirochaetes</i>   | <i>Spirochaetia</i>        | <i>Spirochaetales</i>     | <i>Brachyspiraceae</i>      | <i>Brachyspira</i>     | 0               | 2,75573<br>E-05 | 0,215311 |
| <i>Bacteria</i> | <i>Proteobacteria</i> | <i>Alphaproteobacteria</i> | <i>Rhizobiales</i>        | <i>Bradyrhizobiaceae</i>    | <i>Bradyrhizobium</i>  | 0               | 0,00047<br>1333 | 0,016307 |
| <i>Bacteria</i> | <i>Actinobacteria</i> | <i>Actinobacteria</i>      | <i>Actinomycetales</i>    | <i>Brevibacteriaceae</i>    | <i>Brevibacterium</i>  | 0,00010057<br>2 | 0,00013<br>6009 | 0,044667 |
| <i>Bacteria</i> | <i>Proteobacteria</i> | <i>Alphaproteobacteria</i> | <i>Caulobacterales</i>    | <i>Caulobacteraceae</i>     | <i>Brevundimonas</i>   | 0,00063608<br>4 | 9,65301<br>E-05 | 0,001072 |
| <i>Bacteria</i> | <i>Firmicutes</i>     | <i>Bacilli</i>             | <i>Bacillales</i>         | <i>Listeriaceae</i>         | <i>Brochothrix</i>     | 3,87837E-05     | 0               | 0,088427 |
| <i>Bacteria</i> | <i>Actinobacteria</i> | <i>Actinobacteria</i>      | <i>Actinomycetales</i>    | <i>Propionibacteriaceae</i> | <i>Brooklawnia</i>     | 3,65668E-05     | 0               | 0,240955 |
| <i>Bacteria</i> | <i>Proteobacteria</i> | <i>Alphaproteobacteria</i> | <i>Rhizobiales</i>        | <i>Brucellaceae</i>         | <i>Brucella</i>        | 3,57634E-06     | 0               | 0,088427 |
| <i>Bacteria</i> | <i>Firmicutes</i>     | <i>Erysipelotrichia</i>    | <i>Erysipelotrichales</i> | <i>Erysipelotrichaceae</i>  | <i>Bulleidia</i>       | 0,00009228<br>8 | 0,00131<br>4834 | 0,001671 |
| <i>Bacteria</i> | <i>Proteobacteria</i> | <i>Gammaproteobacteria</i> | <i>Enterobacteriales</i>  | <i>Enterobacteriaceae</i>   | <i>Buttiauxella</i>    | 0,00001958<br>7 | 0               | 0,088427 |
| <i>Bacteria</i> | <i>Firmicutes</i>     | <i>Clostridia</i>          | <i>Clostridiales</i>      | <i>Ruminococcaceae</i>      | <i>Butyricoccus</i>    | 0,00097988<br>3 | 0,00150<br>5645 | 1        |
| <i>Bacteria</i> | <i>Bacteroidetes</i>  | <i>Bacteroidia</i>         | <i>Bacteroidales</i>      | <i>Porphyromonadaceae</i>   | <i>Butyricimonas</i>   | 2,63269E-05     | 6,39855<br>E-05 | 0,081566 |

|          |                |                       |                       |                       |                       |                 |                 |          |
|----------|----------------|-----------------------|-----------------------|-----------------------|-----------------------|-----------------|-----------------|----------|
| Bacteria | Firmicutes     | Clostridia            | Clostridiales         | Lachnospiraceae       | Butyrivibrio          | 5,9064E-06      | 0,00018<br>0965 | 0,062837 |
| Bacteria | Chloroflexi    | Caldilineae           | Caldilineales         | Caldilineaceae        | Caldilinea            | 0               | 2,1037E<br>-06  | 0,393769 |
| Bacteria | Proteobacteria | Alphaproteobacteria   | Rhizobiales           | Beijerinckiaceae      | Camelimonas           | 0               | 0,00000<br>8134 | 0,393769 |
| Bacteria | Proteobacteria | Epsilonproteobacteria | Campylobacterales     | Campylobacteraceae    | Campylobacter         | 0,00030400<br>1 | 0,02882<br>6866 | 0,000937 |
| Bacteria | Proteobacteria | Gammaproteobacteria   | Candidatus Carsonella | Candidatus Carsonella | Candidatus Carsonella | 0,00005552<br>3 | 0               | 0,00024  |
| Bacteria | Bacteroidetes  | Flavobacteriia        | Flavobacteriales      | Flavobacteriaceae     | Capnocytophaga        | 0,00024474<br>8 | 1,84189<br>E-07 | 0,000478 |
| Bacteria | Firmicutes     | Bacilli               | Lactobacillales       | Carnobacteriaceae     | Carnobacterium        | 3,90115E-05     | 2,11443<br>E-07 | 0,033134 |
| Bacteria | Firmicutes     | Bacilli               | Bacillales            | Planococcaceae        | Caryophanon           | 2,09827E-05     | 3,62958<br>E-05 | 0,581292 |
| Bacteria | Proteobacteria | Betaproteobacteria    | Burkholderiales       | Alcaligenaceae        | Castellaniella        | 0,00000324<br>4 | 0               | 0,240955 |
| Bacteria | Firmicutes     | Erysipelotrichia      | Erysipelotrichales    | Erysipelotrichaceae   | Catenibacterium       | 8,29944E-05     | 0,00085<br>5222 | 0,00294  |
| Bacteria | Firmicutes     | Clostridia            | Clostridiales         | Lachnospiraceae       | Catonella             | 1,6512E-06      | 1,74363<br>E-05 | 0,017977 |
| Bacteria | Proteobacteria | Alphaproteobacteria   | Caulobacterales       | Caulobacteraceae      | Caulobacter           | 0               | 6,57266<br>E-07 | 0,393769 |
| Bacteria | Actinobacteria | Actinobacteria        | Actinomycetales       | Cellulomonadaceae     | Cellulomonas          | 6,09001E-05     | 7,36758<br>E-07 | 0,105083 |
| Bacteria | Firmicutes     | Clostridia            | Clostridiales         | Ruminococcaceae       | Cellulosibacter       | 2,65999E-05     | 6,53008<br>E-05 | 0,232121 |
| Bacteria | Firmicutes     | Clostridia            | Clostridiales         | Lachnospiraceae       | Cellulosilyticum      | 0,00039053<br>3 | 8,54221<br>E-05 | 0,009809 |
| Bacteria | Actinobacteria | Actinobacteria        | Actinomycetales       | Promicromonosporaceae | Cellulosimicrobium    | 0,00000877<br>6 | 0               | 0,240955 |
| Bacteria | Proteobacteria | Gammaproteobacteria   | Pseudomonadales       | Pseudomonadaceae      | Cellvibrio            | 0               | 1,03554<br>E-05 | 0,393769 |
| Bacteria | Fusobacteria   | Fusobacteriia         | Fusobacteriales       | Fusobacteriaceae      | Cetobacterium         | 1,08134E-06     | 2,88246<br>E-06 | 0,649136 |
| Bacteria | Chlamydiae     | Chlamydiia            | Chlamydiales          | Chlamydiaceae         | Chlamydia             | 3,32529E-05     | 0               | 0,240955 |

|                 |                        |                            |                           |                              |                                  |                 |                 |          |
|-----------------|------------------------|----------------------------|---------------------------|------------------------------|----------------------------------|-----------------|-----------------|----------|
| <i>Bacteria</i> | <i>Proteobacteria</i>  | <i>Deltaproteobacteria</i> | <i>Myxococcales</i>       | <i>Polyangiaceae</i>         | <i>Chondromyces</i>              | 1,27972E-05     | 0               | 0,240955 |
| <i>Bacteria</i> | <i>Bacteroidetes</i>   | <i>Flavobacteriia</i>      | <i>Flavobacteriales</i>   | <i>Flavobacteriaceae</i>     | <i>Chryseobacterium</i>          | 0,00072186<br>1 | 0,00011<br>2955 | 0,018308 |
| <i>Bacteria</i> | <i>Actinobacteria</i>  | <i>Actinobacteria</i>      | <i>Actinomycetales</i>    | <i>Micrococcaceae</i>        | <i>Citricoccus</i>               | 0               | 2,11443<br>E-07 | 0,393769 |
| <i>Bacteria</i> | <i>Synergistetes</i>   | <i>Synergistia</i>         | <i>Synergistales</i>      | <i>Synergistaceae</i>        | <i>Cloacibacillus</i>            | 5,02044E-05     | 5,29517<br>E-05 | 0,08074  |
| <i>Bacteria</i> | <i>Bacteroidetes</i>   | <i>Flavobacteriia</i>      | <i>Flavobacteriales</i>   | <i>Flavobacteriaceae</i>     | <i>Cloacibacterium</i>           | 0,00020399<br>6 | 1,02729<br>E-05 | 0,667698 |
| <i>Bacteria</i> | <i>Firmicutes</i>      | <i>Clostridia</i>          | <i>Clostridiales</i>      | <i>Ruminococcaceae</i>       | <i>Clostridium III</i>           | 1,08134E-05     | 8,50554<br>E-05 | 0,006807 |
| <i>Bacteria</i> | <i>Firmicutes</i>      | <i>Clostridia</i>          | <i>Clostridiales</i>      | <i>Ruminococcaceae</i>       | <i>Clostridium IV</i>            | 0,00508743<br>4 | 0,00461<br>2574 | 0,457391 |
| <i>Bacteria</i> | <i>Firmicutes</i>      | <i>Clostridia</i>          | <i>Clostridiales</i>      | <i>Clostridiaceae 1</i>      | <i>Clostridium sensu stricto</i> | 0,01201745<br>1 | 0,00735<br>7085 | 0,038989 |
| <i>Bacteria</i> | <i>Firmicutes</i>      | <i>Clostridia</i>          | <i>Clostridiales</i>      | <i>Peptostreptococcaceae</i> | <i>Clostridium XI</i>            | 0,01339832<br>1 | 0,00717<br>5893 | 0,016639 |
| <i>Bacteria</i> | <i>Fusobacteria</i>    | <i>Fusobacteriia</i>       | <i>Fusobacteriales</i>    | <i>Fusobacteriaceae</i>      | <i>Clostridium XIX</i>           | 0               | 0,00000<br>2368 | 0,11879  |
| <i>Bacteria</i> | <i>Firmicutes</i>      | <i>Clostridia</i>          | <i>Clostridiales</i>      | <i>Lachnospiraceae</i>       | <i>Clostridium XIVa</i>          | 0,02473216<br>3 | 0,01283<br>1223 | 0,016639 |
| <i>Bacteria</i> | <i>Firmicutes</i>      | <i>Clostridia</i>          | <i>Clostridiales</i>      | <i>Lachnospiraceae</i>       | <i>Clostridium XIVb</i>          | 0,00121196<br>6 | 0,00072<br>9861 | 0,016639 |
| <i>Bacteria</i> | <i>Firmicutes</i>      | <i>Erysipelotrichia</i>    | <i>Erysipelotrichales</i> | <i>Erysipelotrichaceae</i>   | <i>Clostridium XVIII</i>         | 9,75154E-06     | 5,46959<br>E-06 | 0,688915 |
| <i>Bacteria</i> | <i>Actinobacteria</i>  | <i>Actinobacteria</i>      | <i>Coriobacteriales</i>   | <i>Coriobacteriaceae</i>     | <i>Collinsella</i>               | 2,33411E-05     | 0               | 0,00024  |
| <i>Bacteria</i> | <i>Proteobacteria</i>  | <i>Betaproteobacteria</i>  | <i>Burkholderiales</i>    | <i>Comamonadaceae</i>        | <i>Comamonas</i>                 | 0,00013579<br>4 | 0,00010<br>1488 | 0,262864 |
| <i>Bacteria</i> | <i>Proteobacteria</i>  | <i>Betaproteobacteria</i>  | <i>Neisseriales</i>       | <i>Neisseriaceae</i>         | <i>Conchiformibius</i>           | 3,49165E-05     | 0               | 0,088427 |
| <i>Bacteria</i> | <i>Firmicutes</i>      | <i>Erysipelotrichia</i>    | <i>Erysipelotrichales</i> | <i>Erysipelotrichaceae</i>   | <i>Coprobacillus</i>             | 0,00000877<br>6 | 7,07215<br>E-06 | 0,562711 |
| <i>Bacteria</i> | <i>Firmicutes</i>      | <i>Clostridia</i>          | <i>Clostridiales</i>      | <i>Lachnospiraceae</i>       | <i>Coprococcus</i>               | 0,00192138<br>5 | 0,00144<br>7824 | 0,508883 |
| <i>Bacteria</i> | <i>Verrucomicrobia</i> | <i>Opitutae</i>            | <i>Puniceococcales</i>    | <i>Puniceococcaceae</i>      | <i>Coraliomargarita</i>          | 0               | 2,90086<br>E-07 | 0,393769 |
| <i>Bacteria</i> | <i>Actinobacteria</i>  | <i>Actinobacteria</i>      | <i>Actinomycetales</i>    | <i>Corynebacteriaceae</i>    | <i>Corynebacterium</i>           | 0,00114364<br>4 | 0,00279<br>3825 | 0,246846 |

|                 |                                 |                            |                           |                            |                            |                 |                 |          |
|-----------------|---------------------------------|----------------------------|---------------------------|----------------------------|----------------------------|-----------------|-----------------|----------|
| <i>Bacteria</i> | <i>Proteobacteria</i>           | <i>Gammaproteobacteria</i> | <i>Enterobacteriales</i>  | <i>Enterobacteriaceae</i>  | <i>Cronobacter</i>         | 1,36967E-05     | 2,26779<br>E-05 | 0,193236 |
| <i>Bacteria</i> | <i>Bacteroidetes</i>            | <i>Flavobacteriia</i>      | <i>Flavobacteriales</i>   | <i>Flavobacteriaceae</i>   | <i>Cruoricaptor</i>        | 0               | 2,54086<br>E-06 | 0,11879  |
| <i>Bacteria</i> | <i>Proteobacteria</i>           | <i>Betaproteobacteria</i>  | <i>Burkholderiales</i>    | <i>Burkholderiaceae</i>    | <i>Cupriavidus</i>         | 0               | 2,71135<br>E-06 | 0,393769 |
| <i>Bacteria</i> | <i>Proteobacteria</i>           | <i>Betaproteobacteria</i>  | <i>Burkholderiales</i>    | <i>Comamonadaceae</i>      | <i>Curvibacter</i>         | 0               | 3,18627<br>E-06 | 0,393769 |
| <i>Bacteria</i> | <i>Firmicutes</i>               | <i>Clostridia</i>          | <i>Clostridiales</i>      | <i>Defluviitaleaceae</i>   | <i>Defluviitalea</i>       | 0               | 1,79037<br>E-05 | 0,033134 |
| <i>Bacteria</i> | <i>Deinococcus-<br/>Thermus</i> | <i>Deinococci</i>          | <i>Deinococcales</i>      | <i>Deinococcaceae</i>      | <i>Deinococcus</i>         | 2,2016E-06      | 0               | 0,240955 |
| <i>Bacteria</i> | <i>Proteobacteria</i>           | <i>Betaproteobacteria</i>  | <i>Burkholderiales</i>    | <i>Comamonadaceae</i>      | <i>Delftia</i>             | 0,00025072<br>2 | 0,00080<br>051  | 0,679708 |
| <i>Bacteria</i> | <i>Actinobacteria</i>           | <i>Actinobacteria</i>      | <i>Actinomycetales</i>    | <i>Dermabacteraceae</i>    | <i>Dermabacter</i>         | 3,32529E-06     | 0               | 0,240955 |
| <i>Bacteria</i> | <i>Actinobacteria</i>           | <i>Actinobacteria</i>      | <i>Actinomycetales</i>    | <i>Dermacoccaceae</i>      | <i>Dermacoccus</i>         | 6,93649E-05     | 0               | 0,088427 |
| <i>Bacteria</i> | <i>Actinobacteria</i>           | <i>Actinobacteria</i>      | <i>Actinomycetales</i>    | <i>Dermatophilaceae</i>    | <i>Dermatophilus</i>       | 0               | 6,34329<br>E-07 | 0,393769 |
| <i>Bacteria</i> | <i>Firmicutes</i>               | <i>Bacilli</i>             | <i>Lactobacillales</i>    | <i>Carnobacteriaceae</i>   | <i>Desemzia</i>            | 0               | 1,84189<br>E-07 | 0,393769 |
| <i>Bacteria</i> | <i>Proteobacteria</i>           | <i>Deltaproteobacteria</i> | <i>Desulfovibrionales</i> | <i>Desulfomicrobiaceae</i> | <i>Desulfomicrobium</i>    | 3,68655E-05     | 5,84784<br>E-06 | 0,845405 |
| <i>Bacteria</i> | <i>Proteobacteria</i>           | <i>Deltaproteobacteria</i> | <i>Desulfovibrionales</i> | <i>Desulfovibrionaceae</i> | <i>Desulfovibrio</i>       | 0,00028892      | 0,00230<br>3318 | 0,014812 |
| <i>Bacteria</i> | <i>Firmicutes</i>               | <i>Clostridia</i>          | <i>Clostridiales</i>      | <i>Incertae Sedis XI</i>   | <i>Dethiosulfatibacter</i> | 0               | 0,00000<br>021  | 0,393769 |
| <i>Bacteria</i> | <i>Proteobacteria</i>           | <i>Alphaproteobacteria</i> | <i>Rhizobiales</i>        | <i>Hyphomicrobiaceae</i>   | <i>Devosia</i>             | 5,94013E-05     | 0,00003<br>2206 | 0,202876 |
| <i>Bacteria</i> | <i>Firmicutes</i>               | <i>Negativicutes</i>       | <i>Selenomonadales</i>    | <i>Veillonellaceae</i>     | <i>Dialister</i>           | 7,37311E-06     | 0,00112<br>2931 | 0,062837 |
| <i>Bacteria</i> | <i>Proteobacteria</i>           | <i>Betaproteobacteria</i>  | <i>Burkholderiales</i>    | <i>Comamonadaceae</i>      | <i>Diaphorobacter</i>      | 0,00013780<br>3 | 0               | 0,000958 |
| <i>Bacteria</i> | <i>Actinobacteria</i>           | <i>Actinobacteria</i>      | <i>Actinomycetales</i>    | <i>Dietziaceae</i>         | <i>Dietzia</i>             | 0,00011080<br>8 | 0,00025<br>0128 | 0,351615 |
| <i>Bacteria</i> | <i>Firmicutes</i>               | <i>Bacilli</i>             | <i>Lactobacillales</i>    | <i>Carnobacteriaceae</i>   | <i>Dolosigranulum</i>      | 4,32537E-06     | 0               | 0,240955 |
| <i>Bacteria</i> | <i>Firmicutes</i>               | <i>Bacilli</i>             | <i>Bacillales</i>         | <i>Bacillaceae 1</i>       | <i>Domibacillus</i>        | 1,44096E-05     | 0               | 0,240955 |

|                 |                       |                            |                           |                            |                                           |             |             |          |
|-----------------|-----------------------|----------------------------|---------------------------|----------------------------|-------------------------------------------|-------------|-------------|----------|
| <i>Bacteria</i> | <i>Firmicutes</i>     | <i>Clostridia</i>          | <i>Clostridiales</i>      | <i>Lachnospiraceae</i>     | <i>Dorea</i>                              | 0,000714028 | 0,001168751 | 0,804353 |
| <i>Bacteria</i> | <i>Bacteroidetes</i>  | <i>Bacteroidia</i>         | <i>Bacteroidales</i>      | <i>Porphyromonadaceae</i>  | <i>Dysgonomonas</i>                       | 6,65405E-05 | 4,94735E-07 | 0,105083 |
| <i>Bacteria</i> | <i>Actinobacteria</i> | <i>Actinobacteria</i>      | <i>Coriobacteriales</i>   | <i>Coriobacteriaceae</i>   | <i>Eggerthella</i>                        | 0           | 2,32587E-06 | 0,393769 |
| <i>Bacteria</i> | <i>Bacteroidetes</i>  | <i>Flavobacteriia</i>      | <i>Flavobacteriales</i>   | <i>Flavobacteriaceae</i>   | <i>Elizabethkingia</i>                    | 0,000196853 | 6,34329E-07 | 0,002267 |
| <i>Bacteria</i> | <i>Elusimicrobia</i>  | <i>Elusimicrobia</i>       | <i>Elusimicrobiales</i>   | <i>Elusimicrobiaceae</i>   | <i>Elusimicrobium</i>                     | 0           | 0,000208382 | 0,007557 |
| <i>Bacteria</i> | <i>Bacteroidetes</i>  | <i>Flavobacteriia</i>      | <i>Flavobacteriales</i>   | <i>Flavobacteriaceae</i>   | <i>Empedobacter</i>                       | 9,77933E-05 | 3,94684E-05 | 0,118152 |
| <i>Bacteria</i> | <i>Proteobacteria</i> | <i>Gammaproteobacteria</i> | <i>Pseudomonadales</i>    | <i>Moraxellaceae</i>       | <i>Enhydrobacter</i>                      | 0,000577111 | 9,74639E-06 | 0,000247 |
| <i>Bacteria</i> | <i>Proteobacteria</i> | <i>Gammaproteobacteria</i> | <i>Enterobacteriales</i>  | <i>Enterobacteriaceae</i>  | <i>Enterobacter</i>                       | 4,61002E-05 | 9,71147E-06 | 0,018426 |
| <i>Bacteria</i> | <i>Firmicutes</i>     | <i>Bacilli</i>             | <i>Lactobacillales</i>    | <i>Enterococcaceae</i>     | <i>Enterococcus</i>                       | 0,000619571 | 4,11948E-05 | 0,011377 |
| <i>Bacteria</i> | <i>Actinobacteria</i> | <i>Actinobacteria</i>      | <i>Coriobacteriales</i>   | <i>Coriobacteriaceae</i>   | <i>Enterorhabdus</i>                      | 5,4724E-06  | 2,59843E-06 | 0,728372 |
| <i>Bacteria</i> | <i>Firmicutes</i>     | <i>Erysipelotrichia</i>    | <i>Erysipelotrichales</i> | <i>Erysipelotrichaceae</i> | <i>Erysipelothrix</i>                     | 0           | 0,000116852 | 0,007557 |
| <i>Bacteria</i> | <i>Firmicutes</i>     | <i>Erysipelotrichia</i>    | <i>Erysipelotrichales</i> | <i>Erysipelotrichaceae</i> | <i>Erysipelotrichaceae_incertae_sedis</i> | 0,000299978 | 0,002680763 | 0,002239 |
| <i>Bacteria</i> | <i>Proteobacteria</i> | <i>Alphaproteobacteria</i> | <i>Sphingomonadales</i>   | <i>Erythrobacteraceae</i>  | <i>Erythrobacter</i>                      | 0,000019264 | 0           | 0,240955 |
| <i>Bacteria</i> | <i>Proteobacteria</i> | <i>Gammaproteobacteria</i> | <i>Enterobacteriales</i>  | <i>Enterobacteriaceae</i>  | <i>Escherichia/Shigella</i>               | 0,005282428 | 0,022126692 | 0,057543 |
| <i>Bacteria</i> | <i>Firmicutes</i>     | <i>Clostridia</i>          | <i>Clostridiales</i>      | <i>Ruminococcaceae</i>     | <i>Ethanoligenens</i>                     | 4,00008E-05 | 0,000198388 | 0,309563 |
| <i>Bacteria</i> | <i>Firmicutes</i>     | <i>Clostridia</i>          | <i>Clostridiales</i>      | <i>Eubacteriaceae</i>      | <i>Eubacterium</i>                        | 0,001177985 | 0,009923741 | 0,031803 |
| <i>Bacteria</i> | <i>Firmicutes</i>     | <i>Bacilli</i>             | <i>Lactobacillales</i>    | <i>Aerococcaceae</i>       | <i>Facklamia</i>                          | 0,000332198 | 0,000145346 | 0,122519 |
| <i>Bacteria</i> | <i>Firmicutes</i>     | <i>Clostridia</i>          | <i>Clostridiales</i>      | <i>Ruminococcaceae</i>     | <i>Faecalibacterium</i>                   | 0,000975977 | 0,016317624 | 0,000957 |

|                 |                         |                            |                           |                                        |                         |                 |                 |          |
|-----------------|-------------------------|----------------------------|---------------------------|----------------------------------------|-------------------------|-----------------|-----------------|----------|
| <i>Bacteria</i> | <i>Firmicutes</i>       | <i>Clostridia</i>          | <i>Clostridiales</i>      | <i>Ruminococcaceae</i>                 | <i>Fastidiosipila</i>   | 0               | 5,48393<br>E-05 | 0,11879  |
| <i>Bacteria</i> | <i>Fibrobacteres</i>    | <i>Fibrobacteria</i>       | <i>Fibrobacterales</i>    | <i>Fibrobacteraceae</i>                | <i>Fibrobacter</i>      | 0,00020988<br>6 | 0,00132<br>7895 | 0,025524 |
| <i>Bacteria</i> | <i>Firmicutes</i>       | <i>Clostridia</i>          | <i>Clostridiales</i>      | <i>Peptostreptococcaceae</i>           | <i>Filifactor</i>       | 1,02387E-05     | 1,08809<br>E-05 | 0,745201 |
| <i>Bacteria</i> | <i>Firmicutes</i>       | <i>Clostridia</i>          | <i>Clostridiales</i>      | <i>Clostridiales_Incertae Sedis XI</i> | <i>Finegoldia</i>       | 0,00019692<br>8 | 0               | 0,010871 |
| <i>Bacteria</i> | <i>Bacteroidetes</i>    | <i>Sphingobacteriia</i>    | <i>Sphingobacteriales</i> | <i>Chitinophagaceae</i>                | <i>Flavitalea</i>       | 0               | 2,11443<br>E-07 | 0,393769 |
| <i>Bacteria</i> | <i>Bacteroidetes</i>    | <i>Flavobacteriia</i>      | <i>Flavobacteriales</i>   | <i>Flavobacteriaceae</i>               | <i>Flavobacterium</i>   | 0,00022904      | 5,65785<br>E-05 | 0,08074  |
| <i>Bacteria</i> | <i>Firmicutes</i>       | <i>Clostridia</i>          | <i>Clostridiales</i>      | <i>Ruminococcaceae</i>                 | <i>Flavonifactor</i>    | 0,00486277<br>4 | 0,00099         | 0,00028  |
| <i>Bacteria</i> | <i>Fusobacteria</i>     | <i>Fusobacteriia</i>       | <i>Fusobacteriales</i>    | <i>Fusobacteriaceae</i>                | <i>Fusobacterium</i>    | 0,00161851<br>1 | 0,00111<br>4342 | 0,038989 |
| <i>Bacteria</i> | <i>Actinobacteria</i>   | <i>Actinobacteria</i>      | <i>Gaiellales</i>         | <i>Gaiellaceae</i>                     | <i>Gaiella</i>          | 1,6512E-06      | 0               | 0,240955 |
| <i>Bacteria</i> | <i>Bacteroidetes</i>    | <i>Flavobacteriia</i>      | <i>Flavobacteriales</i>   | <i>Flavobacteriaceae</i>               | <i>Galbibacter</i>      | 0               | 0,00000<br>042  | 0,393769 |
| <i>Bacteria</i> | <i>Firmicutes</i>       | <i>Clostridia</i>          | <i>Clostridiales</i>      | <i>Clostridiales_Incertae Sedis XI</i> | <i>Gallicola</i>        | 0               | 3,55411<br>E-06 | 0,215311 |
| <i>Bacteria</i> | <i>Actinobacteria</i>   | <i>Actinobacteria</i>      | <i>Bifidobacteriales</i>  | <i>Bifidobacteriaceae</i>              | <i>Gardnerella</i>      | 0,00000129<br>6 | 4,65175<br>E-06 | 0,876911 |
| <i>Bacteria</i> | <i>Bacteroidetes</i>    | <i>Flavobacteriia</i>      | <i>Flavobacteriales</i>   | <i>Flavobacteriaceae</i>               | <i>Gelidibacter</i>     | 2,56703E-05     | 0               | 0,240955 |
| <i>Bacteria</i> | <i>Firmicutes</i>       | <i>Bacilli</i>             | <i>Bacillales</i>         | <i>Bacillales_Incertae Sedis XI</i>    | <i>Gemella</i>          | 0,00016909<br>1 | 2,79493<br>E-05 | 0,08083  |
| <i>Bacteria</i> | <i>Gemmatimonadetes</i> | <i>Gemmatimonadetes</i>    | <i>Gemmatimonadales</i>   | <i>Gemmatimonadaceae</i>               | <i>Gemmatimonas</i>     | 0               | 0,00000<br>1162 | 0,393769 |
| <i>Bacteria</i> | <i>Firmicutes</i>       | <i>Clostridia</i>          | <i>Clostridiales</i>      | <i>Ruminococcaceae</i>                 | <i>Gemmiger</i>         | 0,00174954      | 0,00754<br>3141 | 0,006432 |
| <i>Bacteria</i> | <i>Firmicutes</i>       | <i>Bacilli</i>             | <i>Bacillales</i>         | <i>Bacillaceae 1</i>                   | <i>Geobacillus</i>      | 1,42556E-05     | 0               | 0,240955 |
| <i>Bacteria</i> | <i>Proteobacteria</i>   | <i>Deltaproteobacteria</i> | <i>Desulfuromonadales</i> | <i>Geobacteraceae</i>                  | <i>Geopsychrobacter</i> | 0               | 3,87335<br>E-07 | 0,393769 |
| <i>Bacteria</i> | <i>Actinobacteria</i>   | <i>Actinobacteria</i>      | <i>Actinomycetales</i>    | <i>Bogoriellaceae</i>                  | <i>Georgenia</i>        | 0               | 2,07214<br>E-05 | 0,393769 |
| <i>Bacteria</i> | <i>Firmicutes</i>       | <i>Bacilli</i>             | <i>Lactobacillales</i>    | <i>Aerococcaceae</i>                   | <i>Globicatella</i>     | 9,99282E-05     | 0,00013<br>7036 | 0,348499 |

|                 |                                  |                              |                           |                                        |                                 |             |             |          |
|-----------------|----------------------------------|------------------------------|---------------------------|----------------------------------------|---------------------------------|-------------|-------------|----------|
| <i>Bacteria</i> | <i>Actinobacteria</i>            | <i>Actinobacteria</i>        | <i>Coriobacteriales</i>   | <i>Coriobacteriaceae</i>               | <i>Gordonibacter</i>            | 5,78334E-05 | 4,08071E-05 | 0,16117  |
| <i>Bacteria</i> | <i>Acidobacteria</i>             | <i>Acidobacteria_Gp3</i>     | <i>Gp3</i>                | <i>Gp3</i>                             | <i>Gp3</i>                      | 7,31336E-06 | 0           | 0,240955 |
| <i>Bacteria</i> | <i>Acidobacteria</i>             | <i>Acidobacteria_Gp4</i>     | <i>Gp4</i>                | <i>Gp4</i>                             | <i>Gp4</i>                      | 0,000422134 | 0           | 0,240955 |
| <i>Bacteria</i> | <i>Acidobacteria</i>             | <i>Acidobacteria_Gp6</i>     | <i>Gp6</i>                | <i>Gp6</i>                             | <i>Gp6</i>                      | 0,000011008 | 2,19901E-05 | 0,876911 |
| <i>Bacteria</i> | <i>Cyanobacteria/Chloroplast</i> | <i>Cyanobacteria</i>         | <i>Family I</i>           | <i>Family I</i>                        | <i>Gp1</i>                      | 0,000101649 | 0           | 0,003397 |
| <i>Bacteria</i> | <i>Firmicutes</i>                | <i>Clostridia</i>            | <i>Clostridiales</i>      | <i>Gracilibacteraceae</i>              | <i>Gracilibacter</i>            | 3,35743E-05 | 0           | 0,240955 |
| <i>Bacteria</i> | <i>Firmicutes</i>                | <i>Bacilli</i>               | <i>Lactobacillales</i>    | <i>Carnobacteriaceae</i>               | <i>Granulicatella</i>           | 2,73537E-05 | 0           | 0,088427 |
| <i>Bacteria</i> | <i>Actinobacteria</i>            | <i>Actinobacteria</i>        | <i>Actinomycetales</i>    | <i>Microbacteriaceae</i>               | <i>Gulosibacter</i>             | 2,2016E-06  | 1,55553E-05 | 0,876911 |
| <i>Bacteria</i> | <i>Proteobacteria</i>            | <i>Gammaproteobacteria</i>   | <i>Pasteurellales</i>     | <i>Pasteurellaceae</i>                 | <i>Haemophilus</i>              | 0,001647782 | 0,002717378 | 0,025719 |
| <i>Bacteria</i> | <i>Bacteroidetes</i>             | <i>Bacteroidia</i>           | <i>Bacteroidales</i>      | <i>Prevotellaceae</i>                  | <i>Hallella</i>                 | 7,79493E-05 | 0,002501353 | 0,000524 |
| <i>Bacteria</i> | <i>Verrucomicrobia</i>           | <i>Verrucomicrobiae</i>      | <i>Verrucomicrobiales</i> | <i>Verrucomicrobiaceae</i>             | <i>Haloferula</i>               | 2,56703E-05 | 0           | 0,240955 |
| <i>Bacteria</i> | <i>Actinobacteria</i>            | <i>Actinobacteria</i>        | <i>Actinomycetales</i>    | <i>Dermabacteraceae</i>                | <i>Helcobacillus</i>            | 0,000016432 | 0           | 0,088427 |
| <i>Bacteria</i> | <i>Firmicutes</i>                | <i>Clostridia</i>            | <i>Clostridiales</i>      | <i>Clostridiales_Incertae Sedis XI</i> | <i>Helcococcus</i>              | 0,0003125   | 0,000007761 | 0,034509 |
| <i>Bacteria</i> | <i>Proteobacteria</i>            | <i>Epsilonproteobacteria</i> | <i>Campylobacterales</i>  | <i>Helicobacteraceae</i>               | <i>Helicobacter</i>             | 0,000143027 | 0,000151244 | 0,865516 |
| <i>Bacteria</i> | <i>Firmicutes</i>                | <i>Clostridia</i>            | <i>Clostridiales</i>      | <i>Lachnospiraceae</i>                 | <i>Hespellia</i>                | 3,68655E-05 | 2,02257E-06 | 0,845405 |
| <i>Bacteria</i> | <i>Proteobacteria</i>            | <i>Alphaproteobacteria</i>   | <i>Rhizobiales</i>        | <i>Phyllobacteriaceae</i>              | <i>Hoeflea</i>                  | 7,31336E-06 | 0           | 0,240955 |
| <i>Bacteria</i> | <i>Firmicutes</i>                | <i>Erysipelotrichia</i>      | <i>Erysipelotrichales</i> | <i>Erysipelotrichaceae</i>             | <i>Holdemania</i>               | 0,000268651 | 0,000789688 | 0,030314 |
| <i>Bacteria</i> | <i>Firmicutes</i>                | <i>Clostridia</i>            | <i>Clostridiales</i>      | <i>Lachnospiraceae</i>                 | <i>Howardella</i>               | 0           | 2,19179E-05 | 0,063994 |
| <i>Bacteria</i> | <i>Proteobacteria</i>            | <i>Epsilonproteobacteria</i> | <i>Campylobacterales</i>  | <i>Hydrogenimonaceae</i>               | <i>Hydrogenimonas</i>           | 0           | 6,03093E-07 | 0,393769 |
| <i>Bacteria</i> | <i>Firmicutes</i>                | <i>Clostridia</i>            | <i>Clostridiales</i>      | <i>Ruminococcaceae</i>                 | <i>Hydrogenoanaerobacterium</i> | 0,000226213 | 2,96312E-05 | 0,009323 |
| <i>Bacteria</i> | <i>Aquificae</i>                 | <i>Aquificae</i>             | <i>Aquificales</i>        | <i>Aquificaceae</i>                    | <i>Hydrogenobacter</i>          | 0           | 7,7467E-07  | 0,393769 |

|                 |                       |                            |                           |                            |                          |                 |                 |          |
|-----------------|-----------------------|----------------------------|---------------------------|----------------------------|--------------------------|-----------------|-----------------|----------|
| <i>Bacteria</i> | <i>Proteobacteria</i> | <i>Betaproteobacteria</i>  | <i>Burkholderiales</i>    | <i>Comamonadaceae</i>      | <i>Hydrogenophaga</i>    | 2,85225E-06     | 1,84189<br>E-07 | 0,756733 |
| <i>Bacteria</i> | <i>Bacteroidetes</i>  | <i>Sphingobacteriia</i>    | <i>Sphingobacteriales</i> | <i>Chitinophagaceae</i>    | <i>Hydrotalea</i>        | 0               | 4,94735<br>E-07 | 0,393769 |
| <i>Bacteria</i> | <i>Bacteroidetes</i>  | <i>Cytophagia</i>          | <i>Cytophagales</i>       | <i>Cytophagaceae</i>       | <i>Hymenobacter</i>      | 0,00000877<br>6 | 0               | 0,240955 |
| <i>Bacteria</i> | <i>Proteobacteria</i> | <i>Alphaproteobacteria</i> | <i>Rhizobiales</i>        | <i>Hyphomicrobiaceae</i>   | <i>Hyphomicrobium</i>    | 4,40319E-06     | 0,00015<br>9602 | 0,263359 |
| <i>Bacteria</i> | <i>Actinobacteria</i> | <i>Actinobacteria</i>      | <i>Acidimicrobiales</i>   | <i>Acidimicrobiaceae</i>   | <i>Ilumatobacter</i>     | 3,84947E-05     | 6,34329<br>E-07 | 0,298379 |
| <i>Bacteria</i> | <i>Proteobacteria</i> | <i>Alphaproteobacteria</i> | <i>Rhodospirillales</i>   | <i>Rhodospirillaceae</i>   | <i>Insolitispirillum</i> | 0,00333733<br>9 | 0,00000<br>084  | 8,54E-05 |
| <i>Bacteria</i> | <i>Actinobacteria</i> | <i>Actinobacteria</i>      | <i>Actinomycetales</i>    | <i>Intrasporangiaceae</i>  | <i>Janibacter</i>        | 2,98895E-05     | 1,36504<br>E-05 | 0,1625   |
| <i>Bacteria</i> | <i>Proteobacteria</i> | <i>Betaproteobacteria</i>  | <i>Burkholderiales</i>    | <i>Oxalobacteraceae</i>    | <i>Janthinobacterium</i> | 0               | 5,52568<br>E-07 | 0,393769 |
| <i>Bacteria</i> | <i>Firmicutes</i>     | <i>Bacilli</i>             | <i>Bacillales</i>         | <i>Staphylococcaceae</i>   | <i>Jeotgalicoccus</i>    | 0,00040817<br>3 | 0,00143<br>2052 | 0,404809 |
| <i>Bacteria</i> | <i>Firmicutes</i>     | <i>Clostridia</i>          | <i>Clostridiales</i>      | <i>Lachnospiraceae</i>     | <i>Johnsonella</i>       | 2,16269E-06     | 0               | 0,240955 |
| <i>Bacteria</i> | <i>Synergistetes</i>  | <i>Synergistia</i>         | <i>Synergistales</i>      | <i>Synergistaceae</i>      | <i>Jonquetella</i>       | 0               | 1,28304<br>E-05 | 0,11879  |
| <i>Bacteria</i> | <i>Firmicutes</i>     | <i>Erysipelotrichia</i>    | <i>Erysipelotrichales</i> | <i>Erysipelotrichaceae</i> | <i>Kandleria</i>         | 0,00003317<br>9 | 4,60169<br>E-05 | 0,745201 |
| <i>Bacteria</i> | <i>Actinobacteria</i> | <i>Actinobacteria</i>      | <i>Actinomycetales</i>    | <i>Kineosporiaceae</i>     | <i>Kineococcus</i>       | 5,54216E-06     | 0               | 0,240955 |
| <i>Bacteria</i> | <i>Proteobacteria</i> | <i>Betaproteobacteria</i>  | <i>Neisseriales</i>       | <i>Neisseriaceae</i>       | <i>Kingella</i>          | 0,00422679<br>5 | 6,31892<br>E-05 | 0,000247 |
| <i>Bacteria</i> | <i>Proteobacteria</i> | <i>Gammaproteobacteria</i> | <i>Enterobacteriales</i>  | <i>Enterobacteriaceae</i>  | <i>Klebsiella</i>        | 0,08805895<br>2 | 9,13837<br>E-05 | 0,000263 |
| <i>Bacteria</i> | <i>Actinobacteria</i> | <i>Actinobacteria</i>      | <i>Actinomycetales</i>    | <i>Micrococcaceae</i>      | <i>Kocuria</i>           | 0,00021088<br>6 | 2,19089<br>E-07 | 8,54E-05 |
| <i>Bacteria</i> | <i>Proteobacteria</i> | <i>Deltaproteobacteria</i> | <i>Myxococcales</i>       | <i>Kofleriaceae</i>        | <i>Kofleria</i>          | 0,00000324<br>4 | 0               | 0,240955 |
| <i>Bacteria</i> | <i>Firmicutes</i>     | <i>Bacilli</i>             | <i>Bacillales</i>         | <i>Planococcaceae</i>      | <i>Kurthia</i>           | 0,00033030<br>5 | 0,00214<br>5709 | 0,866788 |
| <i>Bacteria</i> | <i>Actinobacteria</i> | <i>Actinobacteria</i>      | <i>Actinomycetales</i>    | <i>Dermaococcaceae</i>     | <i>Kytococcus</i>        | 1,66524E-05     | 0               | 0,088427 |
| <i>Bacteria</i> | <i>Proteobacteria</i> | <i>Alphaproteobacteria</i> | <i>Rhizobiales</i>        | <i>Xanthobacteraceae</i>   | <i>Labrys</i>            | 0               | 9,58885<br>E-05 | 0,215311 |



|                 |                        |                                              |                                              |                                              |                                              |             |             |          |
|-----------------|------------------------|----------------------------------------------|----------------------------------------------|----------------------------------------------|----------------------------------------------|-------------|-------------|----------|
| <i>Bacteria</i> | <i>Firmicutes</i>      | <i>Clostridia</i>                            | <i>Clostridiales</i>                         | <i>Lachnospiraceae</i>                       | <i>Lachnoanaerobaculum</i>                   | 9,19418E-05 | 3,42424E-05 | 0,699444 |
| <i>Bacteria</i> | <i>Firmicutes</i>      | <i>Clostridia</i>                            | <i>Clostridiales</i>                         | <i>Lachnospiraceae</i>                       | <i>Lachnobacterium</i>                       | 0           | 2,25195E-05 | 0,016307 |
| <i>Bacteria</i> | <i>Firmicutes</i>      | <i>Clostridia</i>                            | <i>Clostridiales</i>                         | <i>Lachnospiraceae</i>                       | <i>Lachnospira</i>                           | 3,05014E-06 | 2,94039E-05 | 0,0052   |
| <i>Bacteria</i> | <i>Firmicutes</i>      | <i>Clostridia</i>                            | <i>Clostridiales</i>                         | <i>Lachnospiraceae</i>                       | <i>Lachnospiraceae_incertae_sedis</i>        | 0,003368005 | 0,010866986 | 0,116677 |
| <i>Bacteria</i> | <i>Firmicutes</i>      | <i>Bacilli</i>                               | <i>Lactobacillales</i>                       | <i>Lactobacillaceae</i>                      | <i>Lactobacillus</i>                         | 0,014010261 | 0,044019698 | 0,031803 |
| <i>Bacteria</i> | <i>Firmicutes</i>      | <i>Bacilli</i>                               | <i>Lactobacillales</i>                       | <i>Streptococcaceae</i>                      | <i>Lactococcus</i>                           | 0,000145498 | 0,000021169 | 0,001502 |
| <i>Bacteria</i> | <i>Firmicutes</i>      | <i>Clostridia</i>                            | <i>Clostridiales</i>                         | <i>Lachnospiraceae</i>                       | <i>Lactonifactor</i>                         | 2,89948E-05 | 4,60225E-05 | 0,763965 |
| <i>Bacteria</i> | <i>Firmicutes</i>      | <i>Bacilli</i>                               | <i>Lactobacillales</i>                       | <i>Streptococcaceae</i>                      | <i>Lactovum</i>                              | 2,56347E-06 | 1,33581E-05 | 0,198154 |
| <i>Bacteria</i> | <i>Latescibacteria</i> | <i>Latescibacteria_genera_incertae_sedis</i> | <i>Latescibacteria_genera_incertae_sedis</i> | <i>Latescibacteria_genera_incertae_sedis</i> | <i>Latescibacteria_genera_incertae_sedis</i> | 0           | 1,74051E-06 | 0,393769 |
| <i>Bacteria</i> | <i>Proteobacteria</i>  | <i>Gammaproteobacteria</i>                   | <i>Enterobacteriales</i>                     | <i>Enterobacteriaceae</i>                    | <i>Leclercia</i>                             | 2,16741E-05 | 7,01232E-07 | 0,042978 |
| <i>Bacteria</i> | <i>Proteobacteria</i>  | <i>Gammaproteobacteria</i>                   | <i>Legionellales</i>                         | <i>Legionellaceae</i>                        | <i>Legionella</i>                            | 7,5694E-06  | 0           | 0,240955 |
| <i>Bacteria</i> | <i>Proteobacteria</i>  | <i>Gammaproteobacteria</i>                   | <i>Enterobacteriales</i>                     | <i>Enterobacteriaceae</i>                    | <i>Lelliottia</i>                            | 2,85225E-06 | 0           | 0,240955 |
| <i>Bacteria</i> | <i>Fusobacteria</i>    | <i>Fusobacteriia</i>                         | <i>Fusobacteriales</i>                       | <i>Leptotrichiaceae</i>                      | <i>Leptotrichia</i>                          | 0,000371186 | 0,000068242 | 0,137807 |
| <i>Bacteria</i> | <i>Actinobacteria</i>  | <i>Actinobacteria</i>                        | <i>Actinomycetales</i>                       | <i>Microbacteriaceae</i>                     | <i>Leucobacter</i>                           | 0,000039858 | 1,89614E-05 | 0,293984 |
| <i>Bacteria</i> | <i>Firmicutes</i>      | <i>Bacilli</i>                               | <i>Lactobacillales</i>                       | <i>Leuconostocaceae</i>                      | <i>Leuconostoc</i>                           | 0,000192518 | 3,08609E-05 | 0,004916 |
| <i>Bacteria</i> | <i>Proteobacteria</i>  | <i>Gammaproteobacteria</i>                   | <i>Xanthomonadales</i>                       | <i>Xanthomonadaceae</i>                      | <i>Luteimonas</i>                            | 5,25468E-05 | 2,11443E-07 | 0,105083 |
| <i>Bacteria</i> | <i>Actinobacteria</i>  | <i>Actinobacteria</i>                        | <i>Actinomycetales</i>                       | <i>Propionibacteriaceae</i>                  | <i>Luteococcus</i>                           | 0,000014665 | 3,9283E-06  | 0,643325 |
| <i>Bacteria</i> | <i>Firmicutes</i>      | <i>Clostridia</i>                            | <i>Clostridiales</i>                         | <i>Gracilibacteraceae</i>                    | <i>Lutispora</i>                             | 4,84233E-05 | 5,83238E-06 | 0,367728 |
| <i>Bacteria</i> | <i>Proteobacteria</i>  | <i>Gammaproteobacteria</i>                   | <i>Xanthomonadales</i>                       | <i>Xanthomonadaceae</i>                      | <i>Lysobacter</i>                            | 2,85476E-05 | 4,94735E-07 | 0,756733 |

|                 |                       |                            |                           |                                          |                           |                 |                 |          |
|-----------------|-----------------------|----------------------------|---------------------------|------------------------------------------|---------------------------|-----------------|-----------------|----------|
| <i>Bacteria</i> | <i>Firmicutes</i>     | <i>Bacilli</i>             | <i>Bacillales</i>         | <i>Staphylococcaceae</i>                 | <i>Macrococcus</i>        | 0               | 2,36616<br>E-05 | 0,393769 |
| <i>Bacteria</i> | <i>Proteobacteria</i> | <i>Gammaproteobacteria</i> | <i>Pasteurellales</i>     | <i>Pasteurellaceae</i>                   | <i>Mannheimia</i>         | 0,00002201<br>6 | 3,38309<br>E-06 | 0,756733 |
| <i>Bacteria</i> | <i>Proteobacteria</i> | <i>Gammaproteobacteria</i> | <i>Oceanospirillales</i>  | <i>Oceanospirillaceae</i>                | <i>Marinospirillum</i>    | 3,36415E-05     | 0               | 0,240955 |
| <i>Bacteria</i> | <i>Proteobacteria</i> | <i>Alphaproteobacteria</i> | <i>Rhodospirillales</i>   | <i>Rhodospirillaceae</i>                 | <i>Marispirillum</i>      | 0               | 0,00000<br>021  | 0,393769 |
| <i>Bacteria</i> | <i>Actinobacteria</i> | <i>Actinobacteria</i>      | <i>Actinomycetales</i>    | <i>Nocardioideae</i>                     | <i>Marmoricola</i>        | 1,08134E-06     | 0               | 0,240955 |
| <i>Bacteria</i> | <i>Proteobacteria</i> | <i>Alphaproteobacteria</i> | <i>Rhizobiales</i>        | <i>Aurantimonadaceae</i>                 | <i>Marteella</i>          | 0,00000129<br>6 | 0               | 0,240955 |
| <i>Bacteria</i> | <i>Firmicutes</i>     | <i>Clostridia</i>          | <i>Clostridiales</i>      | <i>Lachnospiraceae</i>                   | <i>Marvinbryantia</i>     | 0,00059134<br>7 | 1,41482<br>E-06 | 0,00016  |
| <i>Bacteria</i> | <i>Proteobacteria</i> | <i>Betaproteobacteria</i>  | <i>Burkholderiales</i>    | <i>Oxalobacteraceae</i>                  | <i>Massilia</i>           | 4,14254E-05     | 0               | 0,010871 |
| <i>Bacteria</i> | <i>Firmicutes</i>     | <i>Negativicutes</i>       | <i>Selenomonadales</i>    | <i>Veillonellaceae</i>                   | <i>Megasphaera</i>        | 0,00032724<br>5 | 0,04975         | 0,00128  |
| <i>Bacteria</i> | <i>Bacteroidetes</i>  | <i>Cytophagia</i>          | <i>Cytophagales</i>       | <i>Cytophagaceae</i>                     | <i>Meniscus</i>           | 0               | 1,96809<br>E-06 | 0,11879  |
| <i>Bacteria</i> | <i>Proteobacteria</i> | <i>Alphaproteobacteria</i> | <i>Rhizobiales</i>        | <i>Phyllobacteriaceae</i>                | <i>Mesorhizobium</i>      | 0,00013249<br>1 | 0,00084<br>7639 | 0,933608 |
| <i>Archaea</i>  | <i>Euryarchaeota</i>  | <i>Methanobacteria</i>     | <i>Methanobacteriales</i> | <i>Methanobacteriaceae</i>               | <i>Methanobrevibacter</i> | 0,00036087<br>3 | 0,00080<br>9144 | 0,186449 |
| <i>Archaea</i>  | <i>Euryarchaeota</i>  | <i>Methanobacteria</i>     | <i>Methanobacteriales</i> | <i>Methanobacteriaceae</i>               | <i>Methanosphaera</i>     | 0               | 7,01232<br>E-07 | 0,393769 |
| <i>Bacteria</i> | <i>Proteobacteria</i> | <i>Alphaproteobacteria</i> | <i>Rhizobiales</i>        | <i>Methylobacteriaceae</i>               | <i>Methylobacterium</i>   | 9,37907E-05     | 0,00001<br>0458 | 0,027679 |
| <i>Bacteria</i> | <i>Actinobacteria</i> | <i>Actinobacteria</i>      | <i>Actinomycetales</i>    | <i>Microbacteriaceae</i>                 | <i>Microbacterium</i>     | 0,00023982<br>2 | 0,00005<br>7493 | 0,002708 |
| <i>Bacteria</i> | <i>Actinobacteria</i> | <i>Actinobacteria</i>      | <i>Actinomycetales</i>    | <i>Micrococcaceae</i>                    | <i>Micrococcus</i>        | 0,00059333<br>8 | 4,19139<br>E-05 | 0,000517 |
| <i>Bacteria</i> | <i>Actinobacteria</i> | <i>Actinobacteria</i>      | <i>Actinomycetales</i>    | <i>Nocardiaceae</i>                      | <i>Millisia</i>           | 1,84328E-06     | 6,57266<br>E-07 | 0,756733 |
| <i>Bacteria</i> | <i>Firmicutes</i>     | <i>Negativicutes</i>       | <i>Selenomonadales</i>    | <i>Veillonellaceae</i>                   | <i>Mitsuokella</i>        | 0,00000324<br>4 | 0,00190<br>1084 | 0,000376 |
| <i>Bacteria</i> | <i>Firmicutes</i>     | <i>Clostridia</i>          | <i>Clostridiales</i>      | <i>Clostridiales_Incertae Sedis XIII</i> | <i>Mogibacterium</i>      | 7,82044E-05     | 2,66556<br>E-05 | 0,475912 |
| <i>Bacteria</i> | <i>Bacteroidetes</i>  | <i>Flavobacteriia</i>      | <i>Flavobacteriales</i>   | <i>Flavobacteriaceae</i>                 | <i>Moheibacter</i>        | 0               | 1,48631<br>E-05 | 0,215311 |

|                 |                        |                            |                          |                           |                        |                 |                 |          |
|-----------------|------------------------|----------------------------|--------------------------|---------------------------|------------------------|-----------------|-----------------|----------|
| <i>Bacteria</i> | <i>Proteobacteria</i>  | <i>Gammaproteobacteria</i> | <i>Pseudomonadales</i>   | <i>Moraxellaceae</i>      | <i>Moraxella</i>       | 0,34040911      | 0,03189<br>5711 | 0,000524 |
| <i>Bacteria</i> | <i>Firmicutes</i>      | <i>Clostridia</i>          | <i>Clostridiales</i>     | <i>Lachnospiraceae</i>    | <i>Moryella</i>        | 4,06014E-06     | 0,00000<br>021  | 0,298379 |
| <i>Bacteria</i> | <i>Deferribacteres</i> | <i>Deferribacteres</i>     | <i>Deferribacterales</i> | <i>Deferribacteraceae</i> | <i>Mucispirillum</i>   | 0,00250709<br>7 | 0,00157<br>0697 | 0,016591 |
| <i>Bacteria</i> | <i>Actinobacteria</i>  | <i>Actinobacteria</i>      | <i>Actinomycetales</i>   | <i>Mycobacteriaceae</i>   | <i>Mycobacterium</i>   | 1,40237E-05     | 0               | 0,088427 |
| <i>Bacteria</i> | <i>Tenericutes</i>     | <i>Mollicutes</i>          | <i>Mycoplasmatales</i>   | <i>Mycoplasmataceae</i>   | <i>Mycoplasma</i>      | 0,06717919<br>7 | 0,10323<br>6434 | 0,508883 |
| <i>Bacteria</i> | <i>Bacteroidetes</i>   | <i>Flavobacteriia</i>      | <i>Flavobacteriales</i>  | <i>Flavobacteriaceae</i>  | <i>Myroides</i>        | 5,18897E-05     | 2,34003<br>E-05 | 0,483569 |
| <i>Bacteria</i> | <i>Firmicutes</i>      | <i>Clostridia</i>          | <i>Clostridiales</i>     | <i>Natranaerovirga</i>    | <i>Natranaerovirga</i> | 0               | 0,00000<br>042  | 0,393769 |
| <i>Bacteria</i> | <i>Proteobacteria</i>  | <i>Betaproteobacteria</i>  | <i>Burkholderiales</i>   | <i>Oxalobacteraceae</i>   | <i>Naxibacter</i>      | 1,46267E-06     | 0               | 0,240955 |
| <i>Bacteria</i> | <i>Proteobacteria</i>  | <i>Betaproteobacteria</i>  | <i>Neisseriales</i>      | <i>Neisseriaceae</i>      | <i>Neisseria</i>       | 0,01013584<br>8 | 0,00018<br>857  | 0,000278 |
| <i>Bacteria</i> | <i>Actinobacteria</i>  | <i>Actinobacteria</i>      | <i>Actinomycetales</i>   | <i>Micrococcaceae</i>     | <i>Nesterenkonia</i>   | 4,43296E-05     | 1,45694<br>E-05 | 1        |
| <i>Bacteria</i> | <i>Proteobacteria</i>  | <i>Gammaproteobacteria</i> | <i>Pasteurellales</i>    | <i>Pasteurellaceae</i>    | <i>Nicoletella</i>     | 2,85225E-06     | 0               | 0,240955 |
| <i>Bacteria</i> | <i>Proteobacteria</i>  | <i>Alphaproteobacteria</i> | <i>Rhizobiales</i>       | <i>Bradyrhizobiaceae</i>  | <i>Nitrobacter</i>     | 0               | 4,22454<br>E-06 | 0,11879  |
| <i>Bacteria</i> | <i>Actinobacteria</i>  | <i>Actinobacteria</i>      | <i>Actinomycetales</i>   | <i>Nocardioideaceae</i>   | <i>Nocardioides</i>    | 7,30464E-05     | 1,95496<br>E-05 | 0,141383 |
| <i>Bacteria</i> | <i>Actinobacteria</i>  | <i>Actinobacteria</i>      | <i>Actinomycetales</i>   | <i>Nocardiopsaceae</i>    | <i>Nocardiopsis</i>    | 0               | 5,43338<br>E-05 | 0,11879  |
| <i>Bacteria</i> | <i>Firmicutes</i>      | <i>Bacilli</i>             | <i>Bacillales</i>        | <i>Staphylococcaceae</i>  | <i>Nosocomiicoccus</i> | 0               | 2,60879<br>E-06 | 0,215311 |
| <i>Bacteria</i> | <i>Proteobacteria</i>  | <i>Alphaproteobacteria</i> | <i>Sphingomonadales</i>  | <i>Sphingomonadaceae</i>  | <i>Novosphingobium</i> | 2,92535E-05     | 9,62066<br>E-05 | 0,876911 |
| <i>Bacteria</i> | <i>Proteobacteria</i>  | <i>Alphaproteobacteria</i> | <i>Rhizobiales</i>       | <i>Brucellaceae</i>       | <i>Ochrobactrum</i>    | 0,00041604<br>6 | 1,01915<br>E-05 | 0,000673 |
| <i>Bacteria</i> | <i>Bacteroidetes</i>   | <i>Bacteroidia</i>         | <i>Bacteroidales</i>     | <i>Porphyromonadaceae</i> | <i>Odoribacter</i>     | 0,00229779<br>8 | 2,68787<br>E-05 | 0,000195 |
| <i>Bacteria</i> | <i>Proteobacteria</i>  | <i>Alphaproteobacteria</i> | <i>Rhizobiales</i>       | <i>Bradyrhizobiaceae</i>  | <i>Oligotropha</i>     | 0               | 4,34457<br>E-06 | 0,063994 |
| <i>Bacteria</i> | <i>Actinobacteria</i>  | <i>Actinobacteria</i>      | <i>Coriobacteriales</i>  | <i>Coriobacteriaceae</i>  | <i>Olsenella</i>       | 8,26371E-06     | 9,33432<br>E-05 | 0,062473 |

|              |                |                     |                    |                    |                    |                 |                 |          |
|--------------|----------------|---------------------|--------------------|--------------------|--------------------|-----------------|-----------------|----------|
| Bacteria     | Firmicutes     | Clostridia          | Clostridiales      | Lachnospiraceae    | Oribacterium       | 0,00016467<br>2 | 0,00099<br>3875 | 0,016639 |
| Bacteria     | Actinobacteria | Actinobacteria      | Actinomycetales    | Intrasporangiaceae | Ornithinimicrobium | 2,04432E-05     | 2,19089<br>E-06 | 0,132342 |
| Bacteria     | Bacteroidetes  | Flavobacteriia      | Flavobacteriales   | Flavobacteriaceae  | Ornithobacterium   | 0,00012318<br>4 | 0,00019<br>818  | 0,67201  |
| Bacteria     | Firmicutes     | Clostridia          | Clostridiales      | Ruminococcaceae    | Oscillibacter      | 0,01587394<br>2 | 0,01483<br>5897 | 0,679708 |
| Bacteria     | Proteobacteria | Gammaproteobacteria | Pasteurellales     | Pasteurellaceae    | Otariodibacter     | 2,86735E-05     | 9,70645<br>E-06 | 0,861403 |
| Bacteria     | Firmicutes     | Clostridia          | Clostridiales      | Other              | Other              | 0,0201456       | 0,01604<br>7997 | 0,186449 |
| Bacteria     | Firmicutes     | Clostridia          | Clostridiales      | Ruminococcaceae    | Other              | 0,01493344<br>6 | 0,02433<br>3589 | 0,363722 |
| Bacteria     | Bacteroidetes  | Other               | Other              | Other              | Other              | 0,00106323<br>8 | 0,01088<br>7235 | 0,002249 |
| Bacteria     | Firmicutes     | Clostridia          | Clostridiales      | Lachnospiraceae    | Other              | 0,03386220<br>9 | 0,00947<br>4602 | 0,000711 |
| Bacteria     | Other          | Other               | Other              | Other              | Other              | 0,02435230<br>6 | 0,00753<br>3596 | 0,001703 |
| Unclassified | Other          | Other               | Other              | Other              | Other              | 0,00946586<br>2 | 0,00180<br>6894 | 0,001703 |
| Bacteria     | Firmicutes     | Bacilli             | Lactobacillales    | Enterococcaceae    | Other              | 0,00791662<br>1 | 0,00138<br>7831 | 0,001703 |
| Bacteria     | Bacteroidetes  | Bacteroidia         | Bacteroidales      | Other              | Other              | 0,00495965<br>2 | 0,00734<br>1611 | 0,508883 |
| Bacteria     | Firmicutes     | Other               | Other              | Other              | Other              | 0,00212490<br>7 | 0,00237<br>6888 | 0,457391 |
| Bacteria     | Bacteroidetes  | Sphingobacteriia    | Sphingobacteriales | Chitinophagaceae   | Other              | 0,00200345<br>7 | 0,00070<br>6989 | 0,013243 |
| Bacteria     | Bacteroidetes  | Bacteroidia         | Bacteroidales      | Porphyromonadaceae | Other              | 0,00124659      | 0,00683<br>6671 | 0,013243 |
| Bacteria     | Firmicutes     | Negativicutes       | Selenomonadales    | Veillonellaceae    | Other              | 0,00097348<br>2 | 0,00391<br>3863 | 0,057543 |
| Bacteria     | Firmicutes     | Clostridia          | Clostridiales      | Clostridiaceae 1   | Other              | 0,00083175<br>7 | 0,00030<br>4854 | 0,016639 |

|                     |                       |                            |                           |                              |              |             |             |          |
|---------------------|-----------------------|----------------------------|---------------------------|------------------------------|--------------|-------------|-------------|----------|
| <i>Bacteria</i>     | <i>Firmicutes</i>     | <i>Clostridia</i>          | <i>Clostridiales</i>      | <i>Peptostreptococcaceae</i> | <i>Other</i> | 0,000774828 | 0,000244876 | 0,003699 |
| <i>Bacteria</i>     | <i>Actinobacteria</i> | <i>Actinobacteria</i>      | <i>Actinomycetales</i>    | <i>Other</i>                 | <i>Other</i> | 0,000696558 | 6,99622E-05 | 0,000495 |
| <i>Bacteria</i>     | <i>Bacteroidetes</i>  | <i>Flavobacteriia</i>      | <i>Flavobacteriales</i>   | <i>Flavobacteriaceae</i>     | <i>Other</i> | 0,00062675  | 0,00871136  | 0,006432 |
| <i>Bacteria</i>     | <i>Proteobacteria</i> | <i>Deltaproteobacteria</i> | <i>Desulfovibrionales</i> | <i>Desulfovibrionaceae</i>   | <i>Other</i> | 0,000504303 | 0,000100472 | 0,000521 |
| <i>Bacteria</i>     | <i>Fusobacteria</i>   | <i>Fusobacteriia</i>       | <i>Fusobacteriales</i>    | <i>Leptotrichiaceae</i>      | <i>Other</i> | 0,000467015 | 0,000023359 | 0,011356 |
| <i>Bacteria</i>     | <i>Firmicutes</i>     | <i>Erysipelotrichia</i>    | <i>Erysipelotrichales</i> | <i>Erysipelotrichaceae</i>   | <i>Other</i> | 0,00037528  | 0,001302102 | 0,010475 |
| <i>Bacteria</i>     | <i>Proteobacteria</i> | <i>Alphaproteobacteria</i> | <i>Other</i>              | <i>Other</i>                 | <i>Other</i> | 0,000361368 | 0,000168613 | 0,738964 |
| <i>Bacteria</i>     | <i>Proteobacteria</i> | <i>Other</i>               | <i>Other</i>              | <i>Other</i>                 | <i>Other</i> | 0,000347396 | 0,000434698 | 0,1372   |
| <i>Bacteria</i>     | <i>Proteobacteria</i> | <i>Gammaproteobacteria</i> | <i>Enterobacteriales</i>  | <i>Enterobacteriaceae</i>    | <i>Other</i> | 0,00033715  | 0,000400217 | 0,408961 |
| <i>Bacteria</i>     | <i>Proteobacteria</i> | <i>Betaproteobacteria</i>  | <i>Neisseriales</i>       | <i>Neisseriaceae</i>         | <i>Other</i> | 0,00031669  | 0,000133541 | 0,015006 |
| <i>Unassignable</i> | <i>Other</i>          | <i>Other</i>               | <i>Other</i>              | <i>Other</i>                 | <i>Other</i> | 0,000164052 | 0           | 0,240955 |
| <i>Bacteria</i>     | <i>Proteobacteria</i> | <i>Gammaproteobacteria</i> | <i>Pasteurellales</i>     | <i>Pasteurellaceae</i>       | <i>Other</i> | 0,000157209 | 0,000108771 | 0,32175  |
| <i>Bacteria</i>     | <i>Bacteroidetes</i>  | <i>Bacteroidia</i>         | <i>Bacteroidales</i>      | <i>Prevotellaceae</i>        | <i>Other</i> | 0,00015075  | 0,003676419 | 0,000384 |
| <i>Archaea</i>      | <i>Other</i>          | <i>Other</i>               | <i>Other</i>              | <i>Other</i>                 | <i>Other</i> | 0,000139114 | 6,07902E-05 | 0,015006 |
| <i>Bacteria</i>     | <i>Proteobacteria</i> | <i>Gammaproteobacteria</i> | <i>Other</i>              | <i>Other</i>                 | <i>Other</i> | 0,000132816 | 7,05383E-05 | 0,408961 |
| <i>Bacteria</i>     | <i>Planctomycetes</i> | <i>Planctomycetia</i>      | <i>Planctomycetales</i>   | <i>Planctomycetaceae</i>     | <i>Other</i> | 0,000131638 | 0,001346548 | 0,001695 |
| <i>Bacteria</i>     | <i>Bacteroidetes</i>  | <i>Bacteroidia</i>         | <i>Bacteroidales</i>      | <i>Marinilabiaceae</i>       | <i>Other</i> | 0,0001249   | 0,000259682 | 0,066842 |
| <i>Bacteria</i>     | <i>Proteobacteria</i> | <i>Gammaproteobacteria</i> | <i>Pseudomonadales</i>    | <i>Moraxellaceae</i>         | <i>Other</i> | 0,000116488 | 1,86123E-05 | 0,015697 |

|                 |                       |                            |                           |                                        |              |                 |                 |          |
|-----------------|-----------------------|----------------------------|---------------------------|----------------------------------------|--------------|-----------------|-----------------|----------|
| <i>Bacteria</i> | <i>Actinobacteria</i> | <i>Actinobacteria</i>      | <i>Coriobacteriales</i>   | <i>Coriobacteriaceae</i>               | <i>Other</i> | 0,00011544<br>6 | 0,00028<br>8724 | 0,031728 |
| <i>Bacteria</i> | <i>Firmicutes</i>     | <i>Clostridia</i>          | <i>Clostridiales</i>      | <i>Clostridiales_Incertae Sedis XI</i> | <i>Other</i> | 0,00010104<br>7 | 5,80171<br>E-07 | 0,033134 |
| <i>Bacteria</i> | <i>Firmicutes</i>     | <i>Clostridia</i>          | <i>Other</i>              | <i>Other</i>                           | <i>Other</i> | 7,97182E-05     | 0,00012<br>4754 | 0,740743 |
| <i>Bacteria</i> | <i>Actinobacteria</i> | <i>Actinobacteria</i>      | <i>Actinomycetales</i>    | <i>Microbacteriaceae</i>               | <i>Other</i> | 7,47374E-05     | 3,65776<br>E-06 | 0,08083  |
| <i>Bacteria</i> | <i>Synergistetes</i>  | <i>Synergistia</i>         | <i>Synergistales</i>      | <i>Synergistaceae</i>                  | <i>Other</i> | 6,27505E-05     | 1,61566<br>E-05 | 0,35801  |
| <i>Bacteria</i> | <i>Proteobacteria</i> | <i>Alphaproteobacteria</i> | <i>Rhizobiales</i>        | <i>Hyphomicrobiaceae</i>               | <i>Other</i> | 0,00005402<br>2 | 2,90086<br>E-07 | 0,298379 |
| <i>Bacteria</i> | <i>Proteobacteria</i> | <i>Betaproteobacteria</i>  | <i>Burkholderiales</i>    | <i>Other</i>                           | <i>Other</i> | 0,00005146      | 0,00017<br>9094 | 0,018093 |
| <i>Bacteria</i> | <i>Proteobacteria</i> | <i>Betaproteobacteria</i>  | <i>Other</i>              | <i>Other</i>                           | <i>Other</i> | 0,00004042<br>9 | 0,00025<br>2542 | 0,059099 |
| <i>Bacteria</i> | <i>Proteobacteria</i> | <i>Alphaproteobacteria</i> | <i>Rhizobiales</i>        | <i>Other</i>                           | <i>Other</i> | 0,00003887<br>9 | 5,11929<br>E-06 | 0,229758 |
| <i>Archaea</i>  | <i>Crenarchaeota</i>  | <i>Thermoprotei</i>        | <i>Other</i>              | <i>Other</i>                           | <i>Other</i> | 3,68849E-05     | 9,37132<br>E-06 | 0,018426 |
| <i>Bacteria</i> | <i>Proteobacteria</i> | <i>Deltaproteobacteria</i> | <i>Other</i>              | <i>Other</i>                           | <i>Other</i> | 3,49028E-05     | 0,00060<br>8921 | 0,000637 |
| <i>Bacteria</i> | <i>Bacteroidetes</i>  | <i>Sphingobacteriia</i>    | <i>Sphingobacteriales</i> | <i>Sphingobacteriaceae</i>             | <i>Other</i> | 3,28427E-05     | 0,00088<br>0639 | 0,095688 |
| <i>Bacteria</i> | <i>Proteobacteria</i> | <i>Alphaproteobacteria</i> | <i>Rhizobiales</i>        | <i>Phyllobacteriaceae</i>              | <i>Other</i> | 3,13357E-05     | 2,74876<br>E-06 | 0,756733 |
| <i>Bacteria</i> | <i>Firmicutes</i>     | <i>Bacilli</i>             | <i>Other</i>              | <i>Other</i>                           | <i>Other</i> | 3,06185E-05     | 5,02519<br>E-05 | 0,183584 |
| <i>Bacteria</i> | <i>Lentisphaerae</i>  | <i>Other</i>               | <i>Other</i>              | <i>Other</i>                           | <i>Other</i> | 3,03771E-05     | 5,52568<br>E-07 | 0,298379 |
| <i>Bacteria</i> | <i>Firmicutes</i>     | <i>Bacilli</i>             | <i>Lactobacillales</i>    | <i>Other</i>                           | <i>Other</i> | 2,98316E-05     | 0,00052<br>7908 | 0,00634  |
| <i>Bacteria</i> | <i>Proteobacteria</i> | <i>Betaproteobacteria</i>  | <i>Burkholderiales</i>    | <i>Comamonadaceae</i>                  | <i>Other</i> | 2,44359E-05     | 3,42038<br>E-06 | 0,915168 |
| <i>Bacteria</i> | <i>Actinobacteria</i> | <i>Actinobacteria</i>      | <i>Actinomycetales</i>    | <i>Nocardioideaceae</i>                | <i>Other</i> | 2,37895E-05     | 0               | 0,240955 |
| <i>Bacteria</i> | <i>Proteobacteria</i> | <i>Alphaproteobacteria</i> | <i>Sphingomonadales</i>   | <i>Sphingomonadaceae</i>               | <i>Other</i> | 1,86026E-05     | 3,37978<br>E-06 | 0,915168 |

|                 |                        |                            |                           |                             |              |             |             |          |
|-----------------|------------------------|----------------------------|---------------------------|-----------------------------|--------------|-------------|-------------|----------|
| <i>Bacteria</i> | <i>Firmicutes</i>      | <i>Bacilli</i>             | <i>Lactobacillales</i>    | <i>Aerococcaceae</i>        | <i>Other</i> | 1,69478E-05 | 6,21013E-06 | 1        |
| <i>Bacteria</i> | <i>Verrucomicrobia</i> | <i>Opitutae</i>            | <i>Puniceococcales</i>    | <i>Puniceococcaceae</i>     | <i>Other</i> | 1,29761E-05 | 0,00000063  | 0,756733 |
| <i>Bacteria</i> | <i>Proteobacteria</i>  | <i>Alphaproteobacteria</i> | <i>Rhodospirillales</i>   | <i>Rhodospirillaceae</i>    | <i>Other</i> | 1,01664E-05 | 0,000078362 | 0,90784  |
| <i>Bacteria</i> | <i>Proteobacteria</i>  | <i>Alphaproteobacteria</i> | <i>Rhodospirillales</i>   | <i>Other</i>                | <i>Other</i> | 8,85959E-06 | 0           | 0,240955 |
| <i>Bacteria</i> | <i>Proteobacteria</i>  | <i>Deltaproteobacteria</i> | <i>Desulfovibrionales</i> | <i>Other</i>                | <i>Other</i> | 0,000008776 | 6,02593E-06 | 0,229758 |
| <i>Bacteria</i> | <i>Proteobacteria</i>  | <i>Gammaproteobacteria</i> | <i>Xanthomonadales</i>    | <i>Xanthomonadaceae</i>     | <i>Other</i> | 7,5694E-06  | 1,51061E-05 | 0,876911 |
| <i>Bacteria</i> | <i>Chlamydiae</i>      | <i>Chlamydiia</i>          | <i>Chlamydiales</i>       | <i>Parachlamydiaceae</i>    | <i>Other</i> | 7,5694E-06  | 0           | 0,240955 |
| <i>Bacteria</i> | <i>Firmicutes</i>      | <i>Bacilli</i>             | <i>Lactobacillales</i>    | <i>Carnobacteriaceae</i>    | <i>Other</i> | 7,54908E-06 | 0,000306338 | 0,00462  |
| <i>Bacteria</i> | <i>Proteobacteria</i>  | <i>Gammaproteobacteria</i> | <i>Pseudomonadales</i>    | <i>Other</i>                | <i>Other</i> | 7,09263E-06 | 7,01232E-07 | 0,132342 |
| <i>Bacteria</i> | <i>Firmicutes</i>      | <i>Bacilli</i>             | <i>Lactobacillales</i>    | <i>Lactobacillaceae</i>     | <i>Other</i> | 6,44519E-06 | 0,000176725 | 0,002907 |
| <i>Archaea</i>  | <i>Euryarchaeota</i>   | <i>Thermoplasmata</i>      | <i>Thermoplasmatales</i>  | <i>Other</i>                | <i>Other</i> | 5,9064E-06  | 1,48054E-06 | 0,562711 |
| <i>Bacteria</i> | <i>Proteobacteria</i>  | <i>Gammaproteobacteria</i> | <i>Chromatiales</i>       | <i>Other</i>                | <i>Other</i> | 5,40671E-06 | 0           | 0,240955 |
| <i>Bacteria</i> | <i>Actinobacteria</i>  | <i>Actinobacteria</i>      | <i>Actinomycetales</i>    | <i>Pseudonocardiaceae</i>   | <i>Other</i> | 3,68655E-06 | 0           | 0,240955 |
| <i>Bacteria</i> | <i>Proteobacteria</i>  | <i>Betaproteobacteria</i>  | <i>Burkholderiales</i>    | <i>Sutterellaceae</i>       | <i>Other</i> | 2,85225E-06 | 0,000003669 | 0,562711 |
| <i>Bacteria</i> | <i>Actinobacteria</i>  | <i>Actinobacteria</i>      | <i>Actinomycetales</i>    | <i>Propionibacteriaceae</i> | <i>Other</i> | 2,59194E-06 | 0           | 0,240955 |
| <i>Bacteria</i> | <i>Proteobacteria</i>  | <i>Gammaproteobacteria</i> | <i>Pseudomonadales</i>    | <i>Pseudomonadaceae</i>     | <i>Other</i> | 2,39677E-06 | 3,25361E-05 | 0,435428 |
| <i>Bacteria</i> | <i>Bacteroidetes</i>   | <i>Bacteroidia</i>         | <i>Bacteroidales</i>      | <i>Rikenellaceae</i>        | <i>Other</i> | 2,39368E-06 | 0           | 0,088427 |
| <i>Bacteria</i> | <i>Proteobacteria</i>  | <i>Betaproteobacteria</i>  | <i>Rhodocyclales</i>      | <i>Rhodocyclaceae</i>       | <i>Other</i> | 2,21686E-06 | 3,38309E-06 | 0,876911 |
| <i>Bacteria</i> | <i>Firmicutes</i>      | <i>Negativicutes</i>       | <i>Selenomonadales</i>    | <i>Other</i>                | <i>Other</i> | 1,84328E-06 | 0,000114573 | 0,00844  |
| <i>Bacteria</i> | <i>Proteobacteria</i>  | <i>Alphaproteobacteria</i> | <i>Rhodobacterales</i>    | <i>Rhodobacteraceae</i>     | <i>Other</i> | 1,84328E-06 | 1,93281E-05 | 0,649136 |
| <i>Bacteria</i> | <i>Chloroflexi</i>     | <i>Other</i>               | <i>Other</i>              | <i>Other</i>                | <i>Other</i> | 1,84328E-06 | 0           | 0,240955 |
| <i>Bacteria</i> | <i>Proteobacteria</i>  | <i>Alphaproteobacteria</i> | <i>Caulobacterales</i>    | <i>Caulobacteraceae</i>     | <i>Other</i> | 1,65883E-06 | 2,11443E-07 | 0,298379 |

|                 |                                  |                              |                           |                                          |              |             |                 |          |
|-----------------|----------------------------------|------------------------------|---------------------------|------------------------------------------|--------------|-------------|-----------------|----------|
| <i>Bacteria</i> | <i>Tenericutes</i>               | <i>Mollicutes</i>            | <i>Other</i>              | <i>Other</i>                             | <i>Other</i> | 1,1008E-06  | 0               | 0,240955 |
| <i>Bacteria</i> | <i>Actinobacteria</i>            | <i>Actinobacteria</i>        | <i>Actinomycetales</i>    | <i>Micrococcaceae</i>                    | <i>Other</i> | 5,50399E-07 | 2,83857<br>E-06 | 0,220572 |
| <i>Bacteria</i> | <i>Firmicutes</i>                | <i>Bacilli</i>               | <i>Bacillales</i>         | <i>Other</i>                             | <i>Other</i> | 5,50399E-07 | 2,07377<br>E-06 | 0,263359 |
| <i>Bacteria</i> | <i>Fusobacteria</i>              | <i>Fusobacteriia</i>         | <i>Fusobacteriales</i>    | <i>Fusobacteriaceae</i>                  | <i>Other</i> | 5,50399E-07 | 6,1439E<br>-07  | 0,845405 |
| <i>Bacteria</i> | <i>Proteobacteria</i>            | <i>Betaproteobacteria</i>    | <i>Burkholderiales</i>    | <i>Alcaligenaceae</i>                    | <i>Other</i> | 5,50399E-07 | 0               | 0,240955 |
| <i>Bacteria</i> | <i>Bacteroidetes</i>             | <i>Sphingobacteriia</i>      | <i>Sphingobacteriales</i> | <i>Other</i>                             | <i>Other</i> | 0           | 0,00038<br>4509 | 0,003268 |
| <i>Bacteria</i> | <i>Spirochaetes</i>              | <i>Spirochaetia</i>          | <i>Spirochaetales</i>     | <i>Spirochaetaceae</i>                   | <i>Other</i> | 0           | 0,00016<br>4305 | 0,003268 |
| <i>Bacteria</i> | <i>Firmicutes</i>                | <i>Negativicutes</i>         | <i>Selenomonadales</i>    | <i>Acidaminococcaceae</i>                | <i>Other</i> | 0           | 0,00013<br>859  | 0,001308 |
| <i>Bacteria</i> | <i>Firmicutes</i>                | <i>Clostridia</i>            | <i>Clostridiales</i>      | <i>Clostridiales_Incertae Sedis XIII</i> | <i>Other</i> | 0           | 0,00011<br>0013 | 0,00016  |
| <i>Bacteria</i> | <i>Actinobacteria</i>            | <i>Actinobacteria</i>        | <i>Other</i>              | <i>Other</i>                             | <i>Other</i> | 0           | 6,64059<br>E-05 | 0,11879  |
| <i>Bacteria</i> | <i>Proteobacteria</i>            | <i>Epsilonproteobacteria</i> | <i>Campylobacteriales</i> | <i>Other</i>                             | <i>Other</i> | 0           | 4,45188<br>E-05 | 0,003268 |
| <i>Bacteria</i> | <i>Spirochaetes</i>              | <i>Spirochaetia</i>          | <i>Spirochaetales</i>     | <i>Other</i>                             | <i>Other</i> | 0           | 3,62951<br>E-05 | 0,007557 |
| <i>Bacteria</i> | <i>Proteobacteria</i>            | <i>Alphaproteobacteria</i>   | <i>Rhizobiales</i>        | <i>Bradyrhizobiaceae</i>                 | <i>Other</i> | 0           | 2,86715<br>E-05 | 0,063994 |
| <i>Bacteria</i> | <i>Firmicutes</i>                | <i>Bacilli</i>               | <i>Lactobacillales</i>    | <i>Streptococcaceae</i>                  | <i>Other</i> | 0           | 8,81594<br>E-06 | 0,033134 |
| <i>Bacteria</i> | <i>Bacteroidetes</i>             | <i>Flavobacteriia</i>        | <i>Flavobacteriales</i>   | <i>Other</i>                             | <i>Other</i> | 0           | 8,66362<br>E-06 | 0,007557 |
| <i>Bacteria</i> | <i>Proteobacteria</i>            | <i>Epsilonproteobacteria</i> | <i>Other</i>              | <i>Other</i>                             | <i>Other</i> | 0           | 8,47936<br>E-06 | 0,033134 |
| <i>Bacteria</i> | <i>Bacteroidetes</i>             | <i>Cytophagia</i>            | <i>Cytophagales</i>       | <i>Other</i>                             | <i>Other</i> | 0           | 6,4481E<br>-06  | 0,033134 |
| <i>Bacteria</i> | <i>Firmicutes</i>                | <i>Bacilli</i>               | <i>Bacillales</i>         | <i>Planococcaceae</i>                    | <i>Other</i> | 0           | 4,84568<br>E-06 | 0,11879  |
| <i>Bacteria</i> | <i>Cyanobacteria/Chloroplast</i> | <i>Chloroplast</i>           | <i>Chloroplast</i>        | <i>Chloroplast</i>                       | <i>Other</i> | 0           | 3,50542<br>E-06 | 0,393769 |



|                 |                        |                              |                           |                                       |              |   |                 |          |
|-----------------|------------------------|------------------------------|---------------------------|---------------------------------------|--------------|---|-----------------|----------|
| <i>Bacteria</i> | <i>Proteobacteria</i>  | <i>Gammaproteobacteria</i>   | <i>Aeromonadales</i>      | <i>Succinivibrionaceae</i>            | <i>Other</i> | 0 | 2,98888<br>E-06 | 0,063994 |
| <i>Bacteria</i> | <i>Proteobacteria</i>  | <i>Epsilonproteobacteria</i> | <i>Campylobacterales</i>  | <i>Helicobacteraceae</i>              | <i>Other</i> | 0 | 2,80493<br>E-06 | 0,393769 |
| <i>Archaea</i>  | <i>Euryarchaeota</i>   | <i>Other</i>                 | <i>Other</i>              | <i>Other</i>                          | <i>Other</i> | 0 | 2,78865<br>E-06 | 0,215311 |
| <i>Bacteria</i> | <i>Proteobacteria</i>  | <i>Betaproteobacteria</i>    | <i>Burkholderiales</i>    | <i>Burkholderiales_incertae_sedis</i> | <i>Other</i> | 0 | 0,00000<br>2043 | 0,063994 |
| <i>Bacteria</i> | <i>Proteobacteria</i>  | <i>Gammaproteobacteria</i>   | <i>Aeromonadales</i>      | <i>Aeromonadaceae</i>                 | <i>Other</i> | 0 | 1,16034<br>E-06 | 0,393769 |
| <i>Bacteria</i> | <i>Firmicutes</i>      | <i>Bacilli</i>               | <i>Bacillales</i>         | <i>Staphylococcaceae</i>              | <i>Other</i> | 0 | 8,41455<br>E-07 | 0,215311 |
| <i>Bacteria</i> | <i>Verrucomicrobia</i> | <i>Other</i>                 | <i>Other</i>              | <i>Other</i>                          | <i>Other</i> | 0 | 7,10085<br>E-07 | 0,215311 |
| <i>Bacteria</i> | <i>Tenericutes</i>     | <i>Mollicutes</i>            | <i>Anaeroplasmatales</i>  | <i>Anaeroplasmataceae</i>             | <i>Other</i> | 0 | 7,01232<br>E-07 | 0,393769 |
| <i>Bacteria</i> | <i>Actinobacteria</i>  | <i>Actinobacteria</i>        | <i>Actinomycetales</i>    | <i>Corynebacteriaceae</i>             | <i>Other</i> | 0 | 6,34329<br>E-07 | 0,393769 |
| <i>Bacteria</i> | <i>Bacteroidetes</i>   | <i>Cytophagia</i>            | <i>Cytophagales</i>       | <i>Cytophagaceae</i>                  | <i>Other</i> | 0 | 0,00000<br>063  | 0,393769 |
| <i>Archaea</i>  | <i>Euryarchaeota</i>   | <i>Methanobacteria</i>       | <i>Methanobacteriales</i> | <i>Methanobacteriaceae</i>            | <i>Other</i> | 0 | 6,03093<br>E-07 | 0,393769 |
| <i>Bacteria</i> | <i>Firmicutes</i>      | <i>Clostridia</i>            | <i>Clostridiales</i>      | <i>Gracilibacteraceae</i>             | <i>Other</i> | 0 | 5,00085<br>E-07 | 0,215311 |
| <i>Bacteria</i> | <i>Proteobacteria</i>  | <i>Gammaproteobacteria</i>   | <i>Chromatiales</i>       | <i>Chromatiaceae</i>                  | <i>Other</i> | 0 | 4,94735<br>E-07 | 0,393769 |
| <i>Bacteria</i> | <i>Firmicutes</i>      | <i>Clostridia</i>            | <i>Clostridiales</i>      | <i>Incertae Sedis XI</i>              | <i>Other</i> | 0 | 4,22886<br>E-07 | 0,393769 |
| <i>Bacteria</i> | <i>Proteobacteria</i>  | <i>Deltaproteobacteria</i>   | <i>Desulfovibrionales</i> | <i>Desulfohalobiaceae</i>             | <i>Other</i> | 0 | 0,00000<br>042  | 0,393769 |
| <i>Bacteria</i> | <i>Actinobacteria</i>  | <i>Actinobacteria</i>        | <i>Actinomycetales</i>    | <i>Intrasporangiaceae</i>             | <i>Other</i> | 0 | 2,19089<br>E-07 | 0,393769 |
| <i>Bacteria</i> | <i>Proteobacteria</i>  | <i>Gammaproteobacteria</i>   | <i>Vibrionales</i>        | <i>Vibrionaceae</i>                   | <i>Other</i> | 0 | 2,19089<br>E-07 | 0,393769 |
| <i>Bacteria</i> | <i>Proteobacteria</i>  | <i>Alphaproteobacteria</i>   | <i>Caulobacterales</i>    | <i>Other</i>                          | <i>Other</i> | 0 | 2,11443<br>E-07 | 0,393769 |

|                 |                       |                            |                           |                                        |                           |                 |                 |          |
|-----------------|-----------------------|----------------------------|---------------------------|----------------------------------------|---------------------------|-----------------|-----------------|----------|
| <i>Bacteria</i> | <i>Proteobacteria</i> | <i>Alphaproteobacteria</i> | <i>Sphingomonadales</i>   | <i>Other</i>                           | <i>Other</i>              | 0               | 2,11443<br>E-07 | 0,393769 |
| <i>Bacteria</i> | <i>Firmicutes</i>     | <i>Clostridia</i>          | <i>Clostridiales</i>      | <i>Eubacteriaceae</i>                  | <i>Other</i>              | 0               | 0,00000<br>021  | 0,393769 |
| <i>Bacteria</i> | <i>Proteobacteria</i> | <i>Betaproteobacteria</i>  | <i>Burkholderiales</i>    | <i>Oxalobacteraceae</i>                | <i>Oxalobacter</i>        | 8,14606E-05     | 0,00021<br>6108 | 0,038646 |
| <i>Bacteria</i> | <i>Firmicutes</i>     | <i>Bacilli</i>             | <i>Bacillales</i>         | <i>Paenibacillaceae 1</i>              | <i>Paenibacillus</i>      | 1,46267E-06     | 0               | 0,240955 |
| <i>Bacteria</i> | <i>Proteobacteria</i> | <i>Alphaproteobacteria</i> | <i>Rhizobiales</i>        | <i>Brucellaceae</i>                    | <i>Paenochrobactrum</i>   | 3,13589E-05     | 0               | 0,240955 |
| <i>Bacteria</i> | <i>Bacteroidetes</i>  | <i>Bacteroidia</i>         | <i>Bacteroidales</i>      | <i>Porphyromonadaceae</i>              | <i>Paludibacter</i>       | 0,00105462<br>5 | 0,00174<br>8689 | 0,283074 |
| <i>Bacteria</i> | <i>Firmicutes</i>     | <i>Clostridia</i>          | <i>Clostridiales</i>      | <i>Ruminococcaceae</i>                 | <i>Papillibacter</i>      | 0,00008537      | 0,00021<br>3937 | 0,508138 |
| <i>Bacteria</i> | <i>Bacteroidetes</i>  | <i>Bacteroidia</i>         | <i>Bacteroidales</i>      | <i>Porphyromonadaceae</i>              | <i>Parabacteroides</i>    | 0,00215610<br>3 | 0,00055<br>1567 | 0,000524 |
| <i>Bacteria</i> | <i>Proteobacteria</i> | <i>Alphaproteobacteria</i> | <i>Rhodobacterales</i>    | <i>Rhodobacteraceae</i>                | <i>Paracoccus</i>         | 0,00039197<br>1 | 7,38055<br>E-06 | 0,088869 |
| <i>Bacteria</i> | <i>Actinobacteria</i> | <i>Actinobacteria</i>      | <i>Coriobacteriales</i>   | <i>Coriobacteriaceae</i>               | <i>Paraeggerthella</i>    | 1,84328E-06     | 1,99887<br>E-05 | 0,649136 |
| <i>Bacteria</i> | <i>Firmicutes</i>     | <i>Bacilli</i>             | <i>Lactobacillales</i>    | <i>Lactobacillaceae</i>                | <i>Paralactobacillus</i>  | 0               | 0,00014<br>2141 | 0,003268 |
| <i>Bacteria</i> | <i>Bacteroidetes</i>  | <i>Bacteroidia</i>         | <i>Bacteroidales</i>      | <i>Prevotellaceae</i>                  | <i>Paraprevotella</i>     | 0,00039670<br>5 | 0,01124<br>9129 | 0,00028  |
| <i>Bacteria</i> | <i>Bacteroidetes</i>  | <i>Sphingobacteriia</i>    | <i>Sphingobacteriales</i> | <i>Chitinophagaceae</i>                | <i>Parasegetibacter</i>   | 0               | 2,11443<br>E-07 | 0,393769 |
| <i>Bacteria</i> | <i>Firmicutes</i>     | <i>Clostridia</i>          | <i>Clostridiales</i>      | <i>Lachnospiraceae</i>                 | <i>Parasporobacterium</i> | 6,23129E-06     | 1,90108<br>E-05 | 0,245755 |
| <i>Bacteria</i> | <i>Proteobacteria</i> | <i>Betaproteobacteria</i>  | <i>Burkholderiales</i>    | <i>Sutterellaceae</i>                  | <i>Parasutterella</i>     | 0,00085338<br>3 | 8,42983<br>E-05 | 0,000273 |
| <i>Bacteria</i> | <i>Firmicutes</i>     | <i>Clostridia</i>          | <i>Clostridiales</i>      | <i>Clostridiales_Incertae Sedis XI</i> | <i>Parvimonas</i>         | 0,00012072<br>8 | 9,51084<br>E-06 | 0,071628 |
| <i>Bacteria</i> | <i>Proteobacteria</i> | <i>Gammaproteobacteria</i> | <i>Pasteurellales</i>     | <i>Pasteurellaceae</i>                 | <i>Pasteurella</i>        | 0,00104124<br>1 | 4,89688<br>E-05 | 0,000273 |
| <i>Bacteria</i> | <i>Proteobacteria</i> | <i>Gammaproteobacteria</i> | <i>Enterobacteriales</i>  | <i>Enterobacteriaceae</i>              | <i>Pectobacterium</i>     | 0               | 2,19089<br>E-05 | 0,393769 |
| <i>Bacteria</i> | <i>Firmicutes</i>     | <i>Bacilli</i>             | <i>Lactobacillales</i>    | <i>Lactobacillaceae</i>                | <i>Pediococcus</i>        | 0,00011196<br>2 | 6,3333E<br>-06  | 0,000246 |

|                 |                       |                            |                           |                                           |                                                  |                 |                 |          |
|-----------------|-----------------------|----------------------------|---------------------------|-------------------------------------------|--------------------------------------------------|-----------------|-----------------|----------|
| <i>Bacteria</i> | <i>Bacteroidetes</i>  | <i>Sphingobacteriia</i>    | <i>Sphingobacteriales</i> | <i>Sphingobacteriaceae</i>                | <i>Pedobacter</i>                                | 3,79775E-05     | 1,28933<br>E-06 | 0,756733 |
| <i>Bacteria</i> | <i>Proteobacteria</i> | <i>Betaproteobacteria</i>  | <i>Burkholderiales</i>    | <i>Comamonadaceae</i>                     | <i>Pelomonas</i>                                 | 0,00016083<br>4 | 2,98065<br>E-05 | 0,002829 |
| <i>Bacteria</i> | <i>Firmicutes</i>     | <i>Clostridia</i>          | <i>Clostridiales</i>      | <i>Syntrophomonadaceae</i>                | <i>Pelospora</i>                                 | 0               | 0,00000<br>021  | 0,393769 |
| <i>Bacteria</i> | <i>Firmicutes</i>     | <i>Clostridia</i>          | <i>Clostridiales</i>      | <i>Peptococcaceae 1</i>                   | <i>Peptococcus</i>                               | 0,00011184<br>7 | 0,00013<br>2848 | 0,677021 |
| <i>Bacteria</i> | <i>Firmicutes</i>     | <i>Clostridia</i>          | <i>Clostridiales</i>      | <i>Clostridiales_Incertae Sedis XI</i>    | <i>Peptoniphilus</i>                             | 0,00039020<br>9 | 2,29946<br>E-05 | 0,002997 |
| <i>Bacteria</i> | <i>Firmicutes</i>     | <i>Clostridia</i>          | <i>Clostridiales</i>      | <i>Peptostreptococcaceae</i>              | <i>Peptostreptococcaceae_i<br/>ncertae_sedis</i> | 4,63364E-05     | 0               | 0,088427 |
| <i>Bacteria</i> | <i>Firmicutes</i>     | <i>Clostridia</i>          | <i>Clostridiales</i>      | <i>Peptostreptococcaceae</i>              | <i>Peptostreptococcus</i>                        | 0,00020868<br>9 | 3,00219<br>E-05 | 0,004916 |
| <i>Bacteria</i> | <i>Proteobacteria</i> | <i>Gammaproteobacteria</i> | <i>Pseudomonadales</i>    | <i>Moraxellaceae</i>                      | <i>Perlucidibaca</i>                             | 1,37816E-05     | 0               | 0,240955 |
| <i>Bacteria</i> | <i>Bacteroidetes</i>  | <i>Bacteroidia</i>         | <i>Bacteroidales</i>      | <i>Porphyromonadaceae</i>                 | <i>Petrimonas</i>                                | 0               | 8,13877<br>E-05 | 0,007557 |
| <i>Bacteria</i> | <i>Firmicutes</i>     | <i>Negativicutes</i>       | <i>Selenomonadales</i>    | <i>Acidaminococcaceae</i>                 | <i>Phascolarctobacterium</i>                     | 0,00104463<br>5 | 0,04075<br>3749 | 0,00028  |
| <i>Bacteria</i> | <i>Proteobacteria</i> | <i>Alphaproteobacteria</i> | <i>Caulobacterales</i>    | <i>Caulobacteraceae</i>                   | <i>Phenylobacterium</i>                          | 1,84328E-06     | 0               | 0,240955 |
| <i>Bacteria</i> | <i>Bacteroidetes</i>  | <i>Bacteroidia</i>         | <i>Bacteroidales</i>      | <i>Bacteroidales"_incertae_sedi<br/>s</i> | <i>Phocaeicola</i>                               | 0               | 9,89471<br>E-07 | 0,393769 |
| <i>Bacteria</i> | <i>Proteobacteria</i> | <i>Gammaproteobacteria</i> | <i>Vibrionales</i>        | <i>Vibrionaceae</i>                       | <i>Photobacterium</i>                            | 1,38439E-05     | 0               | 0,088427 |
| <i>Bacteria</i> | <i>Proteobacteria</i> | <i>Alphaproteobacteria</i> | <i>Rhizobiales</i>        | <i>Phyllobacteriaceae</i>                 | <i>Phyllobacterium</i>                           | 0,00020873<br>2 | 0,00104<br>9156 | 0,408138 |
| <i>Bacteria</i> | <i>Actinobacteria</i> | <i>Actinobacteria</i>      | <i>Actinomycetales</i>    | <i>Nocardioideaceae</i>                   | <i>Pimelobacter</i>                              | 5,50399E-07     | 0               | 0,240955 |
| <i>Bacteria</i> | <i>Planctomycetes</i> | <i>Planctomycetia</i>      | <i>Planctomycetales</i>   | <i>Planctomycetaceae</i>                  | <i>Pirellula</i>                                 | 0               | 1,84189<br>E-07 | 0,393769 |
| <i>Bacteria</i> | <i>Bacteroidetes</i>  | <i>Flavobacteriia</i>      | <i>Flavobacteriales</i>   | <i>Flavobacteriaceae</i>                  | <i>Planobacterium</i>                            | 0,00031138<br>4 | 5,15328<br>E-06 | 0,000813 |
| <i>Bacteria</i> | <i>Firmicutes</i>     | <i>Bacilli</i>             | <i>Bacillales</i>         | <i>Planococcaceae</i>                     | <i>Planococcaceae_incertae<br/>_sedis</i>        | 0,00010821      | 1,99914<br>E-05 | 0,220572 |
| <i>Bacteria</i> | <i>Firmicutes</i>     | <i>Bacilli</i>             | <i>Bacillales</i>         | <i>Planococcaceae</i>                     | <i>Planomicrobium</i>                            | 6,89079E-06     | 0               | 0,240955 |
| <i>Bacteria</i> | <i>Bacteroidetes</i>  | <i>Cytophagia</i>          | <i>Cytophagales</i>       | <i>Cytophagaceae</i>                      | <i>Pontibacter</i>                               | 1,84328E-06     | 3,98284<br>E-06 | 0,876911 |
| <i>Bacteria</i> | <i>Proteobacteria</i> | <i>Alphaproteobacteria</i> | <i>Sphingomonadales</i>   | <i>Erythrobacteraceae</i>                 | <i>Porphyrobacter</i>                            | 1,84328E-06     | 0               | 0,240955 |

|                 |                       |                                           |                           |                              |                               |                 |                 |          |
|-----------------|-----------------------|-------------------------------------------|---------------------------|------------------------------|-------------------------------|-----------------|-----------------|----------|
| <i>Bacteria</i> | <i>Bacteroidetes</i>  | <i>Bacteroidia</i>                        | <i>Bacteroidales</i>      | <i>Porphyromonadaceae</i>    | <i>Porphyromonas</i>          | 0,00082151<br>1 | 0,00018<br>7014 | 0,026246 |
| <i>Bacteria</i> | <i>Bacteroidetes</i>  | <i>Bacteroidia</i>                        | <i>Bacteroidales</i>      | <i>Prevotellaceae</i>        | <i>Prevotella</i>             | 0,01318382<br>6 | 0,16814<br>5744 | 0,001703 |
| <i>Bacteria</i> | <i>Bacteroidetes</i>  | <i>Bacteroidetes"_incertae<br/>_sedis</i> | <i>Prolixibacter</i>      | <i>Prolixibacter</i>         | <i>Prolixibacter</i>          | 0               | 4,41183<br>E-06 | 0,11879  |
| <i>Bacteria</i> | <i>Actinobacteria</i> | <i>Actinobacteria</i>                     | <i>Actinomycetales</i>    | <i>Propionibacteriaceae</i>  | <i>Propionibacterium</i>      | 0,00285081<br>6 | 0,00024<br>2669 | 0,000278 |
| <i>Bacteria</i> | <i>Fusobacteria</i>   | <i>Fusobacteriia</i>                      | <i>Fusobacteriales</i>    | <i>Fusobacteriaceae</i>      | <i>Propionigenium</i>         | 0               | 1,16034<br>E-06 | 0,393769 |
| <i>Bacteria</i> | <i>Proteobacteria</i> | <i>Betaproteobacteria</i>                 | <i>Rhodocyclales</i>      | <i>Rhodocyclaceae</i>        | <i>Propionivibrio</i>         | 4,32537E-06     | 0               | 0,240955 |
| <i>Bacteria</i> | <i>Firmicutes</i>     | <i>Clostridia</i>                         | <i>Clostridiales</i>      | <i>Clostridiaceae 1</i>      | <i>Proteiniclasticum</i>      | 3,20675E-05     | 0               | 0,088427 |
| <i>Bacteria</i> | <i>Firmicutes</i>     | <i>Clostridia</i>                         | <i>Clostridiales</i>      | <i>Peptostreptococcaceae</i> | <i>Proteocatella</i>          | 0,00005089<br>9 | 4,60086<br>E-06 | 0,132342 |
| <i>Bacteria</i> | <i>Proteobacteria</i> | <i>Gammaproteobacteria</i>                | <i>Enterobacteriales</i>  | <i>Enterobacteriaceae</i>    | <i>Proteus</i>                | 1,18948E-05     | 0               | 0,240955 |
| <i>Bacteria</i> | <i>Proteobacteria</i> | <i>Gammaproteobacteria</i>                | <i>Enterobacteriales</i>  | <i>Enterobacteriaceae</i>    | <i>Providencia</i>            | 6,47984E-06     | 0               | 0,240955 |
| <i>Bacteria</i> | <i>Firmicutes</i>     | <i>Clostridia</i>                         | <i>Clostridiales</i>      | <i>Lachnospiraceae</i>       | <i>Pseudobutyrvibrio</i>      | 5,9064E-06      | 0,00021<br>5932 | 0,001292 |
| <i>Bacteria</i> | <i>Firmicutes</i>     | <i>Clostridia</i>                         | <i>Clostridiales</i>      | <i>Ruminococcaceae</i>       | <i>Pseudoflavonifractor</i>   | 0,00454789<br>6 | 0,00183<br>2117 | 0,002953 |
| <i>Bacteria</i> | <i>Proteobacteria</i> | <i>Gammaproteobacteria</i>                | <i>Pseudomonadales</i>    | <i>Pseudomonadaceae</i>      | <i>Pseudomonas</i>            | 0,00221467<br>2 | 5,44188<br>E-05 | 0,000195 |
| <i>Bacteria</i> | <i>Actinobacteria</i> | <i>Actinobacteria</i>                     | <i>Actinomycetales</i>    | <i>Pseudonocardiaceae</i>    | <i>Pseudonocardia</i>         | 3,40265E-06     | 0               | 0,088427 |
| <i>Bacteria</i> | <i>Firmicutes</i>     | <i>Clostridia</i>                         | <i>Clostridiales</i>      | <i>Eubacteriaceae</i>        | <i>Pseudoramibacter</i>       | 0               | 2,90086<br>E-07 | 0,393769 |
| <i>Bacteria</i> | <i>Bacteroidetes</i>  | <i>Sphingobacteriia</i>                   | <i>Sphingobacteriales</i> | <i>Sphingobacteriaceae</i>   | <i>Pseudosphingobacterium</i> | 0               | 2,85928<br>E-06 | 0,215311 |
| <i>Bacteria</i> | <i>Proteobacteria</i> | <i>Gammaproteobacteria</i>                | <i>Xanthomonadales</i>    | <i>Xanthomonadaceae</i>      | <i>Pseudoxanthomonas</i>      | 4,02014E-05     | 6,87385<br>E-05 | 0,782741 |
| <i>Bacteria</i> | <i>Fusobacteria</i>   | <i>Fusobacteriia</i>                      | <i>Fusobacteriales</i>    | <i>Fusobacteriaceae</i>      | <i>Psychrilyobacter</i>       | 1,90147E-05     | 0               | 0,240955 |
| <i>Bacteria</i> | <i>Proteobacteria</i> | <i>Gammaproteobacteria</i>                | <i>Pseudomonadales</i>    | <i>Moraxellaceae</i>         | <i>Psychrobacter</i>          | 0,00014681<br>4 | 8,87313<br>E-05 | 0,211448 |
| <i>Bacteria</i> | <i>Synergistetes</i>  | <i>Synergistia</i>                        | <i>Synergistales</i>      | <i>Synergistaceae</i>        | <i>Pyramidobacter</i>         | 2,32771E-05     | 0,00010<br>4708 | 0,014516 |
| <i>Bacteria</i> | <i>Proteobacteria</i> | <i>Betaproteobacteria</i>                 | <i>Burkholderiales</i>    | <i>Burkholderiaceae</i>      | <i>Ralstonia</i>              | 8,86745E-06     | 4,14974<br>E-05 | 0,311555 |

|                 |                                    |                                               |                                               |                                               |                                               |             |             |          |
|-----------------|------------------------------------|-----------------------------------------------|-----------------------------------------------|-----------------------------------------------|-----------------------------------------------|-------------|-------------|----------|
| <i>Bacteria</i> | <i>Proteobacteria</i>              | <i>Gammaproteobacteria</i>                    | <i>Enterobacteriales</i>                      | <i>Enterobacteriaceae</i>                     | <i>Raoultella</i>                             | 0,000034227 | 0           | 0,240955 |
| <i>Bacteria</i> | <i>Actinobacteria</i>              | <i>Actinobacteria</i>                         | <i>Actinomycetales</i>                        | <i>Micrococcaceae</i>                         | <i>Renibacterium</i>                          | 6,52285E-05 | 7,7467E-07  | 0,002267 |
| <i>Bacteria</i> | <i>Proteobacteria</i>              | <i>Gammaproteobacteria</i>                    | <i>Chromatiales</i>                           | <i>Chromatiaceae</i>                          | <i>Rheinheimera</i>                           | 0           | 8,33084E-06 | 0,11879  |
| <i>Bacteria</i> | <i>Proteobacteria</i>              | <i>Alphaproteobacteria</i>                    | <i>Rhizobiales</i>                            | <i>Rhizobiaceae</i>                           | <i>Rhizobium</i>                              | 0,000532441 | 0,000168251 | 0,006409 |
| <i>Bacteria</i> | <i>Proteobacteria</i>              | <i>Alphaproteobacteria</i>                    | <i>Rhodobacterales</i>                        | <i>Rhodobacteraceae</i>                       | <i>Rhodobacter</i>                            | 0           | 4,27294E-05 | 0,215311 |
| <i>Bacteria</i> | <i>Actinobacteria</i>              | <i>Actinobacteria</i>                         | <i>Actinomycetales</i>                        | <i>Nocardiaceae</i>                           | <i>Rhodococcus</i>                            | 0,000206968 | 9,87067E-05 | 0,127456 |
| <i>Bacteria</i> | <i>Proteobacteria</i>              | <i>Alphaproteobacteria</i>                    | <i>Rhodospirillales</i>                       | <i>Acetobacteraceae</i>                       | <i>Rhodovarius</i>                            | 2,92535E-06 | 0           | 0,240955 |
| <i>Bacteria</i> | <i>Bacteroidetes</i>               | <i>Bacteroidia</i>                            | <i>Bacteroidales</i>                          | <i>Rikenellaceae</i>                          | <i>Rikenella</i>                              | 2,56703E-05 | 0           | 0,240955 |
| <i>Bacteria</i> | <i>Firmicutes</i>                  | <i>Clostridia</i>                             | <i>Clostridiales</i>                          | <i>Lachnospiraceae</i>                        | <i>Robinsoniella</i>                          | 9,50807E-05 | 2,29884E-05 | 0,103085 |
| <i>Bacteria</i> | <i>Firmicutes</i>                  | <i>Clostridia</i>                             | <i>Clostridiales</i>                          | <i>Lachnospiraceae</i>                        | <i>Roseburia</i>                              | 0,00138735  | 0,019456389 | 0,000711 |
| <i>Bacteria</i> | <i>Proteobacteria</i>              | <i>Alphaproteobacteria</i>                    | <i>Rhodospirillales</i>                       | <i>Acetobacteraceae</i>                       | <i>Roseomonas</i>                             | 6,65059E-06 | 0           | 0,240955 |
| <i>Bacteria</i> | <i>Actinobacteria</i>              | <i>Actinobacteria</i>                         | <i>Actinomycetales</i>                        | <i>Micrococcaceae</i>                         | <i>Rothia</i>                                 | 0,004924722 | 0,006420408 | 0,159665 |
| <i>Bacteria</i> | <i>Proteobacteria</i>              | <i>Alphaproteobacteria</i>                    | <i>Rhodobacterales</i>                        | <i>Rhodobacteraceae</i>                       | <i>Rubellimicrobium</i>                       | 2,05899E-05 | 0           | 0,031967 |
| <i>Bacteria</i> | <i>Actinobacteria</i>              | <i>Actinobacteria</i>                         | <i>Rubrobacterales</i>                        | <i>Rubrobacteraceae</i>                       | <i>Rubrobacter</i>                            | 0,000011261 | 0           | 0,088427 |
| <i>Bacteria</i> | <i>Proteobacteria</i>              | <i>Gammaproteobacteria</i>                    | <i>Aeromonadales</i>                          | <i>Succinivibrionaceae</i>                    | <i>Ruminobacter</i>                           | 3,08223E-05 | 2,74296E-05 | 0,044544 |
| <i>Bacteria</i> | <i>Firmicutes</i>                  | <i>Clostridia</i>                             | <i>Clostridiales</i>                          | <i>Ruminococcaceae</i>                        | <i>Ruminococcus</i>                           | 0,003641119 | 0,007809513 | 0,057543 |
| <i>Bacteria</i> | <i>Firmicutes</i>                  | <i>Clostridia</i>                             | <i>Clostridiales</i>                          | <i>Lachnospiraceae</i>                        | <i>Ruminococcus2</i>                          | 0,001274479 | 0,001398366 | 0,56326  |
| <i>Bacteria</i> | <i>Firmicutes</i>                  | <i>Bacilli</i>                                | <i>Bacillales</i>                             | <i>Planococcaceae</i>                         | <i>Rummeliibacillus</i>                       | 0           | 2,19089E-07 | 0,393769 |
| <i>Bacteria</i> | <i>Candidatus Saccharibacteria</i> | <i>Saccharibacteria_genera_incertae_sedis</i> | <i>Saccharibacteria_genera_incertae_sedis</i> | <i>Saccharibacteria_genera_incertae_sedis</i> | <i>Saccharibacteria_genera_incertae_sedis</i> | 0,000687093 | 0,000219227 | 0,016449 |
| <i>Bacteria</i> | <i>Firmicutes</i>                  | <i>Clostridia</i>                             | <i>Clostridiales</i>                          | <i>Ruminococcaceae</i>                        | <i>Saccharofermentans</i>                     | 2,51707E-05 | 0,000044163 | 0,059099 |
| <i>Bacteria</i> | <i>Bacteroidetes</i>               | <i>Flavobacteriia</i>                         | <i>Flavobacteriales</i>                       | <i>Flavobacteriaceae</i>                      | <i>Salinimicrobium</i>                        | 2,16269E-06 | 0           | 0,240955 |

|          |                |                     |                     |                      |                       |                 |                 |          |
|----------|----------------|---------------------|---------------------|----------------------|-----------------------|-----------------|-----------------|----------|
| Bacteria | Firmicutes     | Clostridia          | Clostridiales       | Clostridiaceae 1     | Sarcina               | 1,9688E-06      | 5,06177<br>E-05 | 0,014074 |
| Bacteria | Proteobacteria | Betaproteobacteria  | Burkholderiales     | Comamonadaceae       | Schlegelella          | 1,39863E-05     | 0               | 0,031967 |
| Bacteria | Firmicutes     | Negativicutes       | Selenomonadales     | Veillonellaceae      | Schwartzia            | 4,95359E-06     | 0,00342<br>5093 | 0,002997 |
| Bacteria | Firmicutes     | Clostridia          | Halanaerobiales     | Halobacteroidaceae   | Selenihalanaerobacter | 0               | 1,16034<br>E-06 | 0,393769 |
| Bacteria | Firmicutes     | Negativicutes       | Selenomonadales     | Veillonellaceae      | Selenomonas           | 1,07998E-05     | 0,00366<br>9862 | 0,002204 |
| Bacteria | Firmicutes     | Erysipelotrichia    | Erysipelotrichales  | Erysipelotrichaceae  | Sharpea               | 1,17014E-05     | 0               | 0,240955 |
| Bacteria | Proteobacteria | Gammaproteobacteria | Alteromonadales     | Shewanellaceae       | Shewanella            | 2,88192E-05     | 0               | 0,240955 |
| Bacteria | Firmicutes     | Clostridia          | Clostridiales       | Lachnospiraceae      | Shuttleworthia        | 0               | 2,71755<br>E-06 | 0,063994 |
| Bacteria | Proteobacteria | Betaproteobacteria  | Neisseriales        | Neisseriaceae        | Simonsiella           | 0               | 3,80341<br>E-06 | 0,215311 |
| Bacteria | Proteobacteria | Betaproteobacteria  | Burkholderiales     | Comamonadaceae       | Simplicispira         | 0               | 1,41002<br>E-05 | 0,215311 |
| Bacteria | Actinobacteria | Actinobacteria      | Actinomycetales     | Micrococcaceae       | Sinomonas             | 0               | 2,57865<br>E-06 | 0,393769 |
| Bacteria | Actinobacteria | Actinobacteria      | Coriobacteriales    | Coriobacteriaceae    | Slackia               | 0               | 2,90086<br>E-07 | 0,393769 |
| Bacteria | Firmicutes     | Bacilli             | Bacillales          | Planococcaceae       | Solibacillus          | 0               | 3,68379<br>E-07 | 0,393769 |
| Bacteria | Actinobacteria | Actinobacteria      | Solirubrobacterales | Solirubrobacteraceae | Solirubrobacter       | 2,31679E-05     | 0               | 0,088427 |
| Bacteria | Bacteroidetes  | Flavobacteriia      | Flavobacteriales    | Flavobacteriaceae    | Soonwooa              | 1,29029E-05     | 2,11443<br>E-07 | 0,756733 |
| Bacteria | Chloroflexi    | Thermomicrobia      | Sphaerobacterales   | Sphaerobacteraceae   | Sphaerobacter         | 0               | 4,26069<br>E-06 | 0,393769 |
| Bacteria | Spirochaetes   | Spirochaetia        | Spirochaetales      | Spirochaetaceae      | Sphaerochaeta         | 0,00011119<br>8 | 0,00465<br>5045 | 0,000524 |
| Bacteria | Bacteroidetes  | Sphingobacteriia    | Sphingobacteriales  | Sphingobacteriaceae  | Sphingobacterium      | 0,00017545<br>3 | 0,00017<br>6939 | 0,264715 |
| Bacteria | Proteobacteria | Alphaproteobacteria | Sphingomonadales    | Sphingomonadaceae    | Sphingobium           | 0,00002610<br>2 | 7,7467E<br>-07  | 0,033134 |
| Bacteria | Proteobacteria | Alphaproteobacteria | Sphingomonadales    | Sphingomonadaceae    | Sphingomonas          | 0,0005245       | 0,00295<br>6599 | 0,457391 |
| Bacteria | Proteobacteria | Alphaproteobacteria | Sphingomonadales    | Sphingomonadaceae    | Sphingopyxis          | 2,92535E-06     | 0               | 0,240955 |

|          |                           |                           |                                    |                                    |                                    |             |             |          |
|----------|---------------------------|---------------------------|------------------------------------|------------------------------------|------------------------------------|-------------|-------------|----------|
| Bacteria | Proteobacteria            | Alphaproteobacteria       | Sphingomonadales                   | Sphingomonadaceae                  | Sphingosinicella                   | 1,55516E-05 | 0           | 0,240955 |
| Bacteria | Firmicutes                | Clostridia                | Clostridiales                      | Peptostreptococcaceae              | Sporacetigenium                    | 5,15997E-05 | 7,07145E-05 | 0,502247 |
| Bacteria | Firmicutes                | Clostridia                | Clostridiales                      | Ruminococcaceae                    | Sporobacter                        | 0,002762549 | 0,001692381 | 0,031803 |
| Bacteria | SR1                       | SR1_genera_incertae_sedis | SR1_genera_incertae_sedis          | SR1_genera_incertae_sedis          | SR1_genera_incertae_sedis          | 3,41247E-05 | 2,44379E-05 | 0,845405 |
| Bacteria | Firmicutes                | Bacilli                   | Bacillales                         | Staphylococcaceae                  | Staphylococcus                     | 0,00486108  | 0,002624935 | 0,016165 |
| Bacteria | Proteobacteria            | Gammaproteobacteria       | Xanthomonadales                    | Xanthomonadaceae                   | Stenotrophomonas                   | 0,000516755 | 0,000138182 | 0,007278 |
| Bacteria | Proteobacteria            | Gammaproteobacteria       | Xanthomonadales                    | Sinobacteraceae                    | Steroidobacter                     | 0           | 3,18627E-06 | 0,393769 |
| Bacteria | Fusobacteria              | Fusobacteriia             | Fusobacteriales                    | Leptotrichiaceae                   | Streptobacillus                    | 2,91963E-05 | 1,26866E-06 | 0,756733 |
| Bacteria | Firmicutes                | Bacilli                   | Lactobacillales                    | Streptococcaceae                   | Streptococcus                      | 0,010044047 | 0,009818849 | 0,457391 |
| Bacteria | Actinobacteria            | Actinobacteria            | Actinomycetales                    | Streptomycetaceae                  | Streptomyces                       | 3,25087E-05 | 7,64099E-05 | 0,749296 |
| Bacteria | Cyanobacteria/Chloroplast | Chloroplast               | Chloroplast                        | Chloroplast                        | Streptophyta                       | 0,001405774 | 0,000832014 | 0,002953 |
| Bacteria | Verrucomicrobia           | Subdivision5              | Subdivision5_genera_incertae_sedis | Subdivision5_genera_incertae_sedis | Subdivision5_genera_incertae_sedis | 0,000385579 | 0,000663453 | 0,741182 |
| Bacteria | Firmicutes                | Clostridia                | Clostridiales                      | Ruminococcaceae                    | Subdoligranulum                    | 2,85225E-06 | 9,64788E-06 | 0,193236 |
| Bacteria | Firmicutes                | Negativicutes             | Selenomonadales                    | Acidaminococcaceae                 | Succiniclasticum                   | 0           | 1,45043E-06 | 0,393769 |
| Bacteria | Proteobacteria            | Gammaproteobacteria       | Aeromonadales                      | Succinivibrionaceae                | Succinivibrio                      | 0,000830704 | 0,017056563 | 0,1372   |
| Bacteria | Proteobacteria            | Betaproteobacteria        | Burkholderiales                    | Sutterellaceae                     | Sutterella                         | 0,000123852 | 0,000294118 | 0,080216 |
| Bacteria | Proteobacteria            | Gammaproteobacteria       | Cardiobacteriales                  | Cardiobacteriaceae                 | Suttonella                         | 2,35137E-05 | 0           | 0,088427 |
| Bacteria | Synergistetes             | Synergistia               | Synergistales                      | Synergistaceae                     | Synergistes                        | 0,000191788 | 0           | 0,010871 |
| Bacteria | Firmicutes                | Clostridia                | Clostridiales                      | Lachnospiraceae                    | Syntrophococcus                    | 1,73549E-05 | 4,20653E-05 | 0,688915 |

|                 |                       |                            |                           |                                         |                         |             |             |          |
|-----------------|-----------------------|----------------------------|---------------------------|-----------------------------------------|-------------------------|-------------|-------------|----------|
| <i>Bacteria</i> | <i>Bacteroidetes</i>  | <i>Bacteroidia</i>         | <i>Bacteroidales</i>      | <i>Porphyromonadaceae</i>               | <i>Tannerella</i>       | 0,000193495 | 0,00016178  | 0,457391 |
| <i>Bacteria</i> | <i>Proteobacteria</i> | <i>Betaproteobacteria</i>  | <i>Burkholderiales</i>    | <i>Burkholderiales_incertae_sedis</i>   | <i>Tepidimonas</i>      | 1,57225E-05 | 2,27524E-05 | 1        |
| <i>Bacteria</i> | <i>Actinobacteria</i> | <i>Actinobacteria</i>      | <i>Actinomycetales</i>    | <i>Intrasporangiaceae</i>               | <i>Terracoccus</i>      | 0           | 1,20619E-06 | 0,393769 |
| <i>Bacteria</i> | <i>Bacteroidetes</i>  | <i>Sphingobacteriia</i>    | <i>Sphingobacteriales</i> | <i>Chitinophagaceae</i>                 | <i>Terrimonas</i>       | 0           | 0,000004216 | 0,393769 |
| <i>Bacteria</i> | <i>Actinobacteria</i> | <i>Actinobacteria</i>      | <i>Actinomycetales</i>    | <i>Propionibacteriaceae</i>             | <i>Tessaracoccus</i>    | 0,000028578 | 0,000000642 | 0,071628 |
| <i>Bacteria</i> | <i>Proteobacteria</i> | <i>Betaproteobacteria</i>  | <i>Rhodocyclales</i>      | <i>Rhodocyclaceae</i>                   | <i>Thauera</i>          | 0           | 0,000104633 | 0,215311 |
| <i>Archaea</i>  | <i>Euryarchaeota</i>  | <i>Thermoplasmata</i>      | <i>Thermoplasmatales</i>  | <i>Thermoplasmatales_incertae_sedis</i> | <i>Thermogymnomonas</i> | 0           | 5,24638E-05 | 0,063994 |
| <i>Bacteria</i> | <i>Proteobacteria</i> | <i>Gammaproteobacteria</i> | <i>Xanthomonadales</i>    | <i>Xanthomonadaceae</i>                 | <i>Thermomonas</i>      | 1,99658E-05 | 0           | 0,240955 |
| <i>Bacteria</i> | <i>Proteobacteria</i> | <i>Alphaproteobacteria</i> | <i>Rhodobacterales</i>    | <i>Rhodobacteraceae</i>                 | <i>Thioclava</i>        | 0           | 1,01835E-06 | 0,215311 |
| <i>Bacteria</i> | <i>Proteobacteria</i> | <i>Gammaproteobacteria</i> | <i>Thiotrichales</i>      | <i>Thiotrichaceae</i>                   | <i>Thiothrix</i>        | 0           | 4,05951E-05 | 0,11879  |
| <i>Bacteria</i> | <i>Firmicutes</i>     | <i>Clostridia</i>          | <i>Clostridiales</i>      | <i>Clostridiales_Incertae Sedis XI</i>  | <i>Tissierella</i>      | 6,14874E-05 | 1,84189E-07 | 0,298379 |
| <i>Bacteria</i> | <i>Proteobacteria</i> | <i>Gammaproteobacteria</i> | <i>Aeromonadales</i>      | <i>Aeromonadaceae</i>                   | <i>Tolumonas</i>        | 0           | 1,27821E-05 | 0,393769 |
| <i>Bacteria</i> | <i>Spirochaetes</i>   | <i>Spirochaetia</i>        | <i>Spirochaetales</i>     | <i>Spirochaetaceae</i>                  | <i>Treponema</i>        | 0,000834052 | 0,035544528 | 0,00028  |
| <i>Bacteria</i> | <i>Firmicutes</i>     | <i>Bacilli</i>             | <i>Lactobacillales</i>    | <i>Carnobacteriaceae</i>                | <i>Trichococcus</i>     | 5,01846E-05 | 4,59281E-05 | 0,76399  |
| <i>Bacteria</i> | <i>Actinobacteria</i> | <i>Actinobacteria</i>      | <i>Actinomycetales</i>    | <i>Actinomycetaceae</i>                 | <i>Trueperella</i>      | 0           | 5,85825E-05 | 0,063994 |
| <i>Bacteria</i> | <i>Actinobacteria</i> | <i>Actinobacteria</i>      | <i>Actinomycetales</i>    | <i>Corynebacteriaceae</i>               | <i>Turicella</i>        | 0           | 5,91332E-05 | 0,063994 |
| <i>Bacteria</i> | <i>Firmicutes</i>     | <i>Erysipelotrichia</i>    | <i>Erysipelotrichales</i> | <i>Erysipelotrichaceae</i>              | <i>Turicibacter</i>     | 0,000982986 | 0,000645882 | 0,1372   |
| <i>Bacteria</i> | <i>Proteobacteria</i> | <i>Betaproteobacteria</i>  | <i>Burkholderiales</i>    | <i>Oxalobacteraceae</i>                 | <i>Undibacterium</i>    | 0,000281504 | 4,53981E-05 | 0,00173  |
| <i>Bacteria</i> | <i>Tenericutes</i>    | <i>Mollicutes</i>          | <i>Mycoplasmatales</i>    | <i>Mycoplasmataceae</i>                 | <i>Ureaplasma</i>       | 0,000005504 | 0           | 0,240955 |



|                 |                       |                              |                          |                           |                         |                 |                 |          |
|-----------------|-----------------------|------------------------------|--------------------------|---------------------------|-------------------------|-----------------|-----------------|----------|
| <i>Bacteria</i> | <i>Proteobacteria</i> | <i>Betaproteobacteria</i>    | <i>Neisseriales</i>      | <i>Neisseriaceae</i>      | <i>Uruburuella</i>      | 1,71135E-05     | 0               | 0,240955 |
| <i>Bacteria</i> | <i>Firmicutes</i>     | <i>Bacilli</i>               | <i>Lactobacillales</i>   | <i>Enterococcaceae</i>    | <i>Vagococcus</i>       | 3,98297E-05     | 0               | 0,031967 |
| <i>Bacteria</i> | <i>Proteobacteria</i> | <i>Deltaproteobacteria</i>   | <i>Bdellovibrionales</i> | <i>Bdellovibrionaceae</i> | <i>Vampirovibrio</i>    | 0,00272525<br>6 | 0,00095<br>8666 | 0,004993 |
| <i>Bacteria</i> | <i>Proteobacteria</i> | <i>Betaproteobacteria</i>    | <i>Burkholderiales</i>   | <i>Comamonadaceae</i>     | <i>Variovorax</i>       | 3,30239E-06     | 0               | 0,240955 |
| <i>Bacteria</i> | <i>Firmicutes</i>     | <i>Negativicutes</i>         | <i>Selenomonadales</i>   | <i>Veillonellaceae</i>    | <i>Veillonella</i>      | 5,85568E-05     | 0,00015<br>7945 | 0,317468 |
| <i>Bacteria</i> | <i>Proteobacteria</i> | <i>Gammaproteobacteria</i>   | <i>Vibrionales</i>       | <i>Vibrionaceae</i>       | <i>Vibrio</i>           | 0               | 3,06724<br>E-06 | 0,393769 |
| <i>Bacteria</i> | <i>Lentisphaerae</i>  | <i>Lentisphaeria</i>         | <i>Victivallales</i>     | <i>Victivallaceae</i>     | <i>Victivallis</i>      | 3,63057E-05     | 1,06723<br>E-05 | 0,702752 |
| <i>Bacteria</i> | <i>Proteobacteria</i> | <i>Betaproteobacteria</i>    | <i>Neisseriales</i>      | <i>Neisseriaceae</i>      | <i>Vitreoscilla</i>     | 1,18128E-05     | 9,68338<br>E-06 | 0,876911 |
| <i>Bacteria</i> | <i>Bacteroidetes</i>  | <i>Flavobacteriia</i>        | <i>Flavobacteriales</i>  | <i>Flavobacteriaceae</i>  | <i>Wautersiella</i>     | 8,36892E-06     | 4,15122<br>E-05 | 0,567043 |
| <i>Bacteria</i> | <i>Bacteroidetes</i>  | <i>Flavobacteriia</i>        | <i>Flavobacteriales</i>  | <i>Flavobacteriaceae</i>  | <i>Weeksella</i>        | 3,65782E-05     | 0               | 0,240955 |
| <i>Bacteria</i> | <i>Firmicutes</i>     | <i>Bacilli</i>               | <i>Lactobacillales</i>   | <i>Leuconostocaceae</i>   | <i>Weissella</i>        | 0,00034403<br>7 | 3,37919<br>E-05 | 0,000637 |
| <i>Bacteria</i> | <i>Actinobacteria</i> | <i>Actinobacteria</i>        | <i>Actinomycetales</i>   | <i>Nocardiaceae</i>       | <i>Williamsia</i>       | 0               | 3,68426<br>E-06 | 0,215311 |
| <i>Bacteria</i> | <i>Proteobacteria</i> | <i>Gammaproteobacteria</i>   | <i>Xanthomonadales</i>   | <i>Xanthomonadaceae</i>   | <i>Wohlfahrtiimonas</i> | 0               | 0,00004<br>3726 | 0,215311 |
| <i>Bacteria</i> | <i>Proteobacteria</i> | <i>Epsilonproteobacteria</i> | <i>Campylobacterales</i> | <i>Helicobacteraceae</i>  | <i>Wolinella</i>        | 0               | 4,92014<br>E-06 | 0,11879  |
| <i>Bacteria</i> | <i>Proteobacteria</i> | <i>Gammaproteobacteria</i>   | <i>Xanthomonadales</i>   | <i>Xanthomonadaceae</i>   | <i>Xanthomonas</i>      | 0               | 3,87335<br>E-06 | 0,393769 |
| <i>Bacteria</i> | <i>Proteobacteria</i> | <i>Betaproteobacteria</i>    | <i>Burkholderiales</i>   | <i>Comamonadaceae</i>     | <i>Xenophilus</i>       | 1,84328E-06     | 4,16268<br>E-06 | 0,876911 |
| <i>Bacteria</i> | <i>Bacteroidetes</i>  | <i>Bacteroidia</i>           | <i>Bacteroidales</i>     | <i>Prevotellaceae</i>     | <i>Xylanibacter</i>     | 0               | 3,84431<br>E-05 | 0,003268 |
| <i>Bacteria</i> | <i>Actinobacteria</i> | <i>Actinobacteria</i>        | <i>Actinomycetales</i>   | <i>Micrococcaceae</i>     | <i>Yaniella</i>         | 4,32537E-06     | 0               | 0,240955 |
| <i>Bacteria</i> | <i>Actinobacteria</i> | <i>Actinobacteria</i>        | <i>Actinomycetales</i>   | <i>Micrococcaceae</i>     | <i>Zhihengliuella</i>   | 0               | 4,22886<br>E-07 | 0,393769 |

**Additional file 2. Nasal microbiota composition of piglets from farms MT and MC before (1) and after one cycle (2) or 5 cycles (3) without antimicrobial treatment removal. Mean relative abundance of each phylum (A) or family (B) in percentage for each sampling group.**

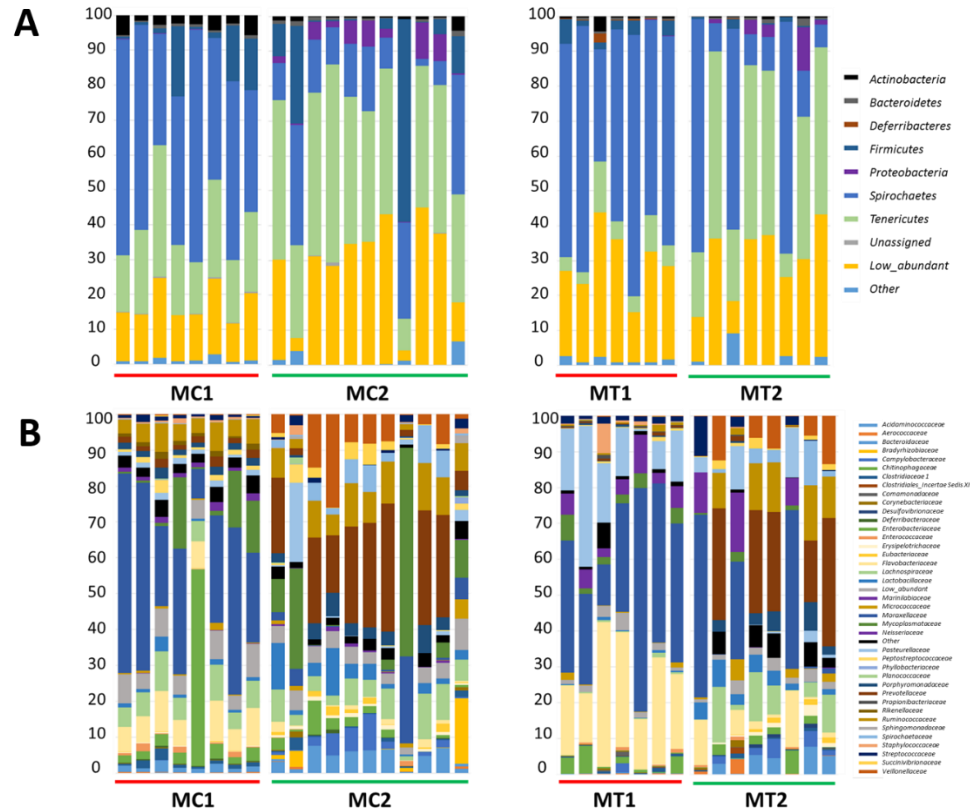

**Additional file 3. Frequencies of OTUs assigned at genus level from farm MT at the third sampling (MT3).**

| Domain   | Phylum          | Class               | Order              | Family                           | Genus               | Frequency   |
|----------|-----------------|---------------------|--------------------|----------------------------------|---------------------|-------------|
|          |                 |                     |                    |                                  |                     | MT3         |
| Bacteria | Firmicutes      | Bacilli             | Lactobacillales    | Aerococcaceae                    | Abiotrophia         | 4,60773E-06 |
| Bacteria | Actinobacteria  | Actinobacteria      | Actinomycetales    | Micrococcaceae                   | Acaricomes          | 3,13176E-07 |
| Bacteria | Firmicutes      | Clostridia          | Clostridiales      | Ruminococcaceae                  | Acetanaerobacterium | 0,001912339 |
| Bacteria | Firmicutes      | Clostridia          | Clostridiales      | Lachnospiraceae                  | Acetitomaculum      | 2,88336E-05 |
| Bacteria | Firmicutes      | Clostridia          | Clostridiales      | Ruminococcaceae                  | Acetivibrio         | 0,000189811 |
| Bacteria | Firmicutes      | Clostridia          | Clostridiales      | Peptostreptococcaceae            | Acetoanaerobium     | 1,79506E-06 |
| Bacteria | Proteobacteria  | Alphaproteobacteria | Rhodospirillales   | Acetobacteraceae                 | Acetobacter         | 1,48E-05    |
| Bacteria | Tenericutes     | Mollicutes          | Acholeplasmatales  | Acholeplasmataceae               | Acholeplasma        | 1,12397E-05 |
| Bacteria | Proteobacteria  | Betaproteobacteria  | Burkholderiales    | Alcaligenaceae                   | Achromobacter       | 1,79147E-06 |
| Bacteria | Firmicutes      | Clostridia          | Clostridiales      | Clostridiales_Incertae_Sedis_XII | Acidaminobacter     | 2,35088E-07 |
| Bacteria | Firmicutes      | Negativicutes       | Selenomonadales    | Acidaminococcaceae               | Acidaminococcus     | 0,000414379 |
| Bacteria | Proteobacteria  | Alphaproteobacteria | Rhodospirillales   | Acetobacteraceae                 | Acidicaldus         | 0           |
| Bacteria | Proteobacteria  | Alphaproteobacteria | Rhodospirillales   | Acetobacteraceae                 | Acidisoma           | 1,98061E-06 |
| Bacteria | Proteobacteria  | Betaproteobacteria  | Burkholderiales    | Comamonadaceae                   | Acidovorax          | 5,05201E-06 |
| Bacteria | Proteobacteria  | Gammaproteobacteria | Pseudomonadales    | Moraxellaceae                    | Acinetobacter       | 0,003416526 |
| Bacteria | Proteobacteria  | Gammaproteobacteria | Pasteurellales     | Pasteurellaceae                  | Actinobacillus      | 0,007520366 |
| Bacteria | Actinobacteria  | Actinobacteria      | Actinomycetales    | Actinomycetaceae                 | Actinobaculum       | 1,61261E-06 |
| Bacteria | Actinobacteria  | Actinobacteria      | Actinomycetales    | Actinomycetaceae                 | Actinomyces         | 8,55758E-05 |
| Bacteria | Actinobacteria  | Actinobacteria      | Coriobacteriales   | Coriobacteriaceae                | Adlercreutzia       | 1,52868E-05 |
| Bacteria | Proteobacteria  | Betaproteobacteria  | Burkholderiales    | Alcaligenaceae                   | Advenella           | 4,25639E-05 |
| Bacteria | Firmicutes      | Bacilli             | Bacillales         | Bacillaceae_1                    | Aeribacillus        | 0           |
| Bacteria | Firmicutes      | Bacilli             | Lactobacillales    | Aerococcaceae                    | Aerococcus          | 0,000773383 |
| Bacteria | Proteobacteria  | Gammaproteobacteria | Aeromonadales      | Aeromonadaceae                   | Aeromonas           | 5,67864E-06 |
| Bacteria | Proteobacteria  | Alphaproteobacteria | Rhizobiales        | Bradyrhizobiaceae                | Afipia              | 0,000306336 |
| Bacteria | Proteobacteria  | Gammaproteobacteria | Pasteurellales     | Pasteurellaceae                  | Aggregatibacter     | 7,28457E-06 |
| Bacteria | Actinobacteria  | Actinobacteria      | Actinomycetales    | Microbacteriaceae                | Agrococcus          | 1,70595E-06 |
| Bacteria | Verrucomicrobia | Verrucomicrobiae    | Verrucomicrobiales | Verrucomicrobiaceae              | Akkermansia         | 0,003390606 |
| Bacteria | Proteobacteria  | Betaproteobacteria  | Burkholderiales    | Comamonadaceae                   | Albidiferax         | 5,93542E-07 |
| Bacteria | Proteobacteria  | Betaproteobacteria  | Burkholderiales    | Alcaligenaceae                   | Alcaligenes         | 2,43695E-06 |
| Bacteria | Proteobacteria  | Gammaproteobacteria | Alteromonadales    | Alteromonadaceae                 | Alishewanella       | 2,68109E-06 |

|          |                 |                       |                     |                                   |                     |             |
|----------|-----------------|-----------------------|---------------------|-----------------------------------|---------------------|-------------|
| Bacteria | Bacteroidetes   | Bacteroidia           | Bacteroidales       | Rikenellaceae                     | Alistipes           | 0,012255597 |
| Bacteria | Firmicutes      | Clostridia            | Clostridiales       | Eubacteriaceae                    | Alkalibacter        | 2,7233E-06  |
| Bacteria | Firmicutes      | Bacilli               | Lactobacillales     | Carnobacteriaceae                 | Alkalibacterium     | 6,56134E-07 |
| Bacteria | Bacteroidetes   | Bacteroidia           | Bacteroidales       | Marinilabiaceae                   | Alkaliflexus        | 1,67955E-06 |
| Bacteria | Bacteroidetes   | Bacteroidia           | Bacteroidales       | Marinilabiliaceae                 | Alkalitalea         | 1,89479E-07 |
| Bacteria | Proteobacteria  | Gammaproteobacteria   | Pseudomonadales     | Moraxellaceae                     | Alkanindiges        | 1,84975E-05 |
| Bacteria | Firmicutes      | Negativicutes         | Selenomonadales     | Veillonellaceae                   | Allisonella         | 0,000190665 |
| Bacteria | Firmicutes      | Erysipelotrichia      | Erysipelotrichales  | Erysipelotrichaceae               | Allobaculum         | 1,7687E-07  |
| Bacteria | Firmicutes      | Bacilli               | Lactobacillales     | Carnobacteriaceae                 | Alloiococcus        | 0,000156445 |
| Bacteria | Bacteroidetes   | Bacteroidia           | Bacteroidales       | Prevotellaceae                    | Alloprevotella      | 0,008927882 |
| Bacteria | Proteobacteria  | Betaproteobacteria    | Neisseriales        | Neisseriaceae                     | Alysiella           | 6,56646E-05 |
| Bacteria | Proteobacteria  | Alphaproteobacteria   | Rhodobacterales     | Rhodobacteraceae                  | Amaricoccus         | 0           |
| Bacteria | Firmicutes      | Negativicutes         | Selenomonadales     | Veillonellaceae                   | Anaeroarcus         | 1,323E-07   |
| Bacteria | Firmicutes      | Bacilli               | Bacillales          | Bacillaceae 1                     | Anaerobacillus      | 9,45269E-05 |
| Bacteria | Firmicutes      | Clostridia            | Clostridiales       | Clostridiaceae 1                  | Anaerobacter        | 5,58108E-05 |
| Bacteria | Proteobacteria  | Gammaproteobacteria   | Aeromonadales       | Succinivibrionaceae               | Anaerobiospirillum  | 4,88727E-05 |
| Bacteria | Firmicutes      | Clostridia            | Clostridiales       | Clostridiales_Incertae_Sedis_XI   | Anaerococcus        | 0,000172905 |
| Bacteria | Firmicutes      | Clostridia            | Clostridiales       | Ruminococcaceae                   | Anaerofilum         | 3,71409E-05 |
| Bacteria | Firmicutes      | Clostridia            | Clostridiales       | Eubacteriaceae                    | Anaerofustis        | 1,17408E-05 |
| Bacteria | Firmicutes      | Negativicutes         | Selenomonadales     | Veillonellaceae                   | Anaeroglobus        | 7,90917E-07 |
| Bacteria | Proteobacteria  | Deltaproteobacteria   | Myxococcales        | Cystobacteraceae                  | Anaeromyxobacter    | 7,40719E-07 |
| Bacteria | Bacteroidetes   | Bacteroidia           | Bacteroidales       | Marinilabiaceae                   | Anaerophaga         | 0,0013806   |
| Bacteria | Tenericutes     | Mollicutes            | Anaeroplasmatales   | Anaeroplasmataceae                | Anaeroplasma        | 0,001630199 |
| Bacteria | Bacteroidetes   | Bacteroidia           | Bacteroidales       | Bacteroidaceae                    | Anaerorhabdus       | 2,7063E-05  |
| Bacteria | Firmicutes      | Clostridia            | Clostridiales       | Incertae_Sedis_XI                 | Anaerosphaera       | 2,72629E-06 |
| Bacteria | Firmicutes      | Clostridia            | Clostridiales       | Clostridiaceae 1                  | Anaerosporobacter   | 0,000190474 |
| Bacteria | Firmicutes      | Clostridia            | Clostridiales       | Lachnospiraceae                   | Anaerostipes        | 0,000956761 |
| Bacteria | Firmicutes      | Clostridia            | Clostridiales       | Ruminococcaceae                   | Anaerotruncus       | 0,000396041 |
| Bacteria | Firmicutes      | Negativicutes         | Selenomonadales     | Veillonellaceae                   | Anaerovibrio        | 0,004301503 |
| Bacteria | Firmicutes      | Clostridia            | Clostridiales       | Clostridiales_Incertae_Sedis_XIII | Anaerovorax         | 0,000338933 |
| Bacteria | Firmicutes      | Bacilli               | Bacillales          | Bacillaceae 1                     | Anoxybacillus       | 0           |
| Bacteria | Proteobacteria  | Betaproteobacteria    | Burkholderiales     | Burkholderiales_incertae_sedis    | Aquabacterium       | 2,9986E-06  |
| Bacteria | Actinobacteria  | Actinobacteria        | Actinomycetales     | Actinomycetaceae                  | Arcanobacterium     | 0,000115601 |
| Bacteria | Proteobacteria  | Epsilonproteobacteria | Campylobacterales   | Campylobacteraceae                | Arcobacter          | 9,17971E-05 |
| Bacteria | Armatimonadetes | Armatimonadetes_gp2   | Armatimonadetes_gp2 | Armatimonadetes_gp2               | Armatimonadetes_gp2 | 1,26039E-06 |

|                 |                        |                            |                            |                             |                            |             |
|-----------------|------------------------|----------------------------|----------------------------|-----------------------------|----------------------------|-------------|
| <i>Bacteria</i> | <i>Armatimonadetes</i> | <i>Armatimonadetes_gp5</i> | <i>Armatimonadetes_gp5</i> | <i>Armatimonadetes_gp5</i>  | <i>Armatimonadetes_gp5</i> | 0           |
| <i>Bacteria</i> | <i>Actinobacteria</i>  | <i>Actinobacteria</i>      | <i>Actinomycetales</i>     | <i>Micrococcaceae</i>       | <i>Arthrobacter</i>        | 3,19573E-05 |
| <i>Bacteria</i> | <i>Tenericutes</i>     | <i>Mollicutes</i>          | <i>Anaeroplasmatales</i>   | <i>Anaeroplasmataceae</i>   | <i>Asteroleplasma</i>      | 0,000520291 |
| <i>Bacteria</i> | <i>Proteobacteria</i>  | <i>Alphaproteobacteria</i> | <i>Caulobacterales</i>     | <i>Caulobacteraceae</i>     | <i>Asticcacaulis</i>       | 3,14512E-07 |
| <i>Bacteria</i> | <i>Firmicutes</i>      | <i>Bacilli</i>             | <i>Lactobacillales</i>     | <i>Carnobacteriaceae</i>    | <i>Atopobacter</i>         | 9,45558E-06 |
| <i>Bacteria</i> | <i>Actinobacteria</i>  | <i>Actinobacteria</i>      | <i>Coriobacteriales</i>    | <i>Coriobacteriaceae</i>    | <i>Atopobium</i>           | 2,42482E-06 |
| <i>Bacteria</i> | <i>Firmicutes</i>      | <i>Bacilli</i>             | <i>Lactobacillales</i>     | <i>Carnobacteriaceae</i>    | <i>Atopostipes</i>         | 1,71092E-05 |
| <i>Bacteria</i> | <i>Proteobacteria</i>  | <i>Alphaproteobacteria</i> | <i>Rhizobiales</i>         | <i>Aurantimonadaceae</i>    | <i>Aurantimonas</i>        | 0           |
| <i>Bacteria</i> | <i>Proteobacteria</i>  | <i>Betaproteobacteria</i>  | <i>Rhodocyclales</i>       | <i>Rhodocyclaceae</i>       | <i>Azoarcus</i>            | 1,43961E-06 |
| <i>Bacteria</i> | <i>Proteobacteria</i>  | <i>Gammaproteobacteria</i> | <i>Pseudomonadales</i>     | <i>Pseudomonadaceae</i>     | <i>Azomonas</i>            | 4,69764E-07 |
| <i>Bacteria</i> | <i>Proteobacteria</i>  | <i>Gammaproteobacteria</i> | <i>Pseudomonadales</i>     | <i>Pseudomonadaceae</i>     | <i>Azotobacter</i>         | 1,32081E-06 |
| <i>Bacteria</i> | <i>Firmicutes</i>      | <i>Bacilli</i>             | <i>Bacillales</i>          | <i>Bacillaceae 1</i>        | <i>Bacillus</i>            | 7,11495E-05 |
| <i>Bacteria</i> | <i>Bacteroidetes</i>   | <i>Bacteroidia</i>         | <i>Bacteroidales</i>       | <i>Bacteroidaceae</i>       | <i>Bacteroides</i>         | 0,091638302 |
| <i>Bacteria</i> | <i>Bacteroidetes</i>   | <i>Bacteroidia</i>         | <i>Bacteroidales</i>       | <i>Porphyromonadaceae</i>   | <i>Barnesiella</i>         | 0,013380466 |
| <i>Bacteria</i> | <i>Proteobacteria</i>  | <i>Gammaproteobacteria</i> | <i>Pasteurellales</i>      | <i>Pasteurellaceae</i>      | <i>Basfia</i>              | 1,00793E-06 |
| <i>Bacteria</i> | <i>Firmicutes</i>      | <i>Bacilli</i>             | <i>Lactobacillales</i>     | <i>Enterococcaceae</i>      | <i>Bavariicoccus</i>       | 1,92163E-06 |
| <i>Bacteria</i> | <i>Proteobacteria</i>  | <i>Betaproteobacteria</i>  | <i>Neisseriales</i>        | <i>Neisseriaceae</i>        | <i>Bergeriella</i>         | 3,3117E-05  |
| <i>Bacteria</i> | <i>Bacteroidetes</i>   | <i>Flavobacteriia</i>      | <i>Flavobacteriales</i>    | <i>Flavobacteriaceae</i>    | <i>Bergeyella</i>          | 0,10815999  |
| <i>Bacteria</i> | <i>Proteobacteria</i>  | <i>Gammaproteobacteria</i> | <i>Pasteurellales</i>      | <i>Pasteurellaceae</i>      | <i>Bibersteinia</i>        | 1,7234E-05  |
| <i>Bacteria</i> | <i>Actinobacteria</i>  | <i>Actinobacteria</i>      | <i>Bifidobacteriales</i>   | <i>Bifidobacteriaceae</i>   | <i>Bifidobacterium</i>     | 0,001571031 |
| <i>Bacteria</i> | <i>Proteobacteria</i>  | <i>Deltaproteobacteria</i> | <i>Desulfovibrionales</i>  | <i>Desulfovibrionaceae</i>  | <i>Bilophila</i>           | 0,000874161 |
| <i>Bacteria</i> | <i>Actinobacteria</i>  | <i>Actinobacteria</i>      | <i>Actinomycetales</i>     | <i>Geodermatophilaceae</i>  | <i>Blastococcus</i>        | 6,09754E-07 |
| <i>Bacteria</i> | <i>Planctomycetes</i>  | <i>Planctomycetia</i>      | <i>Planctomycetales</i>    | <i>Planctomycetaceae</i>    | <i>Blastopirellula</i>     | 4,11959E-07 |
| <i>Bacteria</i> | <i>Firmicutes</i>      | <i>Clostridia</i>          | <i>Clostridiales</i>       | <i>Lachnospiraceae</i>      | <i>Blautia</i>             | 0,006550138 |
| <i>Bacteria</i> | <i>Proteobacteria</i>  | <i>Betaproteobacteria</i>  | <i>Burkholderiales</i>     | <i>Alcaligenaceae</i>       | <i>Bordetella</i>          | 0,002945991 |
| <i>Bacteria</i> | <i>Proteobacteria</i>  | <i>Alphaproteobacteria</i> | <i>Rhizobiales</i>         | <i>Bradyrhizobiaceae</i>    | <i>Bosea</i>               | 0,000345679 |
| <i>Bacteria</i> | <i>Actinobacteria</i>  | <i>Actinobacteria</i>      | <i>Actinomycetales</i>     | <i>Dermabacteraceae</i>     | <i>Brachybacterium</i>     | 0,000108336 |
| <i>Bacteria</i> | <i>Proteobacteria</i>  | <i>Betaproteobacteria</i>  | <i>Burkholderiales</i>     | <i>Comamonadaceae</i>       | <i>Brachymonas</i>         | 1,48864E-05 |
| <i>Bacteria</i> | <i>Spirochaetes</i>    | <i>Spirochaetia</i>        | <i>Spirochaetales</i>      | <i>Brachyspiraceae</i>      | <i>Brachyspira</i>         | 1,09058E-06 |
| <i>Bacteria</i> | <i>Proteobacteria</i>  | <i>Alphaproteobacteria</i> | <i>Rhizobiales</i>         | <i>Bradyrhizobiaceae</i>    | <i>Bradyrhizobium</i>      | 5,91287E-06 |
| <i>Bacteria</i> | <i>Actinobacteria</i>  | <i>Actinobacteria</i>      | <i>Actinomycetales</i>     | <i>Brevibacteriaceae</i>    | <i>Brevibacterium</i>      | 3,494E-05   |
| <i>Bacteria</i> | <i>Proteobacteria</i>  | <i>Alphaproteobacteria</i> | <i>Caulobacterales</i>     | <i>Caulobacteraceae</i>     | <i>Brevundimonas</i>       | 5,3949E-06  |
| <i>Bacteria</i> | <i>Firmicutes</i>      | <i>Bacilli</i>             | <i>Bacillales</i>          | <i>Listeriaceae</i>         | <i>Brochothrix</i>         | 2,17603E-07 |
| <i>Bacteria</i> | <i>Actinobacteria</i>  | <i>Actinobacteria</i>      | <i>Actinomycetales</i>     | <i>Propionibacteriaceae</i> | <i>Brooklawnia</i>         | 1,2883E-06  |
| <i>Bacteria</i> | <i>Proteobacteria</i>  | <i>Alphaproteobacteria</i> | <i>Rhizobiales</i>         | <i>Brucellaceae</i>         | <i>Brucella</i>            | 2,14558E-06 |
| <i>Bacteria</i> | <i>Firmicutes</i>      | <i>Erysipelotrichia</i>    | <i>Erysipelotrichales</i>  | <i>Erysipelotrichaceae</i>  | <i>Bulleidia</i>           | 0,000855421 |

|          |                 |                       |                       |                              |                           |             |
|----------|-----------------|-----------------------|-----------------------|------------------------------|---------------------------|-------------|
| Bacteria | Proteobacteria  | Betaproteobacteria    | Burkholderiales       | Burkholderiaceae             | Burkholderia              | 3,84812E-06 |
| Bacteria | Firmicutes      | Clostridia            | Clostridiales         | Ruminococcaceae              | Butyricoccus              | 0,00227967  |
| Bacteria | Bacteroidetes   | Bacteroidia           | Bacteroidales         | Porphyromonadaceae           | Butyricimonas             | 0,002113362 |
| Bacteria | Firmicutes      | Clostridia            | Clostridiales         | Lachnospiraceae              | Butyrivibrio              | 0,000225843 |
| Bacteria | Proteobacteria  | Gammaproteobacteria   | Thiotrichales         | Thiotrichales_incertae_sedis | Caedibacter               | 4,02463E-06 |
| Bacteria | Proteobacteria  | Betaproteobacteria    | Burkholderiales       | Comamonadaceae               | Caenimonas                | 6,9994E-07  |
| Bacteria | Proteobacteria  | Epsilonproteobacteria | Campylobacterales     | Campylobacteraceae           | Campylobacter             | 0,007670846 |
| Bacteria | Proteobacteria  | Gammaproteobacteria   | Candidatus Carsonella | Candidatus Carsonella        | Candidatus Carsonella     | 2,93539E-06 |
| Bacteria | Proteobacteria  | Betaproteobacteria    | Burkholderiales       | Alcaligenaceae               | Candidimonas              | 1,04981E-06 |
| Bacteria | Bacteroidetes   | Flavobacteriia        | Flavobacteriales      | Flavobacteriaceae            | Capnocytophaga            | 3,10885E-05 |
| Bacteria | Firmicutes      | Bacilli               | Lactobacillales       | Carnobacteriaceae            | Carnobacterium            | 2,47235E-06 |
| Bacteria | Firmicutes      | Bacilli               | Bacillales            | Planococcaceae               | Caryophanon               | 3,39E-05    |
| Bacteria | Proteobacteria  | Betaproteobacteria    | Burkholderiales       | Alcaligenaceae               | Castellaniella            | 2,42521E-06 |
| Bacteria | Firmicutes      | Bacilli               | Lactobacillales       | Carnobacteriaceae            | Catelicoccus              | 8,24771E-07 |
| Bacteria | Firmicutes      | Erysipelotrichia      | Erysipelotrichales    | Erysipelotrichaceae          | Catenibacterium           | 0,001230274 |
| Bacteria | Firmicutes      | Clostridia            | Clostridiales         | Lachnospiraceae              | Catonella                 | 1,43478E-05 |
| Bacteria | Proteobacteria  | Alphaproteobacteria   | Caulobacterales       | Caulobacteraceae             | Caulobacter               | 0,000126173 |
| Bacteria | Actinobacteria  | Actinobacteria        | Actinomycetales       | Cellulomonadaceae            | Cellulomonas              | 0           |
| Bacteria | Firmicutes      | Clostridia            | Clostridiales         | Ruminococcaceae              | Cellulosibacter           | 4,39115E-06 |
| Bacteria | Firmicutes      | Clostridia            | Clostridiales         | Lachnospiraceae              | Cellulosilyticum          | 4,68211E-05 |
| Bacteria | Proteobacteria  | Gammaproteobacteria   | Pseudomonadales       | Pseudomonadaceae             | Cellvibrio                | 0           |
| Bacteria | Firmicutes      | Bacilli               | Bacillales            | Bacillaceae 2                | Cerasibacillus            | 0           |
| Bacteria | Verrucomicrobia | Opiritae              | Puniceicoccales       | Puniceicoccaceae             | Cericoccus                | 6,61427E-07 |
| Bacteria | Fusobacteria    | Fusobacteriia         | Fusobacteriales       | Fusobacteriaceae             | Cetobacterium             | 2,62431E-05 |
| Bacteria | Chlamydiae      | Chlamydiia            | Chlamydiales          | Chlamydiaceae                | Chlamydia                 | 1,83717E-06 |
| Bacteria | Bacteroidetes   | Flavobacteriia        | Flavobacteriales      | Flavobacteriaceae            | Chryseobacterium          | 7,02161E-05 |
| Bacteria | Proteobacteria  | Alphaproteobacteria   | Rhodobacterales       | Rhodobacteraceae             | Citreicella               | 6,28368E-06 |
| Bacteria | Proteobacteria  | Gammaproteobacteria   | Enterobacteriales     | Enterobacteriaceae           | Citrobacter               | 0,000143868 |
| Bacteria | Synergistetes   | Synergistia           | Synergistales         | Synergistaceae               | Cloacibacillus            | 0,000125557 |
| Bacteria | Bacteroidetes   | Flavobacteriia        | Flavobacteriales      | Flavobacteriaceae            | Cloacibacterium           | 5,22489E-06 |
| Bacteria | Firmicutes      | Clostridia            | Clostridiales         | Ruminococcaceae              | Clostridium III           | 9,21999E-05 |
| Bacteria | Firmicutes      | Clostridia            | Clostridiales         | Ruminococcaceae              | Clostridium IV            | 0,010333309 |
| Bacteria | Firmicutes      | Clostridia            | Clostridiales         | Clostridiaceae 1             | Clostridium sensu stricto | 0,005141397 |
| Bacteria | Firmicutes      | Clostridia            | Clostridiales         | Peptostreptococcaceae        | Clostridium XI            | 0,00506553  |
| Bacteria | Fusobacteria    | Fusobacteriia         | Fusobacteriales       | Fusobacteriaceae             | Clostridium XIX           | 5,20751E-06 |
| Bacteria | Firmicutes      | Clostridia            | Clostridiales         | Lachnospiraceae              | Clostridium XIVa          | 0,015633901 |

|          |                     |                     |                    |                     |                     |             |
|----------|---------------------|---------------------|--------------------|---------------------|---------------------|-------------|
| Bacteria | Firmicutes          | Clostridia          | Clostridiales      | Lachnospiraceae     | Clostridium XIVb    | 0,001181484 |
| Bacteria | Firmicutes          | Erysipelotrichia    | Erysipelotrichales | Erysipelotrichaceae | Clostridium XVIII   | 0,000553577 |
| Bacteria | Actinobacteria      | Actinobacteria      | Coriobacteriales   | Coriobacteriaceae   | Collinsella         | 0,000312929 |
| Bacteria | Proteobacteria      | Betaproteobacteria  | Burkholderiales    | Comamonadaceae      | Comamonas           | 4,89991E-05 |
| Bacteria | Proteobacteria      | Betaproteobacteria  | Neisseriales       | Neisseriaceae       | Conchiformibius     | 0           |
| Bacteria | Firmicutes          | Erysipelotrichia    | Erysipelotrichales | Erysipelotrichaceae | Coprobacillus       | 1,45474E-05 |
| Bacteria | Firmicutes          | Clostridia          | Clostridiales      | Lachnospiraceae     | Coprococcus         | 0,004920077 |
| Bacteria | Verrucomicrobia     | Opitutae            | Puniceococcales    | Puniceococcaceae    | Coraliomargarita    | 0,000236865 |
| Bacteria | Actinobacteria      | Actinobacteria      | Actinomycetales    | Corynebacteriaceae  | Corynebacterium     | 0,001642366 |
| Bacteria | Bacteroidetes       | Flavobacteriia      | Flavobacteriales   | Flavobacteriaceae   | Cruoricaptor        | 4,81073E-07 |
| Bacteria | Proteobacteria      | Betaproteobacteria  | Burkholderiales    | Burkholderiaceae    | Cupriavidus         | 1,11255E-06 |
| Bacteria | Actinobacteria      | Actinobacteria      | Actinomycetales    | Microbacteriaceae   | Curtobacterium      | 1,19968E-07 |
| Bacteria | Proteobacteria      | Betaproteobacteria  | Rhodocyclales      | Rhodocyclaceae      | Dechloromonas       | 1,23617E-06 |
| Bacteria | Firmicutes          | Clostridia          | Clostridiales      | Defluviitaleaceae   | Defluviitalea       | 8,52982E-05 |
| Bacteria | Deinococcus-Thermus | Deinococci          | Deinococcales      | Deinococcaceae      | Deinococcus         | 4,31884E-06 |
| Bacteria | Proteobacteria      | Betaproteobacteria  | Burkholderiales    | Comamonadaceae      | Delftia             | 0,000286813 |
| Bacteria | Actinobacteria      | Actinobacteria      | Actinomycetales    | Dermacoccaceae      | Dermacoccus         | 0           |
| Bacteria | Actinobacteria      | Actinobacteria      | Actinomycetales    | Dermatophilaceae    | Dermatophilus       | 4,83659E-05 |
| Bacteria | Firmicutes          | Bacilli             | Lactobacillales    | Carnobacteriaceae   | Desemzia            | 3,70359E-07 |
| Bacteria | Proteobacteria      | Deltaproteobacteria | Desulfobacterales  | Desulfobulbaceae    | Desulfobulbus       | 8,39774E-07 |
| Bacteria | Proteobacteria      | Deltaproteobacteria | Desulfovibrionales | Desulfovibrionaceae | Desulfomicrobium    | 6,72665E-05 |
| Bacteria | Proteobacteria      | Deltaproteobacteria | Desulfovibrionales | Desulfovibrionaceae | Desulfovibrio       | 0,001785476 |
| Bacteria | Firmicutes          | Clostridia          | Clostridiales      | Incertae Sedis XI   | Dethiosulfatibacter | 4,04511E-06 |
| Bacteria | Proteobacteria      | Alphaproteobacteria | Rhizobiales        | Hyphomicrobiaceae   | Devosia             | 3,59903E-07 |
| Bacteria | Firmicutes          | Negativicutes       | Selenomonadales    | Veillonellaceae     | Dialister           | 0,001522556 |
| Bacteria | Proteobacteria      | Betaproteobacteria  | Burkholderiales    | Comamonadaceae      | Diaphorobacter      | 6,33461E-06 |
| Bacteria | Actinobacteria      | Actinobacteria      | Actinomycetales    | Dietziaceae         | Dietzia             | 3,00726E-06 |
| Bacteria | Firmicutes          | Bacilli             | Lactobacillales    | Carnobacteriaceae   | Dolosigranulum      | 5,40318E-06 |
| Bacteria | Proteobacteria      | Alphaproteobacteria | Rhodospirillales   | Rhodospirillaceae   | Dongia              | 0           |
| Bacteria | Firmicutes          | Clostridia          | Clostridiales      | Lachnospiraceae     | Dorea               | 0,002451896 |
| Bacteria | Bacteroidetes       | Bacteroidia         | Bacteroidales      | Porphyromonadaceae  | Dysgonomonas        | 3,41667E-05 |
| Bacteria | Actinobacteria      | Actinobacteria      | Coriobacteriales   | Coriobacteriaceae   | Eggerthella         | 3,36848E-05 |
| Bacteria | Firmicutes          | Erysipelotrichia    | Erysipelotrichales | Erysipelotrichaceae | Eggerthia           | 6,55405E-06 |
| Bacteria | Bacteroidetes       | Flavobacteriia      | Flavobacteriales   | Flavobacteriaceae   | Elizabethkingia     | 0,0005774   |
| Bacteria | Elusimicrobia       | Elusimicrobia       | Elusimicrobiales   | Elusimicrobiaceae   | Elusimicrobium      | 8,38865E-05 |
| Bacteria | Bacteroidetes       | Flavobacteriia      | Flavobacteriales   | Flavobacteriaceae   | Empedobacter        | 1,12076E-05 |

|          |                  |                     |                    |                                 |                                        |             |
|----------|------------------|---------------------|--------------------|---------------------------------|----------------------------------------|-------------|
| Bacteria | Proteobacteria   | Gammaproteobacteria | Pseudomonadales    | Moraxellaceae                   | Enhydrobacter                          | 4,63058E-05 |
| Bacteria | Proteobacteria   | Gammaproteobacteria | Enterobacteriales  | Enterobacteriaceae              | Enterobacter                           | 2,06858E-05 |
| Bacteria | Firmicutes       | Bacilli             | Lactobacillales    | Enterococcaceae                 | Enterococcus                           | 0,00014701  |
| Bacteria | Actinobacteria   | Actinobacteria      | Coriobacteriales   | Coriobacteriaceae               | Enterorhabdus                          | 1,50689E-05 |
| Bacteria | Proteobacteria   | Gammaproteobacteria | Enterobacteriales  | Enterobacteriaceae              | Erwinia                                | 1,1238E-07  |
| Bacteria | Firmicutes       | Erysipelotrichia    | Erysipelotrichales | Erysipelotrichaceae             | Erysipelothrix                         | 9,34488E-05 |
| Bacteria | Firmicutes       | Erysipelotrichia    | Erysipelotrichales | Erysipelotrichaceae             | Erysipelotrichaceae_i<br>ncertae_sedis | 0,001427226 |
| Bacteria | Proteobacteria   | Gammaproteobacteria | Enterobacteriales  | Enterobacteriaceae              | Escherichia/Shigella                   | 0,007289037 |
| Bacteria | Firmicutes       | Clostridia          | Clostridiales      | Ruminococcaceae                 | Ethanoligenens                         | 4,19046E-05 |
| Bacteria | Firmicutes       | Clostridia          | Clostridiales      | Eubacteriaceae                  | Eubacterium                            | 0,003183625 |
| Bacteria | Firmicutes       | Bacilli             | Bacillales         | Bacillales_Incertae_Sedis_XII   | Exiguobacterium                        | 2,49174E-06 |
| Bacteria | Firmicutes       | Bacilli             | Lactobacillales    | Aerococcaceae                   | Facklamia                              | 0,000196841 |
| Bacteria | Firmicutes       | Clostridia          | Clostridiales      | Ruminococcaceae                 | Faecalibacterium                       | 0,023073249 |
| Bacteria | Firmicutes       | Clostridia          | Clostridiales      | Ruminococcaceae                 | Fastidiosipila                         | 4,81443E-05 |
| Bacteria | Fibrobacteres    | Fibrobacteria       | Fibrobacterales    | Fibrobacteraceae                | Fibrobacter                            | 0,000532675 |
| Bacteria | Firmicutes       | Clostridia          | Clostridiales      | Peptostreptococcaceae           | Filifactor                             | 1,86241E-05 |
| Bacteria | Bacteroidetes    | Sphingobacteriia    | Sphingobacteriales | Chitinophagaceae                | Filimonas                              | 3,38328E-06 |
| Bacteria | Firmicutes       | Clostridia          | Clostridiales      | Clostridiales_Incertae_Sedis_XI | Finegoldia                             | 4,33199E-06 |
| Bacteria | Bacteroidetes    | Sphingobacteriia    | Sphingobacteriales | Chitinophagaceae                | Flaviumibacter                         | 0           |
| Bacteria | Bacteroidetes    | Sphingobacteriia    | Sphingobacteriales | Chitinophagaceae                | Flavitalea                             | 3,54901E-07 |
| Bacteria | Bacteroidetes    | Flavobacteriia      | Flavobacteriales   | Flavobacteriaceae               | Flavobacterium                         | 2,88235E-05 |
| Bacteria | Firmicutes       | Clostridia          | Clostridiales      | Ruminococcaceae                 | Flavonifactor                          | 0,003223957 |
| Bacteria | Actinobacteria   | Actinobacteria      | Actinomycetales    | Propionibacteriaceae            | Friedmanniella                         | 2,45463E-06 |
| Bacteria | Fusobacteria     | Fusobacteriia       | Fusobacteriales    | Fusobacteriaceae                | Fusobacterium                          | 0,000942762 |
| Bacteria | Firmicutes       | Clostridia          | Clostridiales      | Clostridiales_Incertae_Sedis_XI | Gallicola                              | 3,24427E-05 |
| Bacteria | Actinobacteria   | Actinobacteria      | Bifidobacteriales  | Bifidobacteriaceae              | Gardnerella                            | 2,36455E-07 |
| Bacteria | Bacteroidetes    | Flavobacteriia      | Flavobacteriales   | Flavobacteriaceae               | Gelidibacter                           | 5,99838E-07 |
| Bacteria | Firmicutes       | Bacilli             | Bacillales         | Bacillales_Incertae_Sedis_XI    | Gemella                                | 6,27032E-05 |
| Bacteria | Planctomycetes   | Planctomycetia      | Planctomycetales   | Planctomycetaceae               | Gemmata                                | 0           |
| Bacteria | Gemmatimonadetes | Gemmatimonadetes    | Gemmatimonadales   | Gemmatimonadaceae               | Gemmatimonas                           | 0           |
| Bacteria | Firmicutes       | Clostridia          | Clostridiales      | Ruminococcaceae                 | Gemmiger                               | 0,007849898 |
| Bacteria | Actinobacteria   | Actinobacteria      | Actinomycetales    | Bogoriellaceae                  | Georgenia                              | 1,16665E-07 |
| Bacteria | Bacteroidetes    | Flavobacteriia      | Flavobacteriales   | Flavobacteriaceae               | Gillisia                               | 1,89479E-07 |
| Bacteria | Firmicutes       | Bacilli             | Lactobacillales    | Aerococcaceae                   | Globicatella                           | 0,000714656 |
| Bacteria | Actinobacteria   | Actinobacteria      | Actinomycetales    | Glycomycetaceae                 | Glycomyces                             | 0           |
| Bacteria | Actinobacteria   | Actinobacteria      | Actinomycetales    | Nocardiaceae                    | Gordonia                               | 0           |



|          |                           |                       |                    |                                  |                          |             |
|----------|---------------------------|-----------------------|--------------------|----------------------------------|--------------------------|-------------|
| Bacteria | Actinobacteria            | Actinobacteria        | Coriobacteriales   | Coriobacteriaceae                | Gordonibacter            | 9,85107E-06 |
| Bacteria | Acidobacteria             | Acidobacteria_Gp16    | Gp16               | Gp16                             | Gp16                     | 0           |
| Bacteria | Acidobacteria             | Acidobacteria_Gp6     | Gp6                | Gp6                              | Gp6                      | 0           |
| Bacteria | Cyanobacteria/Chloroplast | Cyanobacteria         | Family I           | Family I                         | GpI                      | 0           |
| Bacteria | Firmicutes                | Bacilli               | Lactobacillales    | Carnobacteriaceae                | Granulicatella           | 1,88497E-05 |
| Bacteria | Actinobacteria            | Actinobacteria        | Actinomycetales    | Propionibacteriaceae             | Granulicoccus            | 1,19968E-07 |
| Bacteria | Firmicutes                | Clostridia            | Clostridiales      | Clostridiales_Incertae Sedis XII | Guggenheimella           | 1,67241E-05 |
| Bacteria | Proteobacteria            | Gammaproteobacteria   | Pasteurellales     | Pasteurellaceae                  | Haemophilus              | 0,053232799 |
| Bacteria | Proteobacteria            | Gammaproteobacteria   | Enterobacteriales  | Enterobacteriaceae               | Hafnia                   | 1,62125E-06 |
| Bacteria | Firmicutes                | Bacilli               | Bacillales         | Bacillaceae 2                    | Halalkalibacillus        | 1,24711E-07 |
| Bacteria | Bacteroidetes             | Bacteroidia           | Bacteroidales      | Prevotellaceae                   | Hallella                 | 0,001057204 |
| Bacteria | Actinobacteria            | Actinobacteria        | Actinomycetales    | Ruaniaceae                       | Haloactinobacterium      | 1,55958E-06 |
| Bacteria | Firmicutes                | Bacilli               | Bacillales         | Bacillaceae 2                    | Halolactibacillus        | 1,2439E-06  |
| Bacteria | Proteobacteria            | Gammaproteobacteria   | Oceanospirillales  | Halomonadaceae                   | Halomonas                | 2,33577E-06 |
| Bacteria | Proteobacteria            | Alphaproteobacteria   | Rhizobiales        | Methylocystaceae                 | Hansschlegelia           | 1,08033E-06 |
| Bacteria | Actinobacteria            | Actinobacteria        | Actinomycetales    | Dermabacteraceae                 | Helcobacillus            | 7,80277E-06 |
| Bacteria | Firmicutes                | Clostridia            | Clostridiales      | Clostridiales_Incertae Sedis XI  | Helcococcus              | 0,000709202 |
| Bacteria | Proteobacteria            | Epsilonproteobacteria | Campylobacteriales | Helicobacteraceae                | Helicobacter             | 7,74393E-05 |
| Bacteria | Proteobacteria            | Betaproteobacteria    | Burkholderiales    | Oxalobacteraceae                 | Herbaspirillum           | 4,11664E-06 |
| Bacteria | Firmicutes                | Clostridia            | Clostridiales      | Lachnospiraceae                  | Hespellia                | 7,68593E-05 |
| Bacteria | Firmicutes                | Erysipelotrichia      | Erysipelotrichales | Erysipelotrichaceae              | Holdemania               | 0,001337175 |
| Bacteria | Firmicutes                | Clostridia            | Clostridiales      | Lachnospiraceae                  | Howardella               | 7,35148E-05 |
| Bacteria | Firmicutes                | Clostridia            | Clostridiales      | Ruminococcaceae                  | Hydrogenoanaerobacterium | 0,000118846 |
| Bacteria | Proteobacteria            | Betaproteobacteria    | Burkholderiales    | Comamonadaceae                   | Hydrogenophaga           | 0           |
| Bacteria | Proteobacteria            | Betaproteobacteria    | Hydrogenophilales  | Hydrogenophilaceae               | Hydrogenophilus          | 0           |
| Bacteria | Bacteroidetes             | Sphingobacteriia      | Sphingobacteriales | Chitinophagaceae                 | Hydrotalea               | 0           |
| Bacteria | Proteobacteria            | Alphaproteobacteria   | Rhizobiales        | Hyphomicrobiaceae                | Hyphomicrobium           | 4,09542E-06 |
| Bacteria | Actinobacteria            | Actinobacteria        | Acidimicrobiales   | Acidimicrobiaceae                | Ilumatobacter            | 9,35263E-06 |
| Bacteria | Proteobacteria            | Alphaproteobacteria   | Rhodospirillales   | Rhodospirillaceae                | Insolitispirillum        | 0,00026321  |
| Bacteria | Firmicutes                | Bacilli               | Lactobacillales    | Carnobacteriaceae                | Isobaculum               | 1,12596E-06 |
| Bacteria | Actinobacteria            | Actinobacteria        | Actinomycetales    | Promicromonosporaceae            | Isoptericola             | 8,97283E-07 |
| Bacteria | Actinobacteria            | Actinobacteria        | Actinomycetales    | Intrasporangiaceae               | Janibacter               | 4,97233E-06 |
| Bacteria | Proteobacteria            | Betaproteobacteria    | Burkholderiales    | Oxalobacteraceae                 | Janthinobacterium        | 3,71708E-06 |
| Bacteria | Firmicutes                | Bacilli               | Bacillales         | Staphylococcaceae                | Jeotgalicoccus           | 0,000156282 |
| Bacteria | Actinobacteria            | Actinobacteria        | Actinomycetales    | Jiangellaceae                    | Jiangella                | 5,91138E-07 |

|          |                 |                     |                    |                          |                                |             |
|----------|-----------------|---------------------|--------------------|--------------------------|--------------------------------|-------------|
| Bacteria | Actinobacteria  | Actinobacteria      | Actinomycetales    | Jonesiaceae              | Jonesia                        | 0           |
| Bacteria | Firmicutes      | Erysipelotrichia    | Erysipelotrichales | Erysipelotrichaceae      | Kandleria                      | 2,3531E-06  |
| Bacteria | Proteobacteria  | Betaproteobacteria  | Burkholderiales    | Alcaligenaceae           | Kerstesia                      | 1,9308E-05  |
| Bacteria | Proteobacteria  | Alphaproteobacteria | Rhodobacterales    | Rhodobacteraceae         | Ketogulonicigenium             | 2,646E-07   |
| Bacteria | Actinobacteria  | Actinobacteria      | Actinomycetales    | Kineosporiaceae          | Kineococcus                    | 1,87411E-06 |
| Bacteria | Proteobacteria  | Betaproteobacteria  | Neisseriales       | Neisseriaceae            | Kingella                       | 0,002972686 |
| Bacteria | Proteobacteria  | Gammaproteobacteria | Enterobacteriales  | Enterobacteriaceae       | Klebsiella                     | 0,00010271  |
| Bacteria | Actinobacteria  | Actinobacteria      | Actinomycetales    | Micrococcaceae           | Kocuria                        | 1,53988E-05 |
| Bacteria | Firmicutes      | Bacilli             | Bacillales         | Planococcaceae           | Kurthia                        | 0,000144274 |
| Bacteria | Actinobacteria  | Actinobacteria      | Actinomycetales    | Dermacoccaceae           | Kytococcus                     | 2,646E-07   |
| Bacteria | Proteobacteria  | Alphaproteobacteria | Rhizobiales        | Xanthobacteraceae        | Labrys                         | 9,89237E-07 |
| Bacteria | Firmicutes      | Bacilli             | Bacillales         | Thermoactinomycetaceae 1 | Laceyella                      | 2,49423E-07 |
| Bacteria | Firmicutes      | Clostridia          | Clostridiales      | Lachnospiraceae          | Lachnoanaerobaculum            | 2,85902E-05 |
| Bacteria | Firmicutes      | Clostridia          | Clostridiales      | Lachnospiraceae          | Lachnobacterium                | 5,00404E-06 |
| Bacteria | Firmicutes      | Clostridia          | Clostridiales      | Lachnospiraceae          | Lachnospira                    | 0,000756793 |
| Bacteria | Firmicutes      | Clostridia          | Clostridiales      | Lachnospiraceae          | Lachnospiraceae_incertae_sedis | 0,01503688  |
| Bacteria | Firmicutes      | Bacilli             | Lactobacillales    | Carnobacteriaceae        | Lacticigenium                  | 0           |
| Bacteria | Firmicutes      | Bacilli             | Lactobacillales    | Lactobacillaceae         | Lactobacillus                  | 0,024329282 |
| Bacteria | Firmicutes      | Bacilli             | Lactobacillales    | Streptococcaceae         | Lactococcus                    | 0,004350049 |
| Bacteria | Firmicutes      | Clostridia          | Clostridiales      | Lachnospiraceae          | Lactonifactor                  | 2,49859E-05 |
| Bacteria | Firmicutes      | Bacilli             | Lactobacillales    | Streptococcaceae         | Lactovum                       | 1,7824E-05  |
| Bacteria | Proteobacteria  | Betaproteobacteria  | Burkholderiales    | Comamonadaceae           | Lampropedia                    | 1,7687E-07  |
| Bacteria | Proteobacteria  | Deltaproteobacteria | Desulfovibrionales | Desulfovibrionaceae      | Lawsonia                       | 7,24624E-07 |
| Bacteria | Proteobacteria  | Gammaproteobacteria | Enterobacteriales  | Enterobacteriaceae       | Leclercia                      | 4,39324E-07 |
| Bacteria | Fusobacteria    | Fusobacteriia       | Fusobacteriales    | Leptotrichiaceae         | Leptotrichia                   | 3,65818E-05 |
| Bacteria | Actinobacteria  | Actinobacteria      | Actinomycetales    | Microbacteriaceae        | Leucobacter                    | 5,50676E-06 |
| Bacteria | Firmicutes      | Bacilli             | Lactobacillales    | Leuconostocaceae         | Leuconostoc                    | 0,000449669 |
| Bacteria | Proteobacteria  | Betaproteobacteria  | Burkholderiales    | Comamonadaceae           | Limnohabitans                  | 5,58802E-06 |
| Bacteria | Proteobacteria  | Gammaproteobacteria | Pasteurellales     | Pasteurellaceae          | Lonepinella                    | 1,7687E-07  |
| Bacteria | Chloroflexi     | Anaerolineae        | Anaerolineales     | Anaerolineaceae          | Longilinea                     | 3,06095E-06 |
| Bacteria | Proteobacteria  | Gammaproteobacteria | Xanthomonadales    | Xanthomonadaceae         | Luteimonas                     | 1,76683E-06 |
| Bacteria | Actinobacteria  | Actinobacteria      | Actinomycetales    | Propionibacteriaceae     | Luteococcus                    | 2,85361E-05 |
| Bacteria | Verrucomicrobia | Verrucomicrobiae    | Verrucomicrobiales | Verrucomicrobiaceae      | Luteolibacter                  | 2,35088E-07 |
| Bacteria | Firmicutes      | Clostridia          | Clostridiales      | Gracilibacteraceae       | Lutispora                      | 4,28421E-06 |
| Bacteria | Firmicutes      | Bacilli             | Bacillales         | Planococcaceae           | Lysinibacillus                 | 1,00623E-05 |

|          |                 |                     |                    |                                   |                    |             |
|----------|-----------------|---------------------|--------------------|-----------------------------------|--------------------|-------------|
| Bacteria | Proteobacteria  | Gammaproteobacteria | Xanthomonadales    | Xanthomonadaceae                  | Lysobacter         | 0           |
| Bacteria | Firmicutes      | Bacilli             | Bacillales         | Staphylococcaceae                 | Macrococcus        | 0           |
| Bacteria | Bacteroidetes   | Bacteroidia         | Bacteroidales      | Marinilabiliaceae                 | Mangroviflexus     | 1,12455E-06 |
| Bacteria | Proteobacteria  | Gammaproteobacteria | Pasteurellales     | Pasteurellaceae                   | Mannheimia         | 0,002377512 |
| Bacteria | Firmicutes      | Bacilli             | Bacillales         | Bacillaceae 2                     | Marinococcus       | 4,06803E-06 |
| Bacteria | Proteobacteria  | Gammaproteobacteria | Oceanospirillales  | Oceanospirillaceae                | Marinospirillum    | 3,75147E-06 |
| Bacteria | Actinobacteria  | Actinobacteria      | Actinomycetales    | Nocardiodaceae                    | Marmoricola        | 1,87906E-06 |
| Bacteria | Firmicutes      | Clostridia          | Clostridiales      | Lachnospiraceae                   | Marvinbryantia     | 5,87408E-05 |
| Bacteria | Proteobacteria  | Betaproteobacteria  | Burkholderiales    | Oxalobacteraceae                  | Massilia           | 1,68336E-06 |
| Bacteria | Firmicutes      | Negativicutes       | Selenomonadales    | Veillonellaceae                   | Megamonas          | 4,75534E-06 |
| Bacteria | Firmicutes      | Negativicutes       | Selenomonadales    | Veillonellaceae                   | Megasphaera        | 0,009434278 |
| Bacteria | Firmicutes      | Bacilli             | Lactobacillales    | Enterococcaceae                   | Melissococcus      | 5,42692E-07 |
| Bacteria | Bacteroidetes   | Cytophagia          | Cytophagales       | Cytophagaceae                     | Meniscus           | 1,89479E-07 |
| Bacteria | Proteobacteria  | Alphaproteobacteria | Rhizobiales        | Phyllobacteriaceae                | Mesorhizobium      | 4,1436E-05  |
| Bacteria | Actinobacteria  | Actinobacteria      | Bifidobacteriales  | Bifidobacteriaceae                | Metascardovia      | 1,94292E-06 |
| Archaea  | Euryarchaeota   | Methanobacteria     | Methanobacteriales | Methanobacteriaceae               | Methanobrevibacter | 0,000444732 |
| Archaea  | Euryarchaeota   | Methanomicrobia     | Methanosarcinales  | Methanosacetaceae                 | Methanosaeta       | 6,62075E-06 |
| Archaea  | Euryarchaeota   | Methanobacteria     | Methanobacteriales | Methanobacteriaceae               | Methanosphaera     | 1,97847E-07 |
| Bacteria | Proteobacteria  | Betaproteobacteria  | Methylophilales    | Methylophilaceae                  | Methylobacillus    | 0           |
| Bacteria | Proteobacteria  | Alphaproteobacteria | Rhizobiales        | Methylobacteriaceae               | Methylobacterium   | 4,52735E-06 |
| Bacteria | Proteobacteria  | Betaproteobacteria  | Methylophilales    | Methylophilaceae                  | Methylophilus      | 1,79807E-06 |
| Bacteria | Proteobacteria  | Alphaproteobacteria | Rhizobiales        | Hyphomicrobiaceae                 | Methylorhhabdus    | 2,24759E-07 |
| Bacteria | Actinobacteria  | Actinobacteria      | Actinomycetales    | Microbacteriaceae                 | Microbacterium     | 2,72856E-05 |
| Bacteria | Actinobacteria  | Actinobacteria      | Actinomycetales    | Nocardiaceae                      | Millisia           | 2,23517E-06 |
| Bacteria | Firmicutes      | Negativicutes       | Selenomonadales    | Veillonellaceae                   | Mitsuokella        | 0,000951785 |
| Bacteria | Firmicutes      | Clostridia          | Clostridiales      | Clostridiales_Incertae_Sedis_XIII | Mogibacterium      | 2,56272E-05 |
| Bacteria | Bacteroidetes   | Flavobacteriia      | Flavobacteriales   | Flavobacteriaceae                 | Moheibacter        | 1,19338E-06 |
| Bacteria | Proteobacteria  | Gammaproteobacteria | Pseudomonadales    | Moraxellaceae                     | Moraxella          | 0,110592342 |
| Bacteria | Firmicutes      | Clostridia          | Clostridiales      | Lachnospiraceae                   | Moryella           | 5,63116E-06 |
| Bacteria | Bacteroidetes   | Sphingobacteriia    | Sphingobacteriales | Sphingobacteriaceae               | Mucilagibacter     | 1,31085E-05 |
| Bacteria | Deferribacteres | Deferribacteres     | Deferribacterales  | Deferribacteraceae                | Mucispillum        | 0,000461103 |
| Bacteria | Firmicutes      | Clostridia          | Clostridiales      | Incertae_Sedis_XI                 | Murdochiella       | 3,55098E-05 |
| Bacteria | Actinobacteria  | Actinobacteria      | Actinomycetales    | Mycobacteriaceae                  | Mycobacterium      | 3,96592E-06 |
| Bacteria | Tenericutes     | Mollicutes          | Mycoplasmatales    | Mycoplasmataceae                  | Mycoplasma         | 0,002820879 |
| Bacteria | Bacteroidetes   | Flavobacteriia      | Flavobacteriales   | Flavobacteriaceae                 | Myroides           | 1,02751E-05 |

|          |                |                               |                    |                    |                    |             |
|----------|----------------|-------------------------------|--------------------|--------------------|--------------------|-------------|
| Bacteria | Actinobacteria | Actinobacteria                | Actinomycetales    | Nakamurellaceae    | Nakamurella        | 3,60111E-07 |
| Bacteria | Firmicutes     | Clostridia                    | Clostridiales      | Natranaerovirga    | Natranaerovirga    | 3,53741E-07 |
| Bacteria | Proteobacteria | Betaproteobacteria            | Burkholderiales    | Oxalobacteraceae   | Naxibacter         | 9,80466E-06 |
| Bacteria | Firmicutes     | Negativicutes                 | Selenomonadales    | Veillonellaceae    | Negativicoccus     | 1,97847E-07 |
| Bacteria | Proteobacteria | Betaproteobacteria            | Neisseriales       | Neisseriaceae      | Neisseria          | 0,019075648 |
| Bacteria | Actinobacteria | Actinobacteria                | Actinomycetales    | Micrococcaceae     | Nesterenkonia      | 2,26228E-06 |
| Bacteria | Proteobacteria | Gammaproteobacteria           | Pasteurellales     | Pasteurellaceae    | Nicoletella        | 1,21261E-07 |
| Bacteria | Proteobacteria | Alphaproteobacteria           | Rhizobiales        | Bradyrhizobiaceae  | Nitrobacter        | 0           |
| Bacteria | Proteobacteria | Betaproteobacteria            | Nitrosomonadales   | Nitrosomonadaceae  | Nitrospira         | 6,73329E-06 |
| Bacteria | Nitrospirae    | Nitrospira                    | Nitrospirales      | Nitrospiraceae     | Nitrospira         | 1,32192E-05 |
| Bacteria | Actinobacteria | Actinobacteria                | Actinomycetales    | Nocardiodaceae     | Nocardioides       | 7,57051E-07 |
| Bacteria | Firmicutes     | Bacilli                       | Bacillales         | Staphylococcaceae  | Nosocomiicoccus    | 3,96584E-05 |
| Bacteria | Proteobacteria | Alphaproteobacteria           | Sphingomonadales   | Sphingomonadaceae  | Novosphingobium    | 2,6411E-06  |
| Bacteria | Proteobacteria | Gammaproteobacteria           | Enterobacteriales  | Enterobacteriaceae | Obesumbacterium    | 1,24711E-07 |
| Bacteria | Proteobacteria | Gammaproteobacteria           | Aeromonadales      | Aeromonadaceae     | Oceanimonas        | 5,99838E-07 |
| Bacteria | Proteobacteria | Alphaproteobacteria           | Rhizobiales        | Brucellaceae       | Ochrobactrum       | 0,000312879 |
| Bacteria | Bacteroidetes  | Bacteroidia                   | Bacteroidales      | Porphyromonadaceae | Odoribacter        | 0,001958987 |
| Bacteria | Bacteroidetes  | Bacteroidetes" incertae sedis | Ohtaekwangia       | Ohtaekwangia       | Ohtaekwangia       | 8,79912E-06 |
| Bacteria | Actinobacteria | Actinobacteria                | Actinomycetales    | Microbacteriaceae  | Okibacterium       | 2,39488E-07 |
| Bacteria | Proteobacteria | Betaproteobacteria            | Burkholderiales    | Alcaligenaceae     | Oligella           | 1,04981E-06 |
| Bacteria | Proteobacteria | Alphaproteobacteria           | Rhizobiales        | Bradyrhizobiaceae  | Oligotropha        | 3,566E-07   |
| Bacteria | Actinobacteria | Actinobacteria                | Coriobacteriales   | Coriobacteriaceae  | Olsenella          | 8,82376E-05 |
| Bacteria | Firmicutes     | Clostridia                    | Clostridiales      | Lachnospiraceae    | Oribacterium       | 0,000597924 |
| Bacteria | Actinobacteria | Actinobacteria                | Actinomycetales    | Intrasporangiaceae | Ornithinimicrobium | 1,19338E-06 |
| Bacteria | Bacteroidetes  | Flavobacteriia                | Flavobacteriales   | Flavobacteriaceae  | Ornithobacterium   | 4,01987E-05 |
| Bacteria | Firmicutes     | Clostridia                    | Clostridiales      | Ruminococcaceae    | Oscillibacter      | 0,012080478 |
| Bacteria | Proteobacteria | Gammaproteobacteria           | Pasteurellales     | Pasteurellaceae    | Otariodibacter     | 6,36614E-05 |
| Bacteria | Firmicutes     | Clostridia                    | Clostridiales      | Ruminococcaceae    | Other              | 0,023462414 |
| Bacteria | Firmicutes     | Clostridia                    | Clostridiales      | Other              | Other              | 0,018992915 |
| Bacteria | Firmicutes     | Clostridia                    | Clostridiales      | Lachnospiraceae    | Other              | 0,017179887 |
| Bacteria | Bacteroidetes  | Sphingobacteriia              | Sphingobacteriales | Chitinophagaceae   | Other              | 0,003471067 |
| Bacteria | Other          | Other                         | Other              | Other              | Other              | 0,002708857 |
| Bacteria | Firmicutes     | Other                         | Other              | Other              | Other              | 0,00464866  |
| Bacteria | Firmicutes     | Bacilli                       | Lactobacillales    | Enterococcaceae    | Other              | 0,004106198 |
| Bacteria | Firmicutes     | Negativicutes                 | Selenomonadales    | Veillonellaceae    | Other              | 0,003875496 |
| Bacteria | Bacteroidetes  | Bacteroidia                   | Bacteroidales      | Porphyromonadaceae | Other              | 0,003699053 |

|              |                 |                     |                    |                                   |       |             |
|--------------|-----------------|---------------------|--------------------|-----------------------------------|-------|-------------|
| Bacteria     | Bacteroidetes   | Bacteroidia         | Bacteroidales      | Prevotellaceae                    | Other | 0,003111369 |
| Bacteria     | Bacteroidetes   | Bacteroidia         | Bacteroidales      | Other                             | Other | 0,002745992 |
| Bacteria     | Bacteroidetes   | Other               | Other              | Other                             | Other | 0,002741505 |
| Bacteria     | Bacteroidetes   | Flavobacteriia      | Flavobacteriales   | Flavobacteriaceae                 | Other | 0,002209802 |
| Bacteria     | Proteobacteria  | Alphaproteobacteria | Rhodospirillales   | Rhodospirillaceae                 | Other | 0,002071601 |
| Bacteria     | Proteobacteria  | Alphaproteobacteria | Rhodospirillales   | Other                             | Other | 0,001568236 |
| Bacteria     | Proteobacteria  | Gammaproteobacteria | Pasteurellales     | Pasteurellaceae                   | Other | 0,001494329 |
| Bacteria     | Firmicutes      | Bacilli             | Lactobacillales    | Aerococcaceae                     | Other | 0,001462921 |
| Bacteria     | Proteobacteria  | Betaproteobacteria  | Burkholderiales    | Other                             | Other | 0,000892288 |
| Bacteria     | Firmicutes      | Clostridia          | Clostridiales      | Clostridiales_Incertae Sedis XIII | Other | 0,000815668 |
| Bacteria     | Firmicutes      | Erysipelotrichia    | Erysipelotrichales | Erysipelotrichaceae               | Other | 0,00067816  |
| Bacteria     | Proteobacteria  | Deltaproteobacteria | Desulfovibrionales | Desulfovibrionaceae               | Other | 0,000595466 |
| Unclassified | Other           | Other               | Other              | Other                             | Other | 0,000592333 |
| Bacteria     | Proteobacteria  | Deltaproteobacteria | Other              | Other                             | Other | 0,000555976 |
| Bacteria     | Planctomycetes  | Planctomycetia      | Planctomycetales   | Planctomycetaceae                 | Other | 0,000512148 |
| Bacteria     | Bacteroidetes   | Flavobacteriia      | Flavobacteriales   | Other                             | Other | 0,000434328 |
| Bacteria     | Firmicutes      | Bacilli             | Bacillales         | Bacillaceae 1                     | Other | 0,000323123 |
| Bacteria     | Proteobacteria  | Betaproteobacteria  | Neisseriales       | Neisseriaceae                     | Other | 0,000299643 |
| Bacteria     | Actinobacteria  | Actinobacteria      | Coriobacteriales   | Coriobacteriaceae                 | Other | 0,000294396 |
| Bacteria     | Bacteroidetes   | Sphingobacteriia    | Sphingobacteriales | Sphingobacteriaceae               | Other | 0,000255323 |
| Bacteria     | Proteobacteria  | Betaproteobacteria  | Burkholderiales    | Sutterellaceae                    | Other | 0,000251773 |
| Bacteria     | Firmicutes      | Bacilli             | Lactobacillales    | Other                             | Other | 0,000232647 |
| Bacteria     | Proteobacteria  | Alphaproteobacteria | Other              | Other                             | Other | 0,000204901 |
| Bacteria     | Proteobacteria  | Gammaproteobacteria | Pseudomonadales    | Moraxellaceae                     | Other | 0,000203811 |
| Bacteria     | Proteobacteria  | Gammaproteobacteria | Enterobacteriales  | Enterobacteriaceae                | Other | 0,000198581 |
| Bacteria     | Proteobacteria  | Gammaproteobacteria | Other              | Other                             | Other | 0,000188608 |
| Bacteria     | Actinobacteria  | Actinobacteria      | Actinomycetales    | Other                             | Other | 0,000171436 |
| Bacteria     | Firmicutes      | Bacilli             | Lactobacillales    | Carnobacteriaceae                 | Other | 0,000140604 |
| Bacteria     | Proteobacteria  | Other               | Other              | Other                             | Other | 0,000109903 |
| Bacteria     | Firmicutes      | Clostridia          | Clostridiales      | Clostridiales_Incertae Sedis XI   | Other | 0,000106459 |
| Bacteria     | Verrucomicrobia | Opitutae            | Puniceococcales    | Puniceococcaceae                  | Other | 8,14409E-05 |
| Bacteria     | Proteobacteria  | Betaproteobacteria  | Other              | Other                             | Other | 7,96636E-05 |
| Bacteria     | Firmicutes      | Negativicutes       | Selenomonadales    | Acidaminococcaceae                | Other | 7,61761E-05 |
| Bacteria     | Bacteroidetes   | Bacteroidia         | Bacteroidales      | Marinilabiaceae                   | Other | 6,92969E-05 |
| Bacteria     | Fusobacteria    | Fusobacteriia       | Fusobacteriales    | Leptotrichiaceae                  | Other | 6,53654E-05 |
| Bacteria     | Firmicutes      | Clostridia          | Other              | Other                             | Other | 6,3211E-05  |

|          |                |                       |                    |                       |       |             |
|----------|----------------|-----------------------|--------------------|-----------------------|-------|-------------|
| Bacteria | Actinobacteria | Actinobacteria        | Bifidobacteriales  | Bifidobacteriaceae    | Other | 5,91148E-05 |
| Bacteria | Firmicutes     | Clostridia            | Clostridiales      | Peptococcaceae 1      | Other | 5,81455E-05 |
| Bacteria | Firmicutes     | Negativicutes         | Selenomonadales    | Other                 | Other | 5,69042E-05 |
| Bacteria | Firmicutes     | Clostridia            | Clostridiales      | Clostridiaceae 1      | Other | 5,40275E-05 |
| Bacteria | Lentisphaerae  | Other                 | Other              | Other                 | Other | 5,1341E-05  |
| Bacteria | Proteobacteria | Alphaproteobacteria   | Rhizobiales        | Other                 | Other | 4,98868E-05 |
| Bacteria | Spirochaetes   | Spirochaetia          | Spirochaetales     | Spirochaetaceae       | Other | 4,76015E-05 |
| Bacteria | Firmicutes     | Bacilli               | Lactobacillales    | Lactobacillaceae      | Other | 4,24476E-05 |
| Bacteria | Firmicutes     | Clostridia            | Clostridiales      | Incertae Sedis XI     | Other | 4,13367E-05 |
| Bacteria | Firmicutes     | Clostridia            | Clostridiales      | Gracilbacteraceae     | Other | 3,7104E-05  |
| Bacteria | Bacteroidetes  | Bacteroidia           | Bacteroidales      | Rikenellaceae         | Other | 3,312E-05   |
| Bacteria | Firmicutes     | Bacilli               | Other              | Other                 | Other | 3,25271E-05 |
| Bacteria | Proteobacteria | Betaproteobacteria    | Burkholderiales    | Comamonadaceae        | Other | 2,51143E-05 |
| Bacteria | Proteobacteria | Betaproteobacteria    | Burkholderiales    | Alcaligenaceae        | Other | 2,33602E-05 |
| Bacteria | Proteobacteria | Epsilonproteobacteria | Campylobacteriales | Other                 | Other | 2,08777E-05 |
| Bacteria | Firmicutes     | Bacilli               | Bacillales         | Other                 | Other | 1,7717E-05  |
| Bacteria | Firmicutes     | Clostridia            | Clostridiales      | Peptostreptococcaceae | Other | 1,63231E-05 |
| Archaea  | Other          | Other                 | Other              | Other                 | Other | 1,34014E-05 |
| Bacteria | Proteobacteria | Deltaproteobacteria   | Desulfovibrionales | Other                 | Other | 1,20657E-05 |
| Bacteria | Actinobacteria | Actinobacteria        | Actinomycetales    | Microbacteriaceae     | Other | 1,14066E-05 |
| Bacteria | Actinobacteria | Actinobacteria        | Actinomycetales    | Propionibacteriaceae  | Other | 1,12707E-05 |
| Bacteria | Actinobacteria | Actinobacteria        | Actinomycetales    | Micrococcaceae        | Other | 1,02283E-05 |
| Bacteria | Firmicutes     | Bacilli               | Lactobacillales    | Streptococcaceae      | Other | 1,00232E-05 |
| Bacteria | Fusobacteria   | Fusobacteriia         | Fusobacteriales    | Fusobacteriaceae      | Other | 9,25737E-06 |
| Bacteria | Spirochaetes   | Spirochaetia          | Spirochaetales     | Other                 | Other | 9,22536E-06 |
| Bacteria | Proteobacteria | Alphaproteobacteria   | Rhizobiales        | Brucellaceae          | Other | 7,81617E-06 |
| Bacteria | Proteobacteria | Gammaproteobacteria   | Pseudomonadales    | Other                 | Other | 5,2227E-06  |
| Bacteria | Proteobacteria | Betaproteobacteria    | Nitrosomonadales   | Nitrosomonadaceae     | Other | 5,11784E-06 |
| Bacteria | Actinobacteria | Actinobacteria        | Actinomycetales    | Corynebacteriaceae    | Other | 4,30003E-06 |
| Bacteria | Proteobacteria | Alphaproteobacteria   | Sphingomonadales   | Other                 | Other | 3,719E-06   |
| Bacteria | Proteobacteria | Alphaproteobacteria   | Rhizobiales        | Phyllobacteriaceae    | Other | 3,61352E-06 |
| Bacteria | Actinobacteria | Actinobacteria        | Other              | Other                 | Other | 3,52248E-06 |
| Bacteria | Proteobacteria | Epsilonproteobacteria | Other              | Other                 | Other | 3,38783E-06 |
| Archaea  | Euryarchaeota  | Other                 | Other              | Other                 | Other | 3,35107E-06 |
| Archaea  | Crenarchaeota  | Thermoprotei          | Other              | Other                 | Other | 2,30538E-06 |
| Bacteria | Firmicutes     | Clostridia            | Clostridiales      | Eubacteriaceae        | Other | 2,27745E-06 |

|          |                           |                       |                    |                                |       |             |
|----------|---------------------------|-----------------------|--------------------|--------------------------------|-------|-------------|
| Bacteria | Proteobacteria            | Alphaproteobacteria   | Rhizobiales        | Bradyrhizobiaceae              | Other | 1,95552E-06 |
| Bacteria | Actinobacteria            | Actinobacteria        | Actinomycetales    | Intrasporangiaceae             | Other | 1,90042E-06 |
| Bacteria | Proteobacteria            | Betaproteobacteria    | Burkholderiales    | Burkholderiales_incertae_sedis | Other | 1,89958E-06 |
| Bacteria | Bacteroidetes             | Sphingobacteriia      | Sphingobacteriales | Other                          | Other | 1,77002E-06 |
| Bacteria | Firmicutes                | Bacilli               | Bacillales         | Bacillaceae 2                  | Other | 1,69856E-06 |
| Bacteria | Proteobacteria            | Betaproteobacteria    | Burkholderiales    | Oxalobacteraceae               | Other | 1,60405E-06 |
| Bacteria | Synergistetes             | Synergistia           | Synergistales      | Synergistaceae                 | Other | 1,42899E-06 |
| Bacteria | Firmicutes                | Bacilli               | Bacillales         | Staphylococcaceae              | Other | 1,279E-06   |
| Bacteria | Proteobacteria            | Gammaproteobacteria   | Aeromonadales      | Succinivibrionaceae            | Other | 1,27563E-06 |
| Bacteria | Cyanobacteria/Chloroplast | Chloroplast           | Chloroplast        | Chloroplast                    | Other | 1,18357E-06 |
| Bacteria | Tenericutes               | Mollicutes            | Other              | Other                          | Other | 1,17544E-06 |
| Bacteria | Proteobacteria            | Alphaproteobacteria   | Sphingomonadales   | Sphingomonadaceae              | Other | 1,1747E-06  |
| Bacteria | Actinobacteria            | Actinobacteria        | Actinomycetales    | Nocardiodiaceae                | Other | 1,16906E-06 |
| Bacteria | Bacteroidetes             | Cytophagia            | Cytophagales       | Other                          | Other | 1,05901E-06 |
| Bacteria | Proteobacteria            | Betaproteobacteria    | Methylophilales    | Methylophilaceae               | Other | 9,261E-07   |
| Bacteria | Actinobacteria            | Actinobacteria        | Actinomycetales    | Dermacoccaceae                 | Other | 9,15442E-07 |
| Bacteria | Firmicutes                | Bacilli               | Bacillales         | Planococcaceae                 | Other | 7,65635E-07 |
| Bacteria | Proteobacteria            | Betaproteobacteria    | Rhodocyclales      | Rhodocyclaceae                 | Other | 7,18066E-07 |
| Bacteria | Verrucomicrobia           | Verrucomicrobiae      | Verrucomicrobiales | Verrucomicrobiaceae            | Other | 7,07852E-07 |
| Bacteria | Proteobacteria            | Deltaproteobacteria   | Desulfovibrionales | Desulfohalobiaceae             | Other | 7,07481E-07 |
| Bacteria | Proteobacteria            | Alphaproteobacteria   | Rhodobacterales    | Rhodobacteraceae               | Other | 7,03883E-07 |
| Bacteria | Actinobacteria            | Actinobacteria        | Actinomycetales    | Dermatophilaceae               | Other | 5,99838E-07 |
| Bacteria | Proteobacteria            | Alphaproteobacteria   | Rhizobiales        | Hyphomicrobiaceae              | Other | 5,91786E-07 |
| Bacteria | Actinobacteria            | Actinobacteria        | Acidimicrobiales   | Other                          | Other | 4,79871E-07 |
| Bacteria | Actinobacteria            | Actinobacteria        | Actinomycetales    | Dermabacteraceae               | Other | 4,25115E-07 |
| Bacteria | Verrucomicrobia           | Other                 | Other              | Other                          | Other | 4,24568E-07 |
| Bacteria | Proteobacteria            | Gammaproteobacteria   | Pseudomonadales    | Pseudomonadaceae               | Other | 3,8616E-07  |
| Bacteria | Proteobacteria            | Gammaproteobacteria   | Xanthomonadales    | Xanthomonadaceae               | Other | 2,39935E-07 |
| Bacteria | Bacteroidetes             | Cytophagia            | Cytophagales       | Cytophagaceae                  | Other | 2,35088E-07 |
| Bacteria | Actinobacteria            | Actinobacteria        | Actinomycetales    | Actinomycetaceae               | Other | 2,24759E-07 |
| Bacteria | Chloroflexi               | Other                 | Other              | Other                          | Other | 2,23591E-07 |
| Bacteria | Actinobacteria            | Actinobacteria        | Actinomycetales    | Nocardiaceae                   | Other | 2,23591E-07 |
| Bacteria | Proteobacteria            | Epsilonproteobacteria | Campylobacteriales | Helicobacteraceae              | Other | 1,7687E-07  |
| Bacteria | Proteobacteria            | Gammaproteobacteria   | Aeromonadales      | Aeromonadaceae                 | Other | 1,7687E-07  |
| Bacteria | Proteobacteria            | Gammaproteobacteria   | Aeromonadales      | Other                          | Other | 1,7687E-07  |
| Bacteria | Actinobacteria            | Actinobacteria        | Actinomycetales    | Promicromonosporaceae          | Other | 1,323E-07   |

|          |                |                                     |                                     |                                     |                                     |             |
|----------|----------------|-------------------------------------|-------------------------------------|-------------------------------------|-------------------------------------|-------------|
| Bacteria | Proteobacteria | Alphaproteobacteria                 | Caulobacterales                     | Other                               | Other                               | 1,21261E-07 |
| Bacteria | Proteobacteria | Gammaproteobacteria                 | Chromatiales                        | Other                               | Other                               | 1,21261E-07 |
| Bacteria | Proteobacteria | Alphaproteobacteria                 | Rhodospirillales                    | Acetobacteraceae                    | Other                               | 1,19968E-07 |
| Bacteria | Firmicutes     | Bacilli                             | Lactobacillales                     | Leuconostocaceae                    | Other                               | 1,16665E-07 |
| Bacteria | Proteobacteria | Alphaproteobacteria                 | Sphingomonadales                    | Erythrobacteraceae                  | Other                               | 0           |
| Bacteria | Actinobacteria | Actinobacteria                      | Actinomycetales                     | Kineosporiaceae                     | Other                               | 0           |
| Bacteria | Actinobacteria | Actinobacteria                      | Actinomycetales                     | Geodermatophilaceae                 | Other                               | 0           |
| Bacteria | Proteobacteria | Deltaproteobacteria                 | Myxococcales                        | Polyangiaceae                       | Other                               | 0           |
| Bacteria | Proteobacteria | Alphaproteobacteria                 | Caulobacterales                     | Caulobacteraceae                    | Other                               | 0           |
| Bacteria | Proteobacteria | Gammaproteobacteria                 | Vibrionales                         | Vibrionaceae                        | Other                               | 0           |
| Bacteria | Proteobacteria | Betaproteobacteria                  | Burkholderiales                     | Oxalobacteraceae                    | Oxalicibacterium                    | 3,35386E-06 |
| Bacteria | Proteobacteria | Betaproteobacteria                  | Burkholderiales                     | Oxalobacteraceae                    | Oxalobacter                         | 0,000100905 |
| Bacteria | Proteobacteria | Betaproteobacteria                  | Burkholderiales                     | Alcaligenaceae                      | Paenalcaligenes                     | 7,35898E-06 |
| Bacteria | Proteobacteria | Alphaproteobacteria                 | Rhizobiales                         | Brucellaceae                        | Paenochrobactrum                    | 7,9139E-07  |
| Bacteria | Bacteroidetes  | Bacteroidia                         | Bacteroidales                       | Porphyromonadaceae                  | Paludibacter                        | 0,000503084 |
| Bacteria | Proteobacteria | Gammaproteobacteria                 | Enterobacteriales                   | Enterobacteriaceae                  | Pantoea                             | 2,94886E-06 |
| Bacteria | Firmicutes     | Clostridia                          | Clostridiales                       | Ruminococcaceae                     | Papillibacter                       | 0,000167083 |
| Bacteria | Bacteroidetes  | Bacteroidia                         | Bacteroidales                       | Porphyromonadaceae                  | Parabacteroides                     | 0,008610952 |
| Bacteria | Chlamydiae     | Chlamydia                           | Chlamydiales                        | Parachlamydiaceae                   | Parachlamydia                       | 1,91045E-06 |
| Bacteria | Proteobacteria | Alphaproteobacteria                 | Rhodobacterales                     | Rhodobacteraceae                    | Paracoccus                          | 3,98496E-05 |
| Bacteria | Actinobacteria | Actinobacteria                      | Coriobacteriales                    | Coriobacteriaceae                   | Paraeggerthella                     | 3,42997E-05 |
| Bacteria | Firmicutes     | Bacilli                             | Lactobacillales                     | Lactobacillaceae                    | Paralactobacillus                   | 2,53891E-05 |
| Bacteria | Proteobacteria | Gammaproteobacteria                 | Pseudomonadales                     | Moraxellaceae                       | Paraperlucidibaca                   | 1,80056E-07 |
| Bacteria | Bacteroidetes  | Bacteroidia                         | Bacteroidales                       | Prevotellaceae                      | Paraprevotella                      | 0,006097732 |
| Bacteria | Proteobacteria | Betaproteobacteria                  | Burkholderiales                     | Alcaligenaceae                      | Parapusillimonas                    | 2,93513E-07 |
| Bacteria | Bacteroidetes  | Sphingobacteriia                    | Sphingobacteriales                  | Chitinophagaceae                    | Parasegetibacter                    | 1,16665E-07 |
| Bacteria | Firmicutes     | Clostridia                          | Clostridiales                       | Lachnospiraceae                     | Parasporobacterium                  | 1,96708E-05 |
| Bacteria | Proteobacteria | Betaproteobacteria                  | Burkholderiales                     | Sutterellaceae                      | Parasutterella                      | 0,002389247 |
| Bacteria | Parcubacteria  | Parcubacteria_genera_incertae_sedis | Parcubacteria_genera_incertae_sedis | Parcubacteria_genera_incertae_sedis | Parcubacteria_genera_incertae_sedis | 2,95893E-07 |
| Bacteria | Firmicutes     | Clostridia                          | Clostridiales                       | Clostridiales_Incertae_Sedis_XI     | Parvimonas                          | 4,37167E-05 |
| Bacteria | Proteobacteria | Gammaproteobacteria                 | Pasteurellales                      | Pasteurellaceae                     | Pasteurella                         | 8,22216E-05 |
| Bacteria | Firmicutes     | Bacilli                             | Lactobacillales                     | Lactobacillaceae                    | Pediococcus                         | 3,05774E-06 |
| Bacteria | Bacteroidetes  | Sphingobacteriia                    | Sphingobacteriales                  | Sphingobacteriaceae                 | Pedobacter                          | 1,8518E-07  |
| Bacteria | Proteobacteria | Alphaproteobacteria                 | Rhizobiales                         | Hyphomicrobiaceae                   | Pedomicrobium                       | 0           |
| Bacteria | Proteobacteria | Alphaproteobacteria                 | Rhizobiales                         | Hyphomicrobiaceae                   | Pelagibacterium                     | 1,31964E-06 |
| Bacteria | Proteobacteria | Betaproteobacteria                  | Burkholderiales                     | Comamonadaceae                      | Pelomonas                           | 4,32704E-06 |



|          |                 |                              |                    |                                 |                                      |             |
|----------|-----------------|------------------------------|--------------------|---------------------------------|--------------------------------------|-------------|
| Bacteria | Firmicutes      | Clostridia                   | Clostridiales      | Syntrophomonadaceae             | Pelospora                            | 1,00079E-06 |
| Bacteria | Firmicutes      | Clostridia                   | Clostridiales      | Peptococcaceae 1                | Peptococcus                          | 0,000245346 |
| Bacteria | Firmicutes      | Clostridia                   | Clostridiales      | Clostridiales_Incertae Sedis XI | Peptoniphilus                        | 6,47157E-05 |
| Bacteria | Firmicutes      | Clostridia                   | Clostridiales      | Peptostreptococcaceae           | Peptostreptococcaceae_incertae_sedis | 7,30179E-06 |
| Bacteria | Firmicutes      | Clostridia                   | Clostridiales      | Peptostreptococcaceae           | Peptostreptococcus                   | 9,75244E-05 |
| Bacteria | Proteobacteria  | Deltaproteobacteria          | Bdellovibrionales  | Bacteriovoracaceae              | Peredibacter                         | 4,71531E-06 |
| Bacteria | Proteobacteria  | Gammaproteobacteria          | Pseudomonadales    | Moraxellaceae                   | Perlucidibaca                        | 2,75926E-06 |
| Bacteria | Bacteroidetes   | Bacteroidia                  | Bacteroidales      | Porphyromonadaceae              | Petrimonas                           | 2,86517E-05 |
| Bacteria | Firmicutes      | Negativicutes                | Selenomonadales    | Acidaminococcaceae              | Phascolarctobacterium                | 0,016452076 |
| Bacteria | Proteobacteria  | Deltaproteobacteria          | Myxococcales       | Phaselicytidaceae               | Phaselicystis                        | 0           |
| Bacteria | Proteobacteria  | Alphaproteobacteria          | Caulobacterales    | Caulobacteraceae                | Phenyllobacterium                    | 4,36629E-06 |
| Bacteria | Actinobacteria  | Actinobacteria               | Actinomycetales    | Intrasporangiaceae              | Phycoccus                            | 3,54683E-06 |
| Bacteria | Proteobacteria  | Alphaproteobacteria          | Rhizobiales        | Phyllobacteriaceae              | Phyllobacterium                      | 2,38124E-05 |
| Bacteria | Firmicutes      | Bacilli                      | Lactobacillales    | Enterococcaceae                 | Pilibacter                           | 4,13481E-07 |
| Bacteria | Planctomycetes  | Planctomycetia               | Planctomycetales   | Planctomycetaceae               | Pirellula                            | 8,72979E-07 |
| Bacteria | Planctomycetes  | Planctomycetia               | Planctomycetales   | Planctomycetaceae               | Planctomyces                         | 2,5137E-06  |
| Bacteria | Bacteroidetes   | Flavobacteriia               | Flavobacteriales   | Flavobacteriaceae               | Planobacterium                       | 0,000741298 |
| Bacteria | Firmicutes      | Bacilli                      | Bacillales         | Planococcaceae                  | Planococcaceae_incertae_sedis        | 3,28929E-05 |
| Bacteria | Firmicutes      | Bacilli                      | Bacillales         | Planococcaceae                  | Planococcus                          | 2,03565E-06 |
| Bacteria | Firmicutes      | Bacilli                      | Bacillales         | Planococcaceae                  | Planomicrobium                       | 3,34716E-06 |
| Bacteria | Proteobacteria  | Betaproteobacteria           | Burkholderiales    | Burkholderiaceae                | Polynucleobacter                     | 9,6826E-07  |
| Bacteria | Bacteroidetes   | Cytophagia                   | Cytophagales       | Cytophagaceae                   | Pontibacter                          | 9,33319E-07 |
| Bacteria | Proteobacteria  | Alphaproteobacteria          | Sphingomonadales   | Erythrobacteraceae              | Porphyrobacter                       | 0           |
| Bacteria | Bacteroidetes   | Bacteroidia                  | Bacteroidales      | Porphyromonadaceae              | Porphyromonas                        | 0,00022231  |
| Bacteria | Bacteroidetes   | Bacteroidia                  | Bacteroidales      | Prevotellaceae                  | Prevotella                           | 0,082812046 |
| Bacteria | Bacteroidetes   | Bacteroidetes_incertae_sedis | Prolixibacter      | Prolixibacter                   | Prolixibacter                        | 1,7687E-07  |
| Bacteria | Actinobacteria  | Actinobacteria               | Actinomycetales    | Propionibacteriaceae            | Propionibacterium                    | 0,000361595 |
| Bacteria | Actinobacteria  | Actinobacteria               | Actinomycetales    | Propionibacteriaceae            | Propionicicella                      | 2,32347E-07 |
| Bacteria | Actinobacteria  | Actinobacteria               | Actinomycetales    | Propionibacteriaceae            | Propionicimonas                      | 1,75743E-06 |
| Bacteria | Fusobacteria    | Fusobacteriia                | Fusobacteriales    | Fusobacteriaceae                | Propionigenium                       | 0           |
| Bacteria | Actinobacteria  | Actinobacteria               | Actinomycetales    | Propionibacteriaceae            | Propionimicrobium                    | 3,95695E-07 |
| Bacteria | Verrucomicrobia | Verrucomicrobiae             | Verrucomicrobiales | Verrucomicrobiaceae             | Prostheco bacter                     | 6,40563E-06 |
| Bacteria | Firmicutes      | Clostridia                   | Clostridiales      | Clostridiaceae 1                | Proteiniclasticum                    | 1,30981E-05 |
| Bacteria | Bacteroidetes   | Bacteroidia                  | Bacteroidales      | Porphyromonadaceae              | Proteiniphilum                       | 2,39935E-06 |

|          |                |                     |                    |                                |                        |             |
|----------|----------------|---------------------|--------------------|--------------------------------|------------------------|-------------|
| Bacteria | Firmicutes     | Clostridia          | Clostridiales      | Peptostreptococcaceae          | Proteocatella          | 2,45218E-05 |
| Bacteria | Proteobacteria | Gammaproteobacteria | Enterobacteriales  | Enterobacteriaceae             | Proteus                | 8,2689E-06  |
| Bacteria | Firmicutes     | Clostridia          | Clostridiales      | Lachnospiraceae                | Pseudobutyrvibrio      | 2,7175E-05  |
| Bacteria | Proteobacteria | Alphaproteobacteria | Rhizobiales        | Brucellaceae                   | Pseudochrobactrum      | 2,28769E-07 |
| Bacteria | Actinobacteria | Actinobacteria      | Actinomycetales    | Microbacteriaceae              | Pseudoclavibacter      | 5,68438E-07 |
| Bacteria | Firmicutes     | Clostridia          | Clostridiales      | Ruminococcaceae                | Pseudoflavonifractor   | 0,001604096 |
| Bacteria | Proteobacteria | Gammaproteobacteria | Pseudomonadales    | Pseudomonadaceae               | Pseudomonas            | 8,79561E-05 |
| Bacteria | Firmicutes     | Clostridia          | Clostridiales      | Eubacteriaceae                 | Pseudoramibacter       | 1,03132E-06 |
| Bacteria | Bacteroidetes  | Sphingobacteriia    | Sphingobacteriales | Sphingobacteriaceae            | Pseudosphingobacterium | 2,18362E-06 |
| Bacteria | Proteobacteria | Alphaproteobacteria | Rhodobacterales    | Rhodobacteraceae               | Pseudovibrio           | 0           |
| Bacteria | Proteobacteria | Gammaproteobacteria | Xanthomonadales    | Xanthomonadaceae               | Pseudoxanthomonas      | 0           |
| Bacteria | Fusobacteria   | Fusobacteriia       | Fusobacteriales    | Fusobacteriaceae               | Psychrilyobacter       | 1,46132E-07 |
| Bacteria | Firmicutes     | Bacilli             | Bacillales         | Planococcaceae                 | Psychrobacillus        | 2,21346E-06 |
| Bacteria | Proteobacteria | Gammaproteobacteria | Pseudomonadales    | Moraxellaceae                  | Psychrobacter          | 0,022248244 |
| Bacteria | Firmicutes     | Negativicutes       | Selenomonadales    | Veillonellaceae                | Psychrosinus           | 1,89479E-07 |
| Bacteria | Proteobacteria | Betaproteobacteria  | Burkholderiales    | Alcaligenaceae                 | Pusillimonas           | 0           |
| Bacteria | Synergistetes  | Synergistia         | Synergistales      | Synergistaceae                 | Pyramidobacter         | 4,68017E-05 |
| Bacteria | Proteobacteria | Betaproteobacteria  | Burkholderiales    | Burkholderiaceae               | Ralstonia              | 8,18424E-05 |
| Bacteria | Proteobacteria | Gammaproteobacteria | Enterobacteriales  | Enterobacteriaceae             | Raoultella             | 0,000120494 |
| Bacteria | Actinobacteria | Actinobacteria      | Actinomycetales    | Micrococcaceae                 | Renibacterium          | 0           |
| Bacteria | Proteobacteria | Gammaproteobacteria | Chromatiales       | Chromatiaceae                  | Rheinheimera           | 5,6733E-06  |
| Bacteria | Proteobacteria | Gammaproteobacteria | Pseudomonadales    | Pseudomonadaceae               | Rhizobacter            | 0           |
| Bacteria | Proteobacteria | Alphaproteobacteria | Rhizobiales        | Rhizobiaceae                   | Rhizobium              | 0,000234806 |
| Bacteria | Proteobacteria | Alphaproteobacteria | Rhodobacterales    | Rhodobacteraceae               | Rhodobacter            | 4,91867E-06 |
| Bacteria | Actinobacteria | Actinobacteria      | Actinomycetales    | Nocardiaceae                   | Rhodococcus            | 8,48941E-06 |
| Bacteria | Proteobacteria | Alphaproteobacteria | Rhodospirillales   | Acetobacteraceae               | Rhodopila              | 2,34882E-06 |
| Bacteria | Bacteroidetes  | Flavobacteriia      | Flavobacteriales   | Flavobacteriaceae              | Riemerella             | 6,03136E-06 |
| Bacteria | Bacteroidetes  | Bacteroidia         | Bacteroidales      | Rikenellaceae                  | Rikenella              | 5,28292E-06 |
| Bacteria | Firmicutes     | Clostridia          | Clostridiales      | Lachnospiraceae                | Robinsoniella          | 0,00024207  |
| Bacteria | Firmicutes     | Clostridia          | Clostridiales      | Lachnospiraceae                | Roseburia              | 0,016973011 |
| Bacteria | Proteobacteria | Alphaproteobacteria | Rhodospirillales   | Acetobacteraceae               | Roseomonas             | 4,54106E-06 |
| Bacteria | Proteobacteria | Alphaproteobacteria | Rhodobacterales    | Rhodobacteraceae               | Roseovarius            | 0           |
| Bacteria | Actinobacteria | Actinobacteria      | Actinomycetales    | Micrococcaceae                 | Rothia                 | 0,01665775  |
| Bacteria | Proteobacteria | Alphaproteobacteria | Rhodobacterales    | Rhodobacteraceae               | Rubellimicrobium       | 3,29631E-06 |
| Bacteria | Proteobacteria | Betaproteobacteria  | Burkholderiales    | Burkholderiales_incertae_sedis | Rubrivivax             | 1,81787E-05 |
| Bacteria | Actinobacteria | Actinobacteria      | Rubrobacterales    | Rubrobacteraceae               | Rubrobacter            | 2,13866E-06 |

|          |                                |                                        |                                        |                                        |                                        |             |
|----------|--------------------------------|----------------------------------------|----------------------------------------|----------------------------------------|----------------------------------------|-------------|
| Bacteria | Proteobacteria                 | Gammaproteobacteria                    | Aeromonadales                          | Succinivibrionaceae                    | Ruminobacter                           | 2,61988E-05 |
| Bacteria | Firmicutes                     | Clostridia                             | Clostridiales                          | Ruminococcaceae                        | Ruminococcus                           | 0,00584075  |
| Bacteria | Firmicutes                     | Clostridia                             | Clostridiales                          | Lachnospiraceae                        | Ruminococcus2                          | 0,004145569 |
| Bacteria | Candidatus<br>Saccharibacteria | Saccharibacteria_genera_incertae_sedis | Saccharibacteria_genera_incertae_sedis | Saccharibacteria_genera_incertae_sedis | Saccharibacteria_genera_incertae_sedis | 0,000338023 |
| Bacteria | Firmicutes                     | Clostridia                             | Clostridiales                          | Ruminococcaceae                        | Saccharofermentans                     | 2,87402E-05 |
| Bacteria | Actinobacteria                 | Actinobacteria                         | Actinomycetales                        | Pseudonocardaceae                      | Saccharomonospora                      | 3,59903E-07 |
| Bacteria | Firmicutes                     | Bacilli                                | Bacillales                             | Staphylococcaceae                      | Salinicoccus                           | 6,29717E-06 |
| Bacteria | Bacteroidetes                  | Flavobacteriia                         | Flavobacteriales                       | Flavobacteriaceae                      | Salinimicrobium                        | 0           |
| Bacteria | Proteobacteria                 | Gammaproteobacteria                    | Enterobacteriales                      | Enterobacteriaceae                     | Salmonella                             | 6,56298E-06 |
| Bacteria | Firmicutes                     | Clostridia                             | Clostridiales                          | Clostridiaceae 1                       | Sarcina                                | 5,35664E-05 |
| Bacteria | Proteobacteria                 | Betaproteobacteria                     | Burkholderiales                        | Comamonadaceae                         | Schlegelella                           | 1,80056E-07 |
| Bacteria | Firmicutes                     | Negativicutes                          | Selenomonadales                        | Veillonellaceae                        | Schwartzia                             | 0,001440899 |
| Bacteria | Firmicutes                     | Clostridia                             | Clostridiales                          | Clostridiales_Incertae_Sedis_XI        | Sedimentibacter                        | 9,5542E-07  |
| Bacteria | Bacteroidetes                  | Sphingobacteriia                       | Sphingobacteriales                     | Chitinophagaceae                       | Sediminibacterium                      | 3,61663E-06 |
| Bacteria | Firmicutes                     | Negativicutes                          | Selenomonadales                        | Veillonellaceae                        | Selenomonas                            | 0,004450666 |
| Bacteria | Actinobacteria                 | Actinobacteria                         | Actinomycetales                        | Beutenbergiaceae                       | Serinibacter                           | 5,1946E-05  |
| Bacteria | Proteobacteria                 | Gammaproteobacteria                    | Pseudomonadales                        | Pseudomonadaceae                       | Serpens                                | 2,51194E-07 |
| Bacteria | Proteobacteria                 | Gammaproteobacteria                    | Enterobacteriales                      | Enterobacteriaceae                     | Serratia                               | 1,95515E-06 |
| Bacteria | Firmicutes                     | Erysipelotrichia                       | Erysipelotrichales                     | Erysipelotrichaceae                    | Sharpea                                | 1,18228E-07 |
| Bacteria | Proteobacteria                 | Gammaproteobacteria                    | Alteromonadales                        | Shewanellaceae                         | Shewanella                             | 2,75926E-06 |
| Bacteria | Proteobacteria                 | Betaproteobacteria                     | Rhodocyclales                          | Rhodocyclaceae                         | Shinella                               | 1,19968E-07 |
| Bacteria | Firmicutes                     | Clostridia                             | Clostridiales                          | Lachnospiraceae                        | Shuttleworthia                         | 2,03197E-06 |
| Bacteria | Proteobacteria                 | Betaproteobacteria                     | Neisseriales                           | Neisseriaceae                          | Simonsiella                            | 7,86657E-07 |
| Bacteria | Proteobacteria                 | Betaproteobacteria                     | Burkholderiales                        | Comamonadaceae                         | Simplicispira                          | 2,39935E-06 |
| Bacteria | Firmicutes                     | Bacilli                                | Bacillales                             | Bacillaceae 2                          | Sinobaca                               | 1,04981E-06 |
| Bacteria | Proteobacteria                 | Alphaproteobacteria                    | Rhodospirillales                       | Rhodospirillaceae                      | Skermanella                            | 0           |
| Bacteria | Actinobacteria                 | Actinobacteria                         | Coriobacteriales                       | Coriobacteriaceae                      | Slackia                                | 2,46535E-05 |
| Bacteria | Fusobacteria                   | Fusobacteriia                          | Fusobacteriales                        | Leptotrichiaceae                       | Sneathia                               | 1,16754E-06 |
| Bacteria | Firmicutes                     | Bacilli                                | Bacillales                             | Planococcaceae                         | Solibacillus                           | 2,42521E-07 |
| Bacteria | Actinobacteria                 | Actinobacteria                         | Solirubrobacterales                    | Solirubrobacteraceae                   | Solirubrobacter                        | 0           |
| Bacteria | Bacteroidetes                  | Flavobacteriia                         | Flavobacteriales                       | Flavobacteriaceae                      | Soonwooa                               | 1,55905E-05 |
| Bacteria | Chloroflexi                    | Thermomicrobia                         | Sphaerobacterales                      | Sphaerobacteraceae                     | Sphaerobacter                          | 4,84267E-06 |
| Bacteria | Spirochaetes                   | Spirochaetia                           | Spirochaetales                         | Spirochaetaceae                        | Sphaerochaeta                          | 0,000675312 |
| Bacteria | Bacteroidetes                  | Sphingobacteriia                       | Sphingobacteriales                     | Sphingobacteriaceae                    | Sphingobacterium                       | 1,6181E-05  |
| Bacteria | Proteobacteria                 | Alphaproteobacteria                    | Sphingomonadales                       | Sphingomonadaceae                      | Sphingobium                            | 6,77944E-06 |
| Bacteria | Proteobacteria                 | Alphaproteobacteria                    | Sphingomonadales                       | Sphingomonadaceae                      | Sphingomonas                           | 0,000160447 |

|          |                           |                           |                                    |                                    |                                          |             |
|----------|---------------------------|---------------------------|------------------------------------|------------------------------------|------------------------------------------|-------------|
| Bacteria | Proteobacteria            | Alphaproteobacteria       | Sphingomonadales                   | Sphingomonadaceae                  | Sphingosinicella                         | 7,66291E-07 |
| Bacteria | Spirochaetes              | Spirochaetia              | Spirochaetales                     | Spirochaetaceae                    | Spirochaeta                              | 1,7687E-07  |
| Bacteria | Firmicutes                | Clostridia                | Clostridiales                      | Peptostreptococcaceae              | Sporacetigenium                          | 1,85711E-05 |
| Bacteria | Firmicutes                | Clostridia                | Clostridiales                      | Ruminococcaceae                    | Sporobacter                              | 0,001074167 |
| Bacteria | Firmicutes                | Bacilli                   | Bacillales                         | Sporolactobacillaceae              | Sporolactobacillaceae<br>_incertae_sedis | 1,8518E-07  |
| Bacteria | SR1                       | SR1_genera_incertae_sedis | SR1_genera_incertae_sedis          | SR1_genera_incertae_sedis          | SR1_genera_incertae<br>_sedis            | 1,88632E-05 |
| Bacteria | Proteobacteria            | Alphaproteobacteria       | Sphingomonadales                   | Sphingomonadaceae                  | Stakelama                                | 0           |
| Bacteria | Firmicutes                | Bacilli                   | Bacillales                         | Staphylococcaceae                  | Staphylococcus                           | 0,000338795 |
| Bacteria | Proteobacteria            | Gammaproteobacteria       | Xanthomonadales                    | Xanthomonadaceae                   | Stenotrophomonas                         | 2,56271E-05 |
| Bacteria | Fusobacteria              | Fusobacteriia             | Fusobacteriales                    | Leptotrichiaceae                   | Streptobacillus                          | 4,24695E-05 |
| Bacteria | Firmicutes                | Bacilli                   | Lactobacillales                    | Streptococcaceae                   | Streptococcus                            | 0,010249989 |
| Bacteria | Actinobacteria            | Actinobacteria            | Actinomycetales                    | Streptomycetaceae                  | Streptomyces                             | 2,2448E-06  |
| Bacteria | Cyanobacteria/Chloroplast | Chloroplast               | Chloroplast                        | Chloroplast                        | Streptophyta                             | 0,000413259 |
| Bacteria | Verrucomicrobia           | Subdivision3              | Subdivision3_genera_incertae_sedis | Subdivision3_genera_incertae_sedis | Subdivision3_genera_incertae_sedis       | 1,76108E-06 |
| Bacteria | Verrucomicrobia           | Subdivision5              | Subdivision5_genera_incertae_sedis | Subdivision5_genera_incertae_sedis | Subdivision5_genera_incertae_sedis       | 0,000168423 |
| Bacteria | Firmicutes                | Clostridia                | Clostridiales                      | Ruminococcaceae                    | Subdoligranulum                          | 3,11616E-05 |
| Bacteria | Firmicutes                | Negativicutes             | Selenomonadales                    | Acidaminococcaceae                 | Succiniclasticum                         | 3,56926E-07 |
| Bacteria | Firmicutes                | Negativicutes             | Selenomonadales                    | Acidaminococcaceae                 | Succinispira                             | 1,7687E-07  |
| Bacteria | Proteobacteria            | Gammaproteobacteria       | Aeromonadales                      | Succinivibrionaceae                | Succinivibrio                            | 0,004408282 |
| Bacteria | Proteobacteria            | Betaproteobacteria        | Burkholderiales                    | Sutterellaceae                     | Sutterella                               | 0,003204398 |
| Bacteria | Proteobacteria            | Gammaproteobacteria       | Cardiobacteriales                  | Cardiobacteriaceae                 | Suttonella                               | 9,36591E-06 |
| Bacteria | Synergistetes             | Synergistia               | Synergistales                      | Synergistaceae                     | Synergistes                              | 1,24233E-05 |
| Bacteria | Firmicutes                | Clostridia                | Clostridiales                      | Lachnospiraceae                    | Syntrophococcus                          | 8,40861E-06 |
| Bacteria | Bacteroidetes             | Bacteroidia               | Bacteroidales                      | Porphyromonadaceae                 | Tannerella                               | 0,000153079 |
| Bacteria | Proteobacteria            | Betaproteobacteria        | Burkholderiales                    | Burkholderiales_incertae_sedis     | Tepidimonas                              | 0           |
| Bacteria | Actinobacteria            | Actinobacteria            | Actinomycetales                    | Propionibacteriaceae               | Tessaracoccus                            | 9,71553E-05 |
| Bacteria | Firmicutes                | Bacilli                   | Lactobacillales                    | Enterococcaceae                    | Tetragenococcus                          | 1,21228E-06 |
| Bacteria | Proteobacteria            | Betaproteobacteria        | Rhodocyclales                      | Rhodocyclaceae                     | Thauera                                  | 2,39935E-07 |
| Bacteria | Firmicutes                | Bacilli                   | Bacillales                         | Bacillales_Incertae_Sedis_X        | Thermicanus                              | 0           |
| Archaea  | Euryarchaeota             | Thermoplasmata            | Thermoplasmatales                  | Thermoplasmatales_incertae_sedis   | Thermogymnomonas                         | 1,30418E-05 |
| Bacteria | Actinobacteria            | Thermoleophilia           | Thermoleophilales                  | Thermoleophilaceae                 | Thermoleophilum                          | 0           |

|          |                     |                       |                    |                                  |                     |             |
|----------|---------------------|-----------------------|--------------------|----------------------------------|---------------------|-------------|
| Bacteria | Proteobacteria      | Gammaproteobacteria   | Xanthomonadales    | Xanthomonadaceae                 | Thermomonas         | 0           |
| Bacteria | Proteobacteria      | Gammaproteobacteria   | Thiotrichales      | Piscirickettsiaceae              | Thioalkalimicrobium | 7,82941E-07 |
| Bacteria | Proteobacteria      | Gammaproteobacteria   | Thiotrichales      | Thiotrichaceae                   | Thiothrix           | 3,11916E-06 |
| Bacteria | Firmicutes          | Clostridia            | Clostridiales      | Clostridiales_Incertae_Sedis_XI  | Tissierella         | 3,72507E-06 |
| Bacteria | Proteobacteria      | Gammaproteobacteria   | Aeromonadales      | Aeromonadaceae                   | Tolumonas           | 5,59839E-07 |
| Bacteria | Actinobacteria      | Actinobacteria        | Actinomycetales    | Corynebacterineae_incertae_sedis | Tomitella           | 1,56588E-07 |
| Bacteria | Spirochaetes        | Spirochaetia          | Spirochaetales     | Spirochaetaceae                  | Treponema           | 0,011113654 |
| Bacteria | Firmicutes          | Bacilli               | Lactobacillales    | Carnobacteriaceae                | Trichococcus        | 2,86886E-05 |
| Bacteria | Deinococcus-Thermus | Deinococci            | Deinococcales      | Trueperaceae                     | Truepera            | 0           |
| Bacteria | Actinobacteria      | Actinobacteria        | Actinomycetales    | Actinomycetaceae                 | Trueperella         | 3,51495E-05 |
| Bacteria | Actinobacteria      | Actinobacteria        | Actinomycetales    | Corynebacteriaceae               | Turicella           | 5,19489E-06 |
| Bacteria | Firmicutes          | Erysipelotrichia      | Erysipelotrichales | Erysipelotrichaceae              | Turicibacter        | 0,000898162 |
| Bacteria | Proteobacteria      | Betaproteobacteria    | Burkholderiales    | Oxalobacteraceae                 | Undibacterium       | 4,98164E-06 |
| Bacteria | Firmicutes          | Bacilli               | Bacillales         | Planococcaceae                   | Ureibacillus        | 3,53741E-07 |
| Bacteria | Proteobacteria      | Betaproteobacteria    | Neisseriales       | Neisseriaceae                    | Uruburuella         | 1,35808E-05 |
| Bacteria | Firmicutes          | Bacilli               | Lactobacillales    | Enterococcaceae                  | Vagococcus          | 3,50502E-05 |
| Bacteria | Proteobacteria      | Deltaproteobacteria   | Bdellovibrionales  | Bdellovibrionaceae               | Vampirovibrio       | 0,003219813 |
| Bacteria | Proteobacteria      | Betaproteobacteria    | Burkholderiales    | Comamonadaceae                   | Variovorax          | 1,09447E-05 |
| Bacteria | Firmicutes          | Negativicutes         | Selenomonadales    | Veillonellaceae                  | Veillonella         | 0,0002448   |
| Bacteria | Proteobacteria      | Gammaproteobacteria   | Vibrionales        | Vibrionaceae                     | Vibrio              | 5,20885E-06 |
| Bacteria | Lentisphaerae       | Lentisphaeria         | Victivallales      | Victivallaceae                   | Victivallis         | 0,000360707 |
| Bacteria | Actinobacteria      | Actinobacteria        | Actinomycetales    | Micromonosporaceae               | Virgisporangium     | 2,23591E-07 |
| Bacteria | Proteobacteria      | Betaproteobacteria    | Neisseriales       | Neisseriaceae                    | Vitreoscilla        | 2,0353E-06  |
| Bacteria | Bacteroidetes       | Flavobacteriia        | Flavobacteriales   | Flavobacteriaceae                | Wautersiella        | 4,93524E-05 |
| Bacteria | Bacteroidetes       | Flavobacteriia        | Flavobacteriales   | Flavobacteriaceae                | Weeksella           | 0           |
| Bacteria | Firmicutes          | Bacilli               | Lactobacillales    | Leuconostocaceae                 | Weissella           | 0,000169603 |
| Bacteria | Actinobacteria      | Actinobacteria        | Actinomycetales    | Nocardiaceae                     | Williamsia          | 0           |
| Bacteria | Proteobacteria      | Gammaproteobacteria   | Xanthomonadales    | Xanthomonadaceae                 | Wohlfahrtiimonas    | 3,42297E-06 |
| Bacteria | Proteobacteria      | Epsilonproteobacteria | Campylobacteriales | Helicobacteraceae                | Wolinella           | 1,19753E-06 |
| Bacteria | Proteobacteria      | Gammaproteobacteria   | Xanthomonadales    | Xanthomonadaceae                 | Xanthomonas         | 0           |
| Bacteria | Bacteroidetes       | Bacteroidia           | Bacteroidales      | Prevotellaceae                   | Xylanibacter        | 0,0001259   |
| Bacteria | Actinobacteria      | Actinobacteria        | Actinomycetales    | Micrococcaceae                   | Yaniella            | 1,01713E-05 |
| Bacteria | Proteobacteria      | Gammaproteobacteria   | Enterobacteriales  | Enterobacteriaceae               | Yokenella           | 1,25471E-06 |
| Bacteria | Actinobacteria      | Actinobacteria        | Actinomycetales    | Micrococcaceae                   | Zhihengliuella      | 1,21261E-07 |
| Bacteria | Proteobacteria      | Betaproteobacteria    | Rhodocyclales      | Rhodocyclaceae                   | Zoogloea            | 1,43961E-06 |
